# Supplementary material for: Impact of a short version of the CONSORT checklist for peer reviewers to improve the reporting of randomised controlled trials published in biomedical journals: study protocol for a randomised controlled trial
Source: PubMed Central journal article supplement (PMC7103787; doi:10.1136/bmjopen-2019-035114), 2020-03-19
Supplement: bmjopen-2019-035114.draft_revisions.pdf [file bmjopen-2019-035114.draft_revisions.pdf]

# BMJ Open

BMJ Open is committed to open peer review. As part of this commitment we make the peer review history of every article we publish publicly available.

When an article is published we post the peer reviewers' comments and the authors' responses online. We also post the versions of the paper that were used during peer review. These are the versions that the peer review comments apply to.

The versions of the paper that follow are the versions that were submitted during the peer review process. They are not the versions of record or the final published versions. They should not be cited or distributed as the published version of this manuscript.

BMJ Open is an open access journal and the full, final, typeset and author-corrected version of record of the manuscript is available on our site with no access controls, subscription charges or pay-per-view fees (<http://bmjopen.bmj.com>).

If you have any questions on BMJ Open's open peer review process please email [info.bmjopen@bmj.com](mailto:info.bmjopen@bmj.com)

# BMJ Open

## Impact of a short version of the CONSORT checklist for peer reviewers to improve the reporting of randomised controlled trials published in biomedical journals: study protocol for a randomised controlled trial

|                               |                                                                                                                                                                                                                                                                                                                                                                                                                                                                                                                                                                                                                                                                                                                                                                                                                                                                                                                                                                                                                                                                                                                                                                                        |
|-------------------------------|----------------------------------------------------------------------------------------------------------------------------------------------------------------------------------------------------------------------------------------------------------------------------------------------------------------------------------------------------------------------------------------------------------------------------------------------------------------------------------------------------------------------------------------------------------------------------------------------------------------------------------------------------------------------------------------------------------------------------------------------------------------------------------------------------------------------------------------------------------------------------------------------------------------------------------------------------------------------------------------------------------------------------------------------------------------------------------------------------------------------------------------------------------------------------------------|
| Journal:                      | <i>BMJ Open</i>                                                                                                                                                                                                                                                                                                                                                                                                                                                                                                                                                                                                                                                                                                                                                                                                                                                                                                                                                                                                                                                                                                                                                                        |
| Manuscript ID                 | bmjopen-2019-035114                                                                                                                                                                                                                                                                                                                                                                                                                                                                                                                                                                                                                                                                                                                                                                                                                                                                                                                                                                                                                                                                                                                                                                    |
| Article Type:                 | Protocol                                                                                                                                                                                                                                                                                                                                                                                                                                                                                                                                                                                                                                                                                                                                                                                                                                                                                                                                                                                                                                                                                                                                                                               |
| Date Submitted by the Author: | 21-Oct-2019                                                                                                                                                                                                                                                                                                                                                                                                                                                                                                                                                                                                                                                                                                                                                                                                                                                                                                                                                                                                                                                                                                                                                                            |
| Complete List of Authors:     | Speich, Benjamin; University of Oxford, Centre for Statistics in Medicine, Nuffield Department of Orthopaedics, Rheumatology and Musculoskeletal Sciences<br>Schroter, Sara; BMJ Editorial,<br>Briel, Matthias; University of Basel, Basel Institute for Clinical Epidemiology and Biostatistics, Department of Clinical Research, University Hospital Basel<br>Moher, David; Ottawa Hospital Research Institute, Ottawa Methods Centre<br>Puebla, Iratxe ; PLOS ONE, PLOS ONE, Public Library of Science, San Francisco, California, United States of America and Cambridge<br>Clark, Alejandra ; PLOS One, PLOS ONE, Public Library of Science, San Francisco, California, United States of America and Cambridge<br>Maia Schlüssel, Michael; University of Oxford, Centre for Statistics in Medicine, Nuffield Department of Orthopaedics, Rheumatology and Musculoskeletal Sciences<br>Ravaud, Philippe; Universite Paris Descartes,<br>Boutron, Isabelle; Université Paris Descartes, Centre d'épidémiologie clinique<br>Hopewell, Sally; University of Oxford, Centre for Statistics in Medicine, Nuffield Department of Orthopaedics, Rheumatology and Musculoskeletal Sciences |
| Keywords:                     | Protocols & guidelines < HEALTH SERVICES ADMINISTRATION & MANAGEMENT, Quality in health care < HEALTH SERVICES ADMINISTRATION & MANAGEMENT, MEDICAL EDUCATION & TRAINING, STATISTICS & RESEARCH METHODS                                                                                                                                                                                                                                                                                                                                                                                                                                                                                                                                                                                                                                                                                                                                                                                                                                                                                                                                                                                |
|                               |                                                                                                                                                                                                                                                                                                                                                                                                                                                                                                                                                                                                                                                                                                                                                                                                                                                                                                                                                                                                                                                                                                                                                                                        |

SCHOLARONE™  
Manuscripts

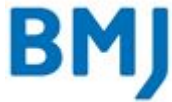

I, the Submitting Author has the right to grant and does grant on behalf of all authors of the Work (as defined in the below author licence), an exclusive licence and/or a non-exclusive licence for contributions from authors who are: i) UK Crown employees; ii) where BMJ has agreed a CC-BY licence shall apply, and/or iii) in accordance with the terms applicable for US Federal Government officers or employees acting as part of their official duties; on a worldwide, perpetual, irrevocable, royalty-free basis to BMJ Publishing Group Ltd ("BMJ") its licensees and where the relevant Journal is co-owned by BMJ to the co-owners of the Journal, to publish the Work in this journal and any other BMJ products and to exploit all rights, as set out in our [licence](#).

The Submitting Author accepts and understands that any supply made under these terms is made by BMJ to the Submitting Author unless you are acting as an employee on behalf of your employer or a postgraduate student of an affiliated institution which is paying any applicable article publishing charge ("APC") for Open Access articles. Where the Submitting Author wishes to make the Work available on an Open Access basis (and intends to pay the relevant APC), the terms of reuse of such Open Access shall be governed by a Creative Commons licence – details of these licences and which [Creative Commons](#) licence will apply to this Work are set out in our licence referred to above.

Other than as permitted in any relevant BMJ Author's Self Archiving Policies, I confirm this Work has not been accepted for publication elsewhere, is not being considered for publication elsewhere and does not duplicate material already published. I confirm all authors consent to publication of this Work and authorise the granting of this licence.

1  
2  
3 1 **Impact of a short version of the CONSORT checklist for peer reviewers to improve the**  
4  
5 2 **reporting of randomised controlled trials published in biomedical journals: study**  
6  
7 3 **protocol for a randomised controlled trial**  
8

9 4 Benjamin Speich<sup>1,2,\*</sup>, Sara Schroter<sup>3</sup>, Matthias Briel<sup>2,4</sup>, David Moher<sup>5,6</sup>, Iratxe Puebla<sup>7</sup>,  
10  
11 5 Alejandra Clark<sup>7</sup>, Michael M Schlusser<sup>1,8</sup>, Philippe Ravaud<sup>9,10</sup>, Isabelle Boutron<sup>9,10</sup>, Sally  
12  
13 6 Hopewell<sup>1</sup>  
14  
15  
16 7

17  
18 8 <sup>1</sup>Centre for Statistics in Medicine, Nuffield Department of Orthopaedics, Rheumatology and  
19  
20 9 Musculoskeletal Sciences, University of Oxford, Oxford, United Kingdom

21  
22 10 <sup>2</sup>Basel Institute for Clinical Epidemiology and Biostatistics, Department of Clinical Research,  
23  
24 11 University Hospital Basel, University of Basel, Basel, Switzerland

25  
26 12 <sup>3</sup>The BMJ, London, United Kingdom

27  
28 13 <sup>4</sup>Department of Health Research Methods, Evidence, and Impact, McMaster University,  
29  
30 14 Hamilton, Canada

31  
32 15 <sup>5</sup>Centre for Journalology, Clinical Epidemiology Program, Ottawa Hospital Research Institute,  
33  
34 16 Canada

35  
36 17 <sup>6</sup>School of Epidemiology and Public Health, Faculty of Medicine, University of Ottawa

37  
38 18 <sup>7</sup>*PLOS ONE*, Public Library of Science, San Francisco, California, United States of America  
39  
40 19 and Cambridge, United Kingdom

41  
42 20 <sup>8</sup>The EQUATOR Network, Oxford, United Kingdom

43  
44 21 <sup>9</sup>Centre d'Épidémiologie Clinique, Hôpital Hôtel-Dieu, Assistance Publique Hôpitaux de Paris  
45  
46 22 (APHP) F-75004 Paris, France

47  
48 23 <sup>10</sup>Université de Paris, CRESS, Inserm, INRA, F-75004, Paris, France  
49  
50  
51 24

52  
53 25 \*Corresponding author:

54  
55 26 Benjamin Speich, PhD,  
56  
57 27 Centre for Statistics in Medicine, Nuffield Department of Orthopaedics, Rheumatology and  
58  
59 28 Musculoskeletal Sciences,  
60

1  
2  
3 29 University of Oxford,  
4 30 Windmill Road  
5 31 OX3 7LD Oxford  
6 32 United Kingdom  
7 33 Email: benjamin.speich@ndorms.ox.ac.uk  
8  
9

10  
11 34 E-mail addresses of all co-authors:

12  
13 35 Benjamin Speich <benjamin.speich@ndorms.ox.ac.uk>  
14

15 36 Sara Schroter <sschroter@bmj.com>  
16

17 37 Matthias Briel <matthias.briel@usb.ch>  
18

19 38 David Moher <dmoher@ohri.ca>  
20

21 39 Iratxe Puebla <ipuebla@plos.org>  
22

23 40 Alejandra Clark <aclark@plos.org>  
24

25 41 Michael M Schlusser <michael.schlusser@ndorms.ox.ac.uk>  
26

27 42 Philippe Ravaud <philipperavaud@gmail.com>  
28

29 43 Isabelle Boutron <isabelle.boutron@aphp.fr>  
30

31 44 Sally Hopewell <sally.hopewell@csm.ox.ac.uk>  
32  
33

34 45

35  
36 46 **Running title:** CONSORT for Peer Review (CONSORT-PR)  
37

38 47

39  
40 48 **Funding:** Benjamin Speich is supported by an Advanced Postdoc.Mobility grant from the  
41  
42 49 Swiss National Science Foundation (P300PB\_177933). David Moher is supported by a  
43  
44 50 University Research Chair, Ottawa. Michael M Schlusser is funded by Cancer Research UK.  
45  
46 51 The funders had no role in designing the study and will also have no role in conducting the  
47  
48 52 study, or analysing and reporting study results.  
49  
50

51 53

52  
53 54 **Keywords:** CONSORT; reporting guidelines; randomised controlled trials as topic; peer  
54  
55 55 review; meta-research  
56  
57  
58  
59  
60

## 56 **Abstract**

57 **Introduction:** Transparent and accurate reporting is essential for readers to adequately  
58 interpret the results of a study. Journals can play a vital role in improving the reporting of  
59 published randomised controlled trials (RCTs). We describe an RCT to evaluate our  
60 hypothesis that asking peer reviewers to check whether the most important and poorly reported  
61 CONSORT (CONsolidated Standards for Reporting Trials) items are adequately reported, will  
62 result in higher adherence to CONSORT guidelines in published RCTs.

63 **Methods and Analysis:** Manuscripts presenting the primary results of RCTs submitted to  
64 participating journals will be randomised to either the intervention group (peer reviewers will  
65 receive a reminder and short explanation of the ten most important and poorly reported  
66 CONSORT items; they will be asked to check if these items are reported in the submitted  
67 manuscript) or a control group (usual journal practice). The primary outcome will be the mean  
68 proportion of the ten items that are adequately reported in the published articles. Peer  
69 reviewers and manuscript authors will not be informed of the study hypothesis, design, or  
70 intervention. Outcomes will be assessed in duplicate from published articles by two data  
71 extractors (at least one blinded to the intervention). We will enrol eligible manuscripts until a  
72 minimum of 83 articles per group (166 in total) are published.

73 **Ethics and Dissemination:** This pragmatic RCT was approved by the Medical Sciences  
74 Interdivisional Research Ethics Committee of the University of Oxford (R62779/RE001). If this  
75 intervention is effective, it could be implemented by all medical journals without requiring large  
76 additional resources at journal level. Findings will be disseminated through presentations in  
77 relevant conferences and peer-reviewed publications. This trial is registered on the Open  
78 Science Framework (<https://osf.io/c4hn8>).

79

## 80 **Strengths and limitations of this study**

- 81 • Pragmatic randomised controlled trial (RCT) with individual randomisation of real  
82 manuscripts describing RCTs submitted to a variety of journals.
- 83 • If this simple intervention is effective, it could be implemented by journals without  
84 requiring large additional resources at a journal level.
- 85 • We could not include the intervention within the journals' agreement to review letter or  
86 all peer reviewers would receive the intervention due to the automated processes of  
87 the journals' editorial systems. This risks peer reviewers potentially ignoring the  
88 separate email containing the CONSORT reminder.

## 90 Introduction

### 91 Background and rationale

92 There is substantial agreement that well conducted and reported randomised controlled trials  
93 (RCTs) generate the most trustworthy evidence when evaluating newly developed or existing  
94 clinical interventions.<sup>1-3</sup> For clinicians, scientists and decision makers, published articles are  
95 often the only way to know how a study was conducted. In order to judge the internal and  
96 external validity of RCTs, it is crucial that these articles present transparent, accurate and  
97 unbiased information about the methods and conduct of the RCT.

98  
99 To improve the quality and transparency of clinical and epidemiological research, the  
100 EQUATOR (Enhancing the Quality and Transparency of Research) Network was founded in  
101 2006.<sup>4-9</sup> This international network, which assists in the development of reporting guidelines  
102 and actively promotes their use, consists of methodologists, epidemiologists, reporting  
103 guideline developers, statisticians, clinicians and journal editors.

104  
105 The CONSORT Statement (CONsolidated Standards of Reporting Trials) is perhaps the most  
106 prominent reporting guideline, designed to help improve the transparency and quality of  
107 reporting of RCTs.<sup>10-12</sup> It guides authors, peer reviewers and journal editors on the minimum  
108 information to be included in published reports of RCTs to facilitate critical judgment and  
109 interpretation of results and consists of 25 items and a flow diagram. The last update of the  
110 CONSORT Statement was published simultaneously in 10 leading medical journals in 2010<sup>12</sup>  
111 and currently CONSORT is endorsed by over 600 journals worldwide.<sup>13</sup>

112  
113 Despite some improvement in reporting following the endorsement of the CONSORT  
114 Statement, there remain major reporting deficiencies in published RCTs.<sup>3 14-20</sup> For example, a  
115 study of 1122 RCTs indexed in PubMed in December 2012 found that many did not define the  
116 primary outcome (31%), state the sample size calculation (45%), or explain the method of



1  
2  
3 117 allocation concealment (50%).<sup>21</sup> This lack of transparency is a major limiting factor for readers  
4  
5 118 who assess an article in order to find the answer to a specific question; it is also a major  
6  
7 119 problem for scientists who perform systematic reviews and meta-analyses.  
8

9 120

### 11 121 **Evidence to date**

12  
13  
14 122 Journals can play a vital role in improving the reporting of published RCTs. For example, a  
15  
16 123 survey of journals' 'Instructions to Authors' in 2014 found that 63% (106 of 168) of biomedical  
17  
18 124 journals mentioned CONSORT;<sup>22</sup> however of those journals only 38 (36%) required a  
19  
20 125 completed CONSORT checklist on submission. Such implementation indicates some  
21  
22 126 improvement over time compared to an assessment in 2007 when only 17 of 62 (27%) journals  
23  
24 127 requested the CONSORT checklist on submission.<sup>23</sup> A study using interrupted time series  
25  
26 128 analysis and assessing if the CONSORT checklist for reporting abstracts of RCTs had an effect  
27  
28 129 on reporting quality found that results were better reported in journals which had an active  
29  
30 130 editorial policy to implement the checklist.<sup>24</sup>  
31

32  
33 131

34  
35 132 A scoping review conducted in 2017 by Blanco and colleagues summarised different  
36  
37 133 interventions aimed at improving adherence to reporting guidelines.<sup>25</sup> They identified a number  
38  
39 134 of different interventions, some of which had been evaluated at journals. However, all the  
40  
41 135 interventions, except requesting submission of checklists from authors, required additional  
42  
43 136 resources from the journal (e.g. internal peer review by editorial assistants or inviting an  
44  
45 137 additional statistical peer-reviewer<sup>26 27</sup>). Therefore, it is unlikely that these interventions will be  
46  
47 138 implemented in the majority of journals, especially smaller journals with limited resources.  
48  
49 139 Another study found that providing authors with a web-based CONSORT tool, which combined  
50  
51 140 different CONSORT extensions and provided authors with a customised checklist, did not  
52  
53 141 improve reporting when used at the manuscript revision stage.<sup>28</sup> However, a study examining  
54  
55 142 "the nature and extent of changes made to manuscripts after peer review, in relation to the  
56  
57  
58  
59  
60

1  
2  
3 143 reporting of methodological aspects of RCTs” and “the type of changes requested by peer  
4  
5 144 reviewers” found that peer review did lead to some improvement in reporting.<sup>26</sup>  
6  
7 145

8  
9 146 The role of peer reviewers and expectations of them is varied.<sup>29</sup> While CONSORT checklists  
10  
11 147 are sometimes available for peer reviewers to check, they are not typically instructed to assess  
12  
13 148 this information as part of their review and there have been no studies evaluating the effect of  
14  
15 149 asking them to do this. We plan to evaluate the impact of giving peer reviewers a short version  
16  
17 150 of the CONSORT checklist together with a brief explanation of the items and asking them to  
18  
19 151 check if they are adequately reported.  
20  
21 152

## 22 23 24 25 153 **Methods**

### 26 27 154 **Objective**

28  
29  
30 155 The objective of this study is to evaluate the impact of giving peer reviewers, during the  
31  
32 156 standard peer review process, a short version of the CONSORT checklist (C-short) together  
33  
34 157 with a brief explanation of the items and asking them to check if they are adequately reported  
35  
36 158 in the manuscript.  
37  
38 159

### 39 40 41 42 160 **Study design**

43  
44  
45 161 This study is a multicentre RCT with submitted manuscripts as the unit of randomisation  
46  
47 162 (Figure 1; allocation ratio 1:1).  
48  
49 163

### 50 51 164 **Study setting and eligibility criteria**

52  
53 165 The population will be defined on two levels: included journals and included manuscripts.  
54  
55 166

#### 56 57 167 Inclusion criteria for journals: 58 59 60

1  
2  
3 168 Included journals must: i) endorse the CONSORT Statement by mentioning it in the journals'  
4  
5 169 Instruction to Authors; ii) have published primary results of at least five RCTs in 2017 (identified  
6  
7 170 using a PubMed search). To be efficient, we plan to contact (via email) the editors of eligible  
8  
9 171 journals from specific publishers (e.g. BMJ Publishing Group; Public Library of Science  
10  
11 172 [PLOS]) instead of separate journals. A description of the requirements for participation and a  
12  
13 173 short summary information sheet will be included as part of the email invitation sent to journal  
14  
15 174 editors. If a journal is eligible, and the editor agrees to take part, the editor will need to provide  
16  
17 175 access to their editorial system (e.g. ScholarOne, Editorial Manager) to enable the external  
18  
19 176 researcher (BS) to screen and randomise eligible manuscripts. In cases where this is not  
20  
21 177 possible, we will explore with individual journals if it would be possible to grant limited access  
22  
23 178 (e.g. only rights to screen studies) or to handle the different steps without access to the editorial  
24  
25 179 system (e.g. screening through automated reports; intervention provided by a journal staff  
26  
27 180 member) and that the emails for the intervention would be sent by a member of the editorial  
28  
29 181 team.  
30  
31

32 182

### 33 34 35 183 Inclusion criteria for manuscripts

- 36  
37 184 • All new manuscript submissions reporting the primary results of RCTs, which the  
38  
39 185 journal editor has decided to send out for external peer review. Since the 10 chosen  
40  
41 186 CONSORT checklist items (C-short) are applicable to different study designs, we will  
42  
43 187 include all manuscripts reporting the primary results of RCTs regardless of study design  
44  
45 188 (e.g. parallel group trial, cluster trial, superiority trial, non-inferiority/equivalence trials).

### 46 47 189 Exclusion criteria for manuscripts

- 48  
49 190 • Manuscripts clearly presenting secondary trial results, additional time points, economic  
50  
51 191 analyses, or any other analyses.
- 52  
53 192 • Manuscripts which are clearly labelled as a pilot or feasibility study or animal studies.
- 54  
55 193 • Manuscripts not sent for peer review.

56  
57  
58 194

1  
2  
3 195 Details of journal manuscript submission and peer review processes, including consent and  
4  
5 196 potential confidentiality issues will be discussed in detail with each journal by teleconference  
6  
7 197 and/or face to face prior to the journal agreeing to take part to ensure that randomisation of  
8  
9 198 manuscripts is feasible.

10  
11 199  
12  
13 200 In participating journals, the external researcher (BS) will check at least twice a week (by  
14  
15 201 screening automated submission lists) all research manuscripts that are sent out for external  
16  
17 202 peer review. As soon as the first invited peer reviewer accepts the invitation to review, the  
18  
19 203 manuscript will be randomised to the intervention or control arm (see “Randomisation” for more  
20  
21 204 details). It is possible that this process might be slightly different amongst different included  
22  
23 205 journals (e.g. that team members of a journal might be involved in the screening if limited or  
24  
25 206 no access to the journal’s editorial system is granted).

26  
27  
28 207

## 29 208 **Interventions**

30  
31 209

### 32 210 Control group: Usual practice

33  
34  
35 211 After accepting to review a manuscript, peer reviewers will receive the automated, journal  
36  
37 212 specific standard email with general information as per each journal’s usual practice (e.g.  
38  
39 213 where to access the manuscript, date the peer review report is due).

40  
41 214

### 42 215 Intervention group: C-short plus usual practice

43  
44  
45 216 After accepting to review a manuscript, peer reviewers will receive the automated, journal  
46  
47 217 specific standard email with general information (identical to control group). In addition, peer  
48  
49 218 reviewers will receive an additional email from the editorial office that includes a short version  
50  
51 219 of the CONSORT checklist (C-short) together with a brief explanation of the items either as a  
52  
53 220 table within the email or as an attachment - based on the preferences and possibilities of the  
54  
55 221 journal (Table 1, appendix 1). Peer reviewers will be asked to check whether the items in the

1  
2  
3 222 C-short checklist are addressed in the manuscript and to request authors to include these  
4  
5 223 items if they are not adequately reported. This second email (see appendix 1), containing the  
6  
7 224 C-short checklist together with a brief explanation, is not generated automatically within the  
8  
9 225 existing journal editorial systems (e.g. ScholarOne or Editorial Manager); it will be sent  
10  
11 226 manually by a researcher (BS) from the journal's editorial system or by a member of the  
12  
13 227 journal's staff. In both cases the email will appear to have come from the editorial office (not  
14  
15 228 the researcher).

17  
18 229

### 20 230 Development of the C-short checklist and explanation of items

21  
22 231 For the development of C-short we chose the 10 most important and poorly reported  
23  
24 232 CONSORT items as identified by a group of CONSORT experts in a previous study conducted  
25  
26 233 by Hopewell and colleagues.<sup>28</sup> The selection of the items was based on expert opinion and  
27  
28 234 empirical evidence whenever available.<sup>28</sup> In addition, to enable peer reviewers to better  
29  
30 235 understand the items, we added a short explanation for each of the 10 items. These short  
31  
32 236 explanations were extracted and amended from the CONSORT explanation and elaboration  
33  
34 237 paper<sup>10</sup> and from COBWEB which is an online writing aid tool.<sup>30</sup> The short explanation was  
35  
36 238 discussed and adapted by the scientific committee.

38  
39 239

## 41 240 **Outcomes**

### 44 241 Primary outcome

45  
46 242 The primary outcome of this study will be the difference in the mean proportion of adequately  
47  
48 243 reported C-short items in published articles between the two groups.

49  
50 244

### 52 245 Secondary outcomes

53  
54 246 Secondary outcomes will include the following:

- 56 247 • Mean proportion of adequately reported C-short items in published articles considering  
57  
58 248 each item separately.

- 1  
2  
3 249 • Difference in mean proportion of adequately reported C-short items in published  
4  
5 250 articles considering each sub-item (see “Assessment of outcomes”) as a separate item.  
6  
7 251 • Time from assigning an editor to the first decision (as communicated to the author after  
8  
9 252 the first round of peer-review).  
10  
11  
12 253 • Proportion of manuscripts rejected after the first round of peer review.  
13  
14 254 • Proportion of manuscripts that will be published in the journal under study.  
15  
16 255

17  
18 256 Additional outcomes:

- 19  
20 257 • Exploratory analysis of available peer reviewer comments (i.e. any references to  
21  
22 258 CONSORT).

23  
24 259 For journals where peer reviewers’ comments are subsequently published alongside the  
25  
26 260 published article, we will examine the peer reviewers’ comments for any reference to  
27  
28 261 CONSORT and trial reporting. We will contact those journals which do not make peer  
29  
30 262 reviewers’ comments publicly available, to see if reviews could be provided for such analyses  
31  
32 263 under the condition that only anonymised data will be published.  
33  
34 264

35  
36  
37 265 Assessment of outcomes:

38  
39 266 The outcomes will be assessed independently by two (blinded or at least partially blinded; see  
40  
41 267 “blinding”) outcome assessors with expertise in the design and reporting of clinical trials. Any  
42  
43 268 disagreement will be resolved by consensus or if necessary by consulting a third assessor. To  
44  
45 269 ensure consistency between reviewers, we will first pilot the data extraction form; any  
46  
47 270 disparities in the interpretation will be discussed and the data extraction form will be modified  
48  
49 271 accordingly.  
50

51  
52 272  
53  
54 273 Adequate reporting of items will be assessed in duplicate from published full-text publications  
55  
56 274 following the same instructions as provided by the CONSORT C-short checklist.<sup>10</sup> The  
57  
58 275 following checklist items have, due to their complexity, sub-items which will be extracted  
59  
60

1  
2  
3 276 separately. The sub-items are highlighted in the short explanation of the intervention (see  
4  
5 277 Table 1 and appendix 1):

- 7 278 • Outcomes (item 6a): (i) Define primary outcome, (ii) how it was measured, (iii) at what  
8  
9 279 time point, and (iv) the analysis metric (e.g. change from baseline, final value).  
11 280 • Sample size (item 7a): (i) The estimated outcomes in each group, (ii) the  $\alpha$  (type I) error  
13 281 level, (iii) the statistical power (or the  $\beta$  (type II) error level), (iv) for continuous  
15 282 outcomes, the standard deviation of the measurements  
17  
18 283 • Blinding (item 11a): Is the blinding status clear for the following persons: (i) Healthcare  
19 284 provider, (ii) patients, and (iii) outcome assessors.  
21  
22 285 • Funding (item 25): (i) The funding source, and (ii) the role of funder in the design,  
23 286 conduct, analysis, and reporting.

26 287 All items will be judged as either “yes” meaning adequately reported, “no” meaning not  
27  
28 288 adequately reported or not reported at all, or “NA” meaning that this sub-item is not applicable  
29  
30 289 for this RCT. Items with different sub-items will only be judged as adequately reported if all  
31  
32 290 relevant sub-items were adequately reported.  
33  
34

35 291  
36  
37 292 The outcomes “time from assigning an editor to the first decision”, “proportion of manuscripts  
38  
39 293 rejected after the first round of peer-review”, and “proportion of manuscripts that will be  
40  
41 294 published in the journal under study” will be extracted directly from the journal’s editorial system  
42  
43 295 or provided by the journal.  
44  
45

46 296  
47 297 **Participant timeline**

49 298 The overview of the study schedule, including enrolment, intervention and assessments is  
50  
51 299 presented in Table 2.  
52

53 300  
54  
55  
56  
57  
58  
59  
60

### 301 **Sample size**

302 For the sample size calculation, we hypothesised in a first scenario (Table 3) that the  
303 intervention C-short will result in a 25% relative increase in adequate reporting compared to  
304 the control (meaning that 70% of items will be adequately reported in the intervention group  
305 and 56% in the control group). This is based on a proportion of adequate reporting of 0.56 for  
306 the 10 most important and poorly reported items found in the control group of a previous study  
307 (meaning that a mean of 56% of the 10 most important and poorly reported items were  
308 reported).<sup>28</sup> The standard deviation (SD) in the same study was 0.23. However, we calculated  
309 our sample size to account for a slightly larger variability in our data (SD = 0.25). To  
310 demonstrate a significant difference with a power of 90% and a type 1 error at 5%, a total of  
311 136 published articles will be required in this scenario (68 per treatment arm; based on a two  
312 sided t-test).

313  
314 Two authors of this protocol, working for *PLOS ONE* (IP and AC), one of the participating  
315 journals, pointed out that 3 out of the 10 assessed items (i.e. item “Registration”, “Protocol”,  
316 and “Funding”) should always be implemented in submissions to their journal given their policy  
317 requirements for clinical trials. Assuming that this journal will recruit a high proportion of  
318 manuscripts, and that also other journals might update their templates, we increased the  
319 sample size in a second scenario, in which all these 3 items would have an overall adherence  
320 of 90% in the control arm (Table 3). This would entail an overall baseline adherence with the  
321 10 C-short items of 71%. Based on a two sided t-test, a sample size of 166 (83 per treatment  
322 arm) will have a power of 80% to find a 15% relative increase (71% adherence in control group;  
323 82% adherence in intervention group; SD = 0.25; a type 1 error at 5%).

324 Since the final sample size will be based on the number of articles published, rather than on  
325 the number of manuscripts randomised, eligible manuscripts will be randomised until 83  
326 articles are published in each arm (resulting in no less than 166 articles), to avoid loss of power  
327 due to potential imbalance between arms. Recruitment will be stopped as soon as both arms



1  
2  
3 328 reach the sample size of 83. After recruitment has stopped we will wait three months so that  
4  
5 329 manuscripts, which are still in production, can be published. Manuscripts which are published  
6  
7 330 after the three month period will be excluded  
8

9 331

### 10 332 **Randomisation and blinding**

11  
12  
13  
14 333 Manuscripts meeting the eligibility criteria and sent out for external peer review by the journals  
15  
16 334 will be randomised into one of the two groups (allocation 1:1). The randomisation list will be  
17  
18 335 created by the Study-Randomizer<sup>®</sup> system<sup>31</sup> using random block sizes between 2 and 8 and  
19  
20 336 stratified by journal. As soon as the first peer reviewer accepts the invitation, the manuscript  
21  
22 337 will be included and randomised to one of the two study arms. One of the investigators (BS)  
23  
24 338 will log onto the Study-Randomizer<sup>®</sup> system<sup>31</sup> and enter the study identification number (ID;  
25  
26 339 provided by the journal), the study title, and the journal the study was submitted to.  
27  
28 340 Subsequently, all additional peer reviewers accepting the invitation to review the same  
29  
30 341 manuscript will receive the same group assignment as the first peer reviewer.  
31

32 342

33  
34  
35 343 Authors will be blinded to the intervention. Editors will not be actively informed about the  
36  
37 344 randomisation (possible exception listed under “Interventions”). To avoid potential bias, peer  
38  
39 345 reviewers and manuscript authors will not be informed of the study hypothesis, design and  
40  
41 346 intervention.  
42

43 347

44  
45 348 Outcomes will be assessed in duplicate (see “Assessment of outcomes”). At least one outcome  
46  
47 349 assessor will be blinded. Due to restricted resources the investigator conducting the  
48  
49 350 randomisation (BS) might be involved in the data-extraction from published manuscripts.  
50

51 351

### 52 352 **Data analysis**

1  
2  
3 353 All quantitative variables will be described using means and standard deviations, or medians  
4  
5 354 and interquartile ranges in case severe departures from a normal distribution are identified.  
6  
7 355 Data distributions will be inspected visually (i.e. by histograms) instead of performing formal  
8  
9 356 statistical tests for normality. Categorical variables will be described using frequencies and  
10  
11 357 percentages. For the primary and secondary outcomes, we will estimate the mean difference  
12  
13 358 between the two groups and report them with respective 95% confidence intervals. No interim  
14  
15 359 analysis will be conducted.

16 360

### 17 18 19 20 21 361 Populations of analysis

22  
23  
24 362 The main population for analysis will be all manuscripts randomised and accepted for  
25  
26 363 publication in the participating journals. In contrast to RCTs conducted with patients, where  
27  
28 364 losses to follow-up need to be carefully considered (e.g. multiple imputation of missing data),  
29  
30 365 we are only interested in the reporting adherence of RCTs that are published. Hence we will  
31  
32 366 exclude randomised manuscripts that were not published from the main analysis. All outcomes  
33  
34 367 will be calculated based on the main population. The secondary outcome “Time to the first  
35  
36 368 decision”, will additionally be calculated considering all randomised manuscripts (including the  
37  
38 369 ones which were not published). For all analyses a p-value of 0.05 (5% significance level) will  
39  
40 370 be used to indicate statistical significance. Exact p-values will be presented up to three decimal  
41  
42 371 places. We anticipate there will be no missing data in this study, neither at the individual C-  
43  
44 372 short items, nor at the manuscript level. This is due to the study design, which will include only  
45  
46 373 the randomised manuscripts that are accepted for publication. We will analyse if the rate of  
47  
48 374 manuscripts rejected after the first round of peer-review and if the proportion of manuscripts  
49  
50 375 that will be published differentiate amongst the two study arms (both secondary results).

51 376  
52  
53  
54  
55  
56  
57  
58  
59  
60

1  
2  
3 377 Analysis of primary endpoint  
4

5 378 The effect of the intervention will be estimated as the mean difference in the proportion of C-  
6  
7 379 short items adequately reported between the study arms. If the data on the primary outcome  
8  
9 380 is normally distributed, groups will be compared using an unpaired Student's t-test. If the data  
10  
11 381 is not normally distributed, comparisons will be performed using a non-parametric equivalent  
12  
13 382 test (i.e. Wilcoxon-Mann-Whitney test).  
14  
15  
16

17 383 Analysis of secondary endpoints  
18

19  
20 384 To investigate the effect of the intervention on the secondary outcomes, mean differences with  
21  
22 385 respective 95% confidence intervals will be reported. If normality is not observed for any of the  
23  
24 386 continuous secondary outcomes, the same strategy adopted for the primary outcome (use of  
25  
26 387 a non-parametric equivalent to the Student's t-test) will be used.  
27  
28

29 388  
30

31  
32 389 Pre-specified subgroup analysis  
33

34  
35 390 No formal subgroup comparative analysis is planned for the primary or secondary outcomes.  
36  
37 391 However, the effect of the intervention on the primary outcome within subgroups will be  
38  
39 392 presented using forest plots to visually examine whether it may differ according to some  
40  
41 393 variables, such as: (1) Journals that actively implement the CONSORT Statement (defined as  
42  
43 394 requiring authors to submit a completed CONSORT checklist alongside their manuscript) vs.  
44  
45 395 journals that are not actively implementing the CONSORT Statement; (2) sample size of  
46  
47 396 included RCTs ( $n < 100$  vs.  $n \geq 100$ ); and (3) impact factor ( $<5$ ,  $5.1-10$ ;  $>10$ ) as there is  
48  
49 397 evidence that higher impact factor as well as higher sample size are associated with higher  
50  
51 398 adherence to reporting guidelines.<sup>32</sup> These analyses will be exploratory, with the aim of  
52  
53 399 supporting new hypothesis generation, rather than being conclusive.  
54  
55  
56

57 400  
58  
59  
60

1  
2  
3 401 **Data management and confidentiality**

4 402 Outcomes from publications will be assessed and extracted in duplicate. Since this information  
5  
6 403 is not confidential, we will use freely available online forms (e.g. Google forms) for data  
7  
8  
9 404 extraction from published RCTs. Data entered will be validated for completeness.

10  
11 405 Data from the journal's editorial system (e.g. title of manuscript, first author, randomisation ID,  
12  
13 406 journal, date when manuscript was assigned to an editor, date when the final decision was  
14  
15 407 made, final editorial decision, number of peer reviewers who reviewed the manuscript, the peer  
16  
17 408 review reports [if available]) will be extracted (by BS or a member of the journal's staff),  
18  
19 409 anonymised and entered in password protected files which are saved on a server from the  
20  
21 410 University of Oxford. Data will be managed and curated according to University of Oxford  
22  
23 411 regulations, which includes regular back-up (on a daily basis) of the virtual drives where the  
24  
25 412 data are stored. No auditing or data monitoring is planned (as outcomes are directly extracted  
26  
27 413 from journal's editorial system or in duplicate from published RCTs).

28  
29  
30  
31 414 The raw data extracted from the included published manuscripts can be made openly  
32  
33 415 accessible in an anonymised way (i.e. giving the included RCT a number instead of identifying  
34  
35 416 them). Derived/aggregated data, including anonymised information generated from the  
36  
37 417 journal's editorial system, will be stored and made available to the research community when  
38  
39 418 the project ends (see also "Publication policy and access to data"). Where appropriate, the  
40  
41 419 researcher who has access to the journal's editorial system (BS) and anyone else who will see  
42  
43 420 the identifiable data will sign a confidentially agreement with the participating journals,  
44  
45 421 confirming that they will not share identifiable data with any other party. Publishers such as the  
46  
47 422 BMJ state in their Company Privacy Statement that reviews and manuscripts may be used for  
48  
49 423 quality improvement purposes and that is the nature of this research. Furthermore, peer  
50  
51 424 reviewers for all BMJ journals receive the following statement in their invitation letter "*We are*  
52  
53 425 *constantly trying to find ways of improving the peer review system and have an ongoing*  
54  
55 426 *programme of research. If you do not wish your review entered into a study please let us know*  
56  
57 427 *by emailing [...] as soon as possible.*"  
58  
59  
60

428

### 429 **Trial registration**

430 This trial was denied registration on ClinicalTrials.gov as the study is not a clinical study that  
431 assesses a health outcome in human subjects. Instead we registered the trial on the Open  
432 Science Framework (<https://osf.io/c4hn8>). The first manuscript was randomised in July 2019.  
433 We expect that recruitment will be finished in summer 2021.

434

### 435 **Patient and public involvement**

436 Given the specific study topic, the steering committee agreed that patient or public involvement  
437 is not needed for this study.

438

### 439 **Discussion**

440 RCTs are the current gold standard for evaluating any new intervention in evidence-based  
441 medicine. Unfortunately, not all RCTs are of high quality. In fact, there are several well-known  
442 shortcomings with respect to reporting.<sup>3 14-19</sup> It is important to note that adhering to the  
443 CONSORT Statement does not mean that the study is of high quality. However, reporting all  
444 items from the CONSORT checklist will enable readers to adequately judge the quality of  
445 RCTs.

446

447 In this RCT we will test if a simple intervention in the form of asking peer reviewers to check  
448 whether selected CONSORT items are adequately addressed will increase the proportion of  
449 reporting completeness in the published RCTs in the participating journals. A multicentre  
450 parallel arm RCT with randomisation at the individual manuscript level was chosen instead of  
451 a cluster RCT because the risk of “contamination” at journal level was judged as low as the

18

1  
2  
3 452 intervention will be implemented by an external researcher (i.e. BS) or a member of the journal  
4  
5 453 staff (e.g. personnel from Editorial services). The likelihood of contamination due to peer  
6  
7 454 reviewers being invited to assess several RCTs and therefore becoming exposed to both  
8  
9 455 intervention arms was judged small and therefore we do not plan to adjust for clustering by  
10  
11 456 journal. Originally we planned to implement the intervention within the original instruction to  
12  
13 457 peer reviewer email which is sent out as soon as a peer reviewer accepts the invitation from  
14  
15 458 the journal. However, as these emails are sent automatically by the journal's editorial system  
16  
17 459 we would have needed to modify the software from each journal to make sure that only half of  
18  
19 460 the manuscripts administered the intervention. After our first discussion with journal editors  
20  
21 461 and journal staff, we realised that this approach is not feasible and therefore decided to  
22  
23 462 implement the intervention in the form of a separate email. We intended to conduct this RCT  
24  
25 463 in a pragmatic way so that results "would also be relevant to [...] people who decide whether  
26  
27 464 to implement the intervention on the basis of its results".<sup>33</sup> Hence we chose to assess outcomes  
28  
29 465 from published articles and not from manuscripts after the first round of revisions. Ideally, the  
30  
31 466 full impact of the intervention would also be measured including all versions of randomised  
32  
33 467 manuscripts in the final statistical analysis. However, due to confidentiality issues and limited  
34  
35 468 resources we will not be able to evaluate manuscript versions prior to publication.  
36  
37  
38  
39  
40  
41  
42  
43  
44  
45  
46  
47  
48  
49  
50  
51  
52  
53  
54  
55  
56  
57  
58  
59  
60

470 A selection of CONSORT items was chosen instead of the entire CONSORT checklist as we  
471 did not want to put too high a burden on peer reviewers, which could increase the risk that  
472 peer reviewers ignore our reminder.

473  
474 Should the proposed intervention be successful in improving the reporting quality of published  
475 RCTs, as measured by the adherence to CONSORT, the intervention could be implemented  
476 at the journal level without requiring a large amount of additional resources. In addition, very

1  
2  
3 477 similar interventions for other article types (e.g. systematic reviews, trial protocols) and  
4  
5 478 corresponding guidelines (e.g. PRISMA, SPIRIT) could be easily implemented too.  
6  
7

8 479

### 11 480 **Authors' contributions**

12 481 SH, BS, IB, MB, DM, and PR had the study idea and designed the study. SS, IP and AC  
13 482 provided expertise to ensure implementation at the journal level was possible. MMS was  
14 483 responsible for statistical aspects, including the sample size calculation and the data analysis  
15 484 plan. BS and SH wrote the first draft of the study protocol. All authors critically revised the  
16 485 protocol and approved the final version.  
17  
18  
19  
20  
21 486

### 23 487 **Roles and responsibilities**

24  
25  
26 488 The principal investigator (BS) is responsible for the preparation and the revisions of the study  
27 489 protocol, organising meetings of the steering committee, recruiting and randomising eligible  
28 490 manuscripts as well as the publication of study reports. The steering committee (IB, MB, SH,  
29 491 DM, PR, BS, MMS, and SS) is responsible for revising the protocol, defining and validating the  
30 492 additional short explanation for each CONSORT item, advising on study implementation, and  
31 493 for publishing the results of this study. MMS is responsible for the sample size calculation and  
32 494 the statistical analyses.  
33  
34  
35  
36  
37  
38  
39  
40

### 41 496 **Ethical approval**

42  
43  
44 497 Ethical approval has been obtained from the Medical Sciences Interdivisional Research Ethics  
45 498 Committee of the University of Oxford (R62779/RE001). The original approved study protocol  
46 499 is available in Appendix 2. The WHO Trial Registration Data Set is available in Appendix 3.  
47  
48  
49

50 500

### 52 501 **Competing interests**

53  
54  
55 502 SS is employed by the British Medical Journal (BMJ). IP and AC are employed by the Public  
56 503 Library of Science (PLOS). DM, SH, and IB are members of the CONSORT executive and  
57  
58  
59  
60

1  
2  
3 504 authors of the CONSORT 2010 Statement. DM and PR are members of the EQUATOR  
4  
5 505 network steering group. MMS is a meta-researcher and reporting guideline developer,  
6  
7 506 enthusiast, and disseminators, he may therefore overestimate the importance of this project.  
8  
9 507 All authors have declared that no other competing interests exist.  
10

11  
12 508

### 13 509 **Publication policy and access to data**

14  
15 510 The results from this study will be published in a peer reviewed journal irrespective of the study  
16  
17 511 results. Authorship of publications will be granted according to the criteria of the International  
18  
19 512 Committee of Medical Journal Editors (ICMJE). We plan to make the anonymised dataset,  
20  
21 513 including the data from the published articles, available as a supplementary file of the main  
22  
23 514 publication.  
24  
25  
26

27 515  
28  
29  
30  
31  
32  
33  
34  
35  
36  
37  
38  
39  
40  
41  
42  
43  
44  
45  
46  
47  
48  
49  
50  
51  
52  
53  
54  
55  
56  
57  
58  
59  
60



## References

1. Duley L, Antman K, Arena J, et al. Specific barriers to the conduct of randomized trials. *Clin Trials* 2008;5(1):40-8. doi: 10.1177/1740774507087704
2. Collins R, MacMahon S. Reliable assessment of the effects of treatment on mortality and major morbidity, I: clinical trials. *Lancet* 2001;357(9253):373-80. doi: 10.1016/S0140-6736(00)03651-5
3. Chalmers I. Unbiased, relevant, and reliable assessments in health care: important progress during the past century, but plenty of scope for doing better. *BMJ* 1998;317(7167):1167-8.
4. Altman DG, Simera I, Hoey J, et al. EQUATOR: reporting guidelines for health research. *Lancet* 2008;371(9619):1149-50. doi: 10.1016/S0140-6736(08)60505-X
5. Simera I. EQUATOR Network collates resources for good research. *BMJ* 2008;337:a2471. doi: 10.1136/bmj.a2471
6. Simera I, Altman DG. Writing a research article that is "fit for purpose": EQUATOR Network and reporting guidelines. *Evid Based Med* 2009;14(5):132-4. doi: 10.1136/ebm.14.5.132
7. Simera I, Altman DG, Moher D, et al. Guidelines for reporting health research: the EQUATOR network's survey of guideline authors. *PLoS Med* 2008;5(6):e139. doi: 10.1371/journal.pmed.0050139
8. Simera I, Moher D, Hirst A, et al. Transparent and accurate reporting increases reliability, utility, and impact of your research: reporting guidelines and the EQUATOR Network. *BMC Med* 2010;8:24. doi: 10.1186/1741-7015-8-24
9. Simera I, Moher D, Hoey J, et al. The EQUATOR Network and reporting guidelines: Helping to achieve high standards in reporting health research studies. *Maturitas* 2009;63(1):4-6. doi: 10.1016/j.maturitas.2009.03.011
10. Moher D, Hopewell S, Schulz KF, et al. CONSORT 2010 explanation and elaboration: updated guidelines for reporting parallel group randomised trials. *BMJ* 2010;340:c869. doi: 10.1136/bmj.c869
11. Schulz KF, Altman DG, Moher D, et al. CONSORT 2010 Statement: updated guidelines for reporting parallel group randomised trials. *BMC Med* 2010;8:18. doi: 10.1186/1741-7015-8-18
12. Schulz KF, Altman DG, Moher D, et al. CONSORT 2010 statement: updated guidelines for reporting parallel group randomised trials. *BMJ* 2010;340:c332. doi: 10.1136/bmj.c332
13. CONSORT Transparent Reporting of Trials. Endorsers. Journals and Organizations. <http://www.consort-statement.org/about-consort/endorsers> [accessed: 27 February 2019]
14. Chan AW, Hrobjartsson A, Haahr MT, et al. Empirical evidence for selective reporting of outcomes in randomized trials: comparison of protocols to published articles. *JAMA* 2004;291(20):2457-65. doi: 10.1001/jama.291.20.2457
15. Chalmers I, Glasziou P. Avoidable waste in the production and reporting of research evidence. *Lancet* 2009;374(9683):86-9. doi: 10.1016/S0140-6736(09)60329-9
16. Ioannidis JP, Lau J. Completeness of safety reporting in randomized trials: an evaluation of 7 medical areas. *JAMA* 2001;285(4):437-43.
17. Glasziou P, Meats E, Heneghan C, et al. What is missing from descriptions of treatment in trials and reviews? *BMJ* 2008;336(7659):1472-4. doi: 10.1136/bmj.39590.732037.47 [published Online First: 2008/06/28]
18. Boutron I, Dutton S, Ravaud P, et al. Reporting and interpretation of randomized controlled trials with statistically nonsignificant results for primary outcomes. *JAMA* 2010;303(20):2058-64. doi: 10.1001/jama.2010.651

- 1  
2  
3 568 19. Hopewell S, Dutton S, Yu LM, et al. The quality of reports of randomised trials in 2000  
4 569 and 2006: comparative study of articles indexed in PubMed. *BMJ* 2010;340:c723. doi:  
5 570 10.1136/bmj.c723  
6 571 20. Turner L, Shamseer L, Altman DG, et al. Does use of the CONSORT Statement impact  
7 572 the completeness of reporting of randomised controlled trials published in medical  
8 573 journals? A Cochrane review. *Syst Rev* 2012;1:60. doi: 10.1186/2046-4053-1-60  
9 574 21. Oduyayo A, Emdin CA, Hsiao AJ, et al. Association between trial registration and positive  
10 575 study findings: cross sectional study (Epidemiological Study of Randomized Trials-  
11 576 ESORT). *BMJ* 2017;356:j917. doi: 10.1136/bmj.j917 [published Online First:  
12 577 2017/03/16]  
13 578 22. Shamseer L, Hopewell S, Altman DG, et al. Update on the endorsement of CONSORT  
14 579 by high impact factor journals: a survey of journal "Instructions to Authors" in 2014.  
15 580 *Trials* 2016;17(1):301. doi: 10.1186/s13063-016-1408-z [published Online First:  
16 581 2016/06/28]  
17 582 23. Hopewell S, Altman DG, Moher D, et al. Endorsement of the CONSORT Statement by  
18 583 high impact factor medical journals: a survey of journal editors and journal  
19 584 'Instructions to Authors'. *Trials* 2008;9:20. doi: 10.1186/1745-6215-9-20 [published  
20 585 Online First: 2008/04/22]  
21 586 24. Hopewell S, Ravaud P, Baron G, et al. Effect of editors' implementation of CONSORT  
22 587 guidelines on the reporting of abstracts in high impact medical journals: interrupted  
23 588 time series analysis. *BMJ* 2012;344:e4178. doi: 10.1136/bmj.e4178 [published Online  
24 589 First: 2012/06/26]  
25 590 25. Blanco D, Altman D, Moher D, et al. Scoping review on interventions to improve  
26 591 adherence to reporting guidelines in health research. *BMJ Open* 2019;9(5):e026589.  
27 592 doi: 10.1136/bmjopen-2018-026589 [published Online First: 2019/05/12]  
28 593 26. Hopewell S, Collins GS, Boutron I, et al. Impact of peer review on reports of randomised  
29 594 trials published in open peer review journals: retrospective before and after study.  
30 595 *BMJ* 2014;349:g4145. doi: 10.1136/bmj.g4145  
31 596 27. Cobo E, Selva-O'Callaghan A, Ribera JM, et al. Statistical reviewers improve reporting in  
32 597 biomedical articles: a randomized trial. *PLoS One* 2007;2(3):e332. doi:  
33 598 10.1371/journal.pone.0000332 [published Online First: 2007/03/29]  
34 599 28. Hopewell S, Boutron I, Altman DG, et al. Impact of a web-based tool (WebCONSORT) to  
35 600 improve the reporting of randomised trials: results of a randomised controlled trial.  
36 601 *BMC Med* 2016;14(1):199. doi: 10.1186/s12916-016-0736-x  
37 602 29. Glonti K, Cauchi D, Cobo E, et al. A scoping review on the roles and tasks of peer  
38 603 reviewers in the manuscript review process in biomedical journals. *BMC Med*  
39 604 2019;17(1):118. doi: 10.1186/s12916-019-1347-0 [published Online First: 2019/06/21]  
40 605 30. Barnes C, Boutron I, Giraudeau B, et al. Impact of an online writing aid tool for writing a  
41 606 randomized trial report: the COBWEB (Consort-based WEB tool) randomized  
42 607 controlled trial. *BMC Med* 2015;13:221. doi: 10.1186/s12916-015-0460-y [published  
43 608 Online First: 2015/09/16]  
44 609 31. Study Randomizer. <https://studyrandomizer.com/> [accessed: 8. July 2019].  
45 610 32. Jin Y, Sanger N, Shams I, et al. Does the medical literature remain inadequately  
46 611 described despite having reporting guidelines for 21 years? - A systematic review of  
47 612 reviews: an update. *Journal of multidisciplinary healthcare* 2018;11:495-510. doi:  
48 613 10.2147/jmdh.S155103 [published Online First: 2018/10/13]  
49 614 33. Loudon K, Treweek S, Sullivan F, et al. The PRECIS-2 tool: designing trials that are fit for  
50 615 purpose. *BMJ* 2015;350:h2147. doi: 10.1136/bmj.h2147 [published Online First:  
51 616 2015/05/10]

617

618

619

1  
2  
3  
4  
5  
6  
7  
8  
9  
10  
11  
12  
13  
14  
15  
16  
17  
18  
19  
20  
21  
22  
23  
24  
25  
26  
27  
28  
29  
30  
31  
32  
33  
34  
35  
36  
37  
38  
39  
40  
41  
42  
43  
44  
45  
46  
47  
48  
49  
50  
51  
52  
53  
54  
55  
56  
57  
58  
59  
60

620 **Figure legend**

621

622 **Figure 1: Study flowchart**

623

624

For peer review only

**Table 1:** The ten most important and poorly reported CONSORT items as defined by a group of experts on the CONSORT statement.<sup>28</sup> For better understanding key features were summarised within a short explanation (extracted from the CONSORT explanation and elaboration paper<sup>10</sup> as well as from the COBWEB tool<sup>30</sup>).

| Item | Section                         | CONSORT item                                                                                                                                                                            | Short explanation                                                                                                                                                                                                                                                                                                                        |
|------|---------------------------------|-----------------------------------------------------------------------------------------------------------------------------------------------------------------------------------------|------------------------------------------------------------------------------------------------------------------------------------------------------------------------------------------------------------------------------------------------------------------------------------------------------------------------------------------|
| 1    | Outcomes (6a)                   | Completely defined pre-specified primary outcome measure, including how and when it was assessed                                                                                        | Is it clear (1) what the primary outcome is (usually the one used in the sample size calculation), (2) how it was measured (if relevant; e.g. which score used), (3) at what time point, and (4) what the analysis metric was (e.g. change from baseline, final value)?                                                                  |
| 2    | Sample size (7a)                | How sample size was determined                                                                                                                                                          | Is there a clear description of how the sample size was determined, including (1) the estimated outcomes in each group; (2) the $\alpha$ (type I) error level; (3) the statistical power (or the $\beta$ (type II) error level); and (4) for continuous outcomes, the standard deviation of the measurements?                            |
| 3    | Sequence generation (8a)        | Method used to generate random allocation sequence                                                                                                                                      | Does the description make it clear if the “assigned intervention is determined by a chance process and cannot be predicted”?                                                                                                                                                                                                             |
| 4    | Allocation concealment (9)      | Mechanism used to implement random allocation sequence (such as sequentially numbered containers), describing any steps taken to conceal the sequence until interventions were assigned | Is it clear how the care provider enrolling participants was made ignorant of the next assignment in the sequence (different from blinding)? Possible methods can rely on centralised or “third-party” assignment (i.e., use of a central telephone randomisation system, automated assignment system, sealed containers).               |
| 5    | Blinding (11a)                  | If done, who was blinded after assignment to interventions (for example, participants, care providers, those assessing outcomes)                                                        | Is it clear if (1) healthcare providers, (2) patients, and (3) outcome assessors are blinded to the intervention? General terms such as “double-blind” without further specifications should be avoided.                                                                                                                                 |
| 6    | Outcomes and estimation (17a/b) | For the primary outcome, results for each group, and the estimated effect size and its precision (such as 95% confidence intervals)                                                     | Is the estimated effect size and its precision (such as standard deviation or 95% confidence intervals) for each treatment arm reported? When the primary outcome is binary, both the relative effect (risk ratio, relative risk) or odds ratio) and the absolute effect (risk difference) should be reported with confidence intervals. |
| 7    | Harms (19)                      | All-important harms or unintended effects in each group                                                                                                                                 | Is the number of affected persons in each group, the severity grade (if relevant) and the absolute risk (e.g. frequency of incidence) reported? Are the number of serious, life threatening events and deaths reported? If no adverse event occurred this should be clearly stated.                                                      |
| 8    | Registration (23)               | Registration number and name of trial registry                                                                                                                                          | Is the registry and the registration number reported? If the trial was not registered, it should be explained why.                                                                                                                                                                                                                       |
| 9    | Protocol (24)                   | Where trial protocol can be accessed                                                                                                                                                    | Is it stated where the trial protocol can be assessed (e.g. published, supplementary file, repository, directly from author, confidential and therefore not available)?                                                                                                                                                                  |
| 10   | Funding (25)                    | Sources of funding and other support (such as supply of drugs) and role of funders                                                                                                      | Are (1) the funding sources, and (2) the role of the funder(s) described?                                                                                                                                                                                                                                                                |

630 **Table 2:** Study schedule

|                                                                                     | <b>Enrolment</b>                                  | <b>Allocation and intervention</b>                  | <b>Intervention</b>                                            | <b>Post-intervention</b>         |                              |
|-------------------------------------------------------------------------------------|---------------------------------------------------|-----------------------------------------------------|----------------------------------------------------------------|----------------------------------|------------------------------|
| Time-point                                                                          | <i>Studies which are sent out for peer-review</i> | <i>After first peer-reviewer accepts invitation</i> | <i>Whenever an additional peer-reviewer accepts invitation</i> | <i>First decision by journal</i> | <i>Published manuscripts</i> |
| Eligibility screen                                                                  | X                                                 |                                                     |                                                                |                                  |                              |
| Allocation                                                                          |                                                   | X                                                   |                                                                |                                  |                              |
| Intervention:                                                                       |                                                   |                                                     |                                                                |                                  |                              |
| C-short + usual care                                                                |                                                   | X                                                   | X                                                              |                                  |                              |
| Usual care                                                                          |                                                   | X                                                   | X                                                              |                                  |                              |
| Assessment of trial characteristics:                                                |                                                   |                                                     |                                                                |                                  |                              |
| Funding source                                                                      |                                                   |                                                     |                                                                |                                  | X                            |
| Study centres (single centre or multicentre)                                        |                                                   |                                                     |                                                                |                                  | X                            |
| Sample size                                                                         |                                                   |                                                     |                                                                |                                  | X                            |
| Study design (e.g. parallel arm, crossover)                                         |                                                   |                                                     |                                                                |                                  | X                            |
| Hypothesis (e.g. superiority, non-inferiority)                                      |                                                   |                                                     |                                                                |                                  | X                            |
| Medical field                                                                       |                                                   |                                                     |                                                                |                                  | X                            |
| Intervention tested                                                                 |                                                   |                                                     |                                                                |                                  | X                            |
| Number of trial arms                                                                |                                                   |                                                     |                                                                |                                  | X                            |
| Number of peer-reviewers                                                            |                                                   |                                                     |                                                                |                                  | X                            |
| Journal which published the manuscript                                              |                                                   |                                                     |                                                                |                                  | X                            |
| Number of journals requesting CONSORT adherence (submission of checklist mandatory) |                                                   |                                                     |                                                                |                                  | X                            |
| Assessment of outcomes:                                                             |                                                   |                                                     |                                                                |                                  |                              |
| Time from assigning an academic editor until the first decision                     |                                                   |                                                     |                                                                | X                                |                              |
| Proportion of manuscripts directly rejected after the first round of peer-review    |                                                   |                                                     |                                                                | X                                |                              |
| Proportion of manuscripts that will be published in the journal under study         |                                                   |                                                     |                                                                |                                  | X                            |
| Adherence to CONSORT items and sub-items                                            |                                                   |                                                     |                                                                |                                  | X                            |

631

632 **Table 3:** Assumptions for sample size calculations in two different scenarios.

| Item           | CONSORT item                  | Scenario 1. Adequate reporting as published in WebCONSORT <sup>28</sup> | Scenario 2. Adapted from Scenario 1 |
|----------------|-------------------------------|-------------------------------------------------------------------------|-------------------------------------|
| 1              | Outcomes (6a)                 | 77% (79 of 103)                                                         | 77% (79 of 103)                     |
| 2              | Sample size (7a)              | 83% (85 of 103)                                                         | 83% (85 of 103)                     |
| 3              | Sequence generation (8a)      | 76% (78 of 103)                                                         | 76% (78 of 103)                     |
| 4              | Allocation concealment (9)    | 55% (57 of 103)                                                         | 55% (57 of 103)                     |
| 5              | Blinding (11a)                | 35% (36 of 103)                                                         | 35% (36 of 103)                     |
| 6              | Outcomes and estimation (17a) | 44% (45 of 103)                                                         | 44% (45 of 103)                     |
| 7              | Harms (19)                    | 71% (73 of 103)                                                         | 71% (73 of 103)                     |
| 8              | Registration (23)             | 69% (71 of 103)                                                         | 90%                                 |
| 9              | Protocol (24)                 | 19% (20 of 103)                                                         | 90%                                 |
| 10             | Funding (25)                  | 34% (35 of 103)                                                         | 90%                                 |
| <b>Overall</b> |                               | <b>56%</b>                                                              | <b>71%</b>                          |

633 Abbreviation: CONSORT= CONSolidated Standards for Reporting Trials

634

1  
2  
3  
4  
5  
6  
7  
8  
9  
10  
11  
12  
13  
14  
15  
16  
17  
18  
19  
20  
21  
22  
23  
24  
25  
26  
27  
28  
29  
30  
31  
32  
33  
34  
35  
36  
37  
38  
39  
40  
41  
42  
43  
44  
45  
46  
47  
48  
49  
50  
51

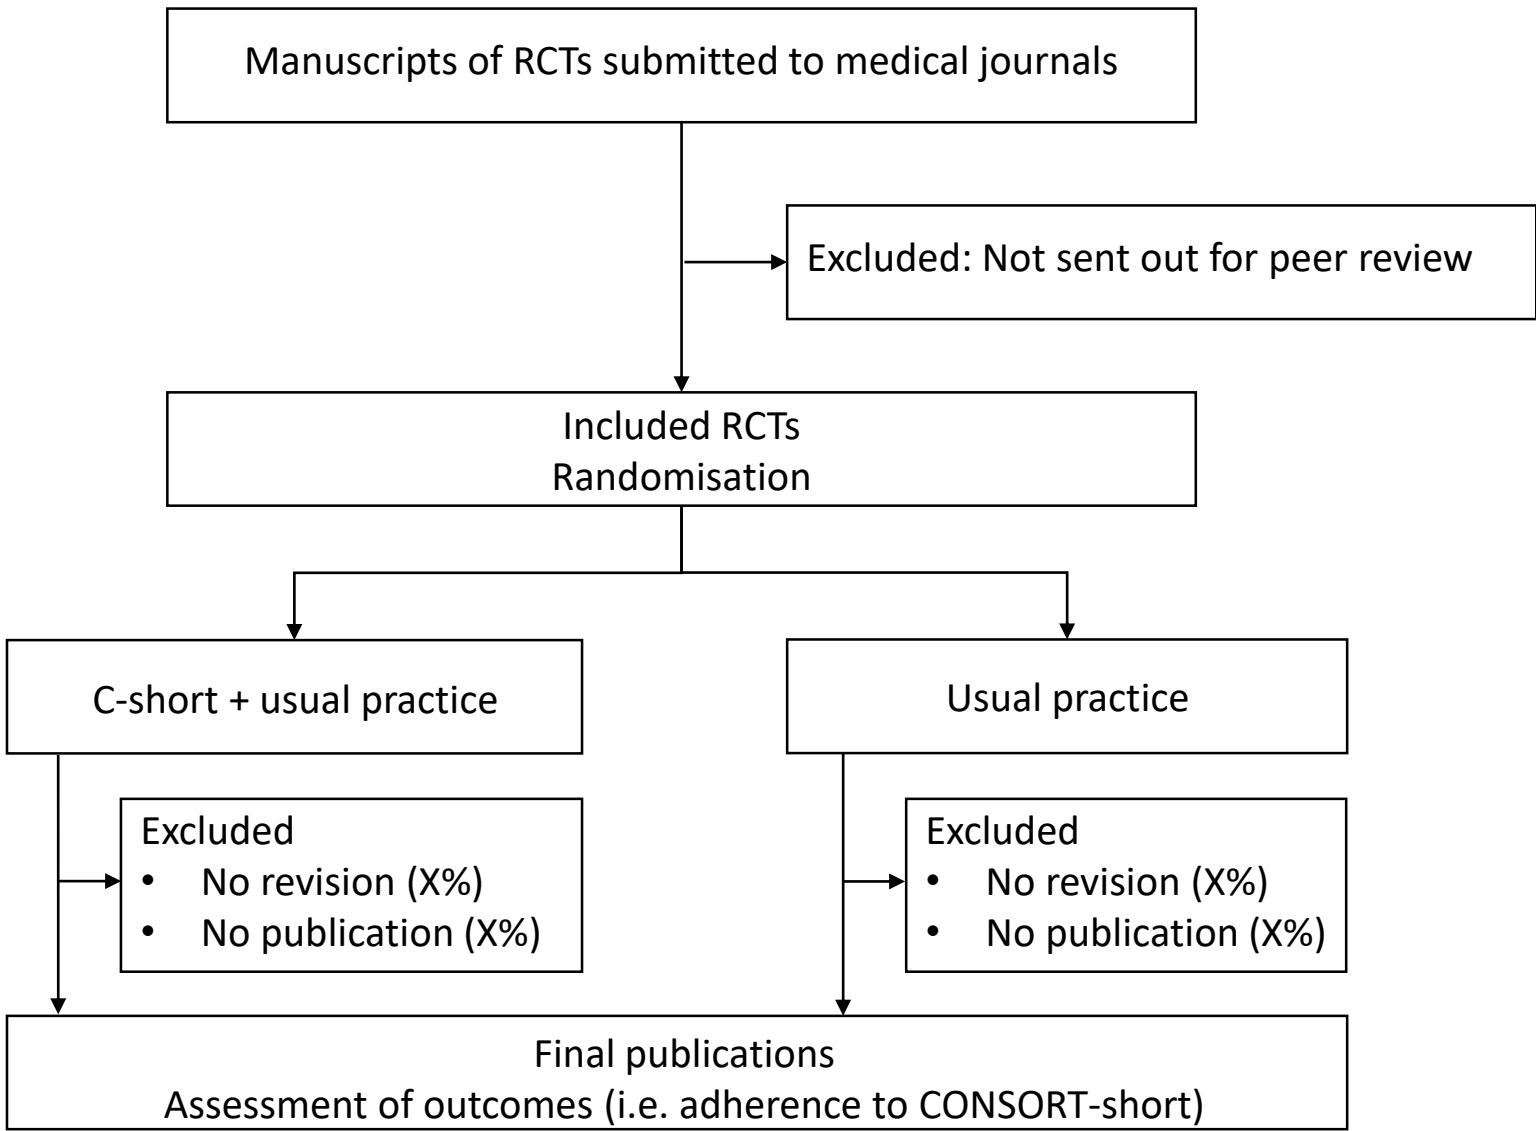

1  
2  
3 **Impact of a short version of the CONSORT checklist for peer reviewers to improve the**  
4 **reporting of randomised controlled trials published in biomedical journals: study**  
5 **protocol for a randomised controlled trial**  
6  
7  
8  
9

10 Benjamin Speich, Sara Schroter, Matthias Briel, David Moher, Iratxe Puebla, Alejandra Clark,  
11  
12 Michael M Schlusser, Philippe Ravaud, Isabelle Boutron, Sally Hopewell  
13  
14  
15  
16  
17

18 **Appendix**  
19  
20  
21

22 **Appendix 1:** Example of the email which will be sent out in the intervention arm (C-Short).  
23 The exact wording might be slightly adapted according to the journal preferences.  
24

25 *Page 2*  
26

27 **Appendix 2:** Original study protocol as it was approved by the Medical Sciences  
28 Interdivisional Research Ethics Committee of the University of Oxford (R62779/RE001).  
29

30 *Page 3*  
31

32 **Appendix 3:** WHO Trial Registration Data Set (Version 1.3.1)  
33

34 *Page 27*  
35  
36  
37  
38  
39  
40  
41  
42  
43  
44  
45  
46  
47  
48  
49  
50  
51  
52  
53  
54  
55  
56  
57  
58  
59  
60



**Appendix 1:** Example of the email which will be sent out in the intervention arm (C-Short).  
The exact wording might be slightly adapted according to the journal preferences.

Dear *\*Title, Name\**,

We thank you for accepting to peer-review a manuscript for *\*journal name\**. As we are trying to improve the reporting for randomised controlled trials according to the CONSORT guidelines, we would like to ask if you could check whether the following most important and poorly reported items are adequately implemented as indicated in the *table below/attached table*.

| Item | Section                         | CONSORT item                                                                                                                                                                            | Short explanation                                                                                                                                                                                                                                                                                                                        |
|------|---------------------------------|-----------------------------------------------------------------------------------------------------------------------------------------------------------------------------------------|------------------------------------------------------------------------------------------------------------------------------------------------------------------------------------------------------------------------------------------------------------------------------------------------------------------------------------------|
| 1    | Outcomes (6a)                   | Completely defined pre-specified primary outcome measure, including how and when they were assessed                                                                                     | Is it clear (1) what the primary outcome is (usually the one used in the sample size calculation), (2) how it was measured (if relevant; e.g. which score used), (3) at what time point, and (4) what the analysis metric was (e.g. change from baseline, final value)?                                                                  |
| 2    | Sample size (7a)                | How sample size was determined                                                                                                                                                          | Is there a clear description of how the sample size was determined, including (1) the estimated outcomes in each group; (2) the $\alpha$ (type I) error level; (3) the statistical power (or the $\beta$ (type II) error level); and (4) for continuous outcomes, the standard deviation of the measurements?                            |
| 3    | Sequence generation (8a)        | Method used to generate random allocation sequence                                                                                                                                      | Does the description make it clear if the "assigned intervention is determined by a chance process and cannot be predicted"?                                                                                                                                                                                                             |
| 4    | Allocation concealment (9)      | Mechanism used to implement random allocation sequence (such as sequentially numbered containers), describing any steps taken to conceal the sequence until interventions were assigned | Is it clear how the care provider enrolling participants was made ignorant of the next assignment in the sequence (different from blinding)? Possible methods can rely on centralised or "third-party" assignment (i.e., use of a central telephone randomisation system, automated assignment system, sealed containers).               |
| 5    | Blinding (11a)                  | If done, who was blinded after assignment to interventions (for example, participants, care providers, those assessing outcomes)                                                        | Is it clear if (1) healthcare providers, (2) patients, and (3) outcome assessors are blinded to the intervention? General terms such as "double-blind" without further specifications should be avoided.                                                                                                                                 |
| 6    | Outcomes and estimation (17a/b) | For the primary outcome, results for each group, and the estimated effect size and its precision (such as 95% confidence intervals)                                                     | Is the estimated effect size and its precision (such as standard deviation or 95% confidence intervals) for each treatment arm reported? When the primary outcome is binary, both the relative effect (risk ratio, relative risk) or odds ratio) and the absolute effect (risk difference) should be reported with confidence intervals. |
| 7    | Harms (19)                      | All-important harms or unintended effects in each group                                                                                                                                 | Is the number of affected persons in each group, the severity grade (if relevant) and the absolute risk (e.g. frequency of incidence) reported? Are the number of serious, life threatening events and deaths reported? If no adverse event occurred this should be clearly stated.                                                      |
| 8    | Registration (23)               | Registration number and name of trial registry                                                                                                                                          | Is the registry and the registration number reported? If the trial was not registered, it should be explained why.                                                                                                                                                                                                                       |
| 9    | Protocol (24)                   | Where trial protocol can be accessed                                                                                                                                                    | Is it stated where the trial protocol can be assessed (e.g. published, supplementary file, repository, directly from author, confidential and therefore not available)?                                                                                                                                                                  |
| 10   | Funding (25)                    | Sources of funding and other support (such as supply of drugs) and role of funders                                                                                                      | Are (1) the funding sources, and (2) the role of funder(s) described?                                                                                                                                                                                                                                                                    |

Your efforts are highly appreciated.

Kind regards,

*\*journal name\**-Team

**Appendix 2:** Original study protocol as it was approved by the Medical Sciences Interdivisional Research Ethics Committee of the University of Oxford (R62779/RE001).

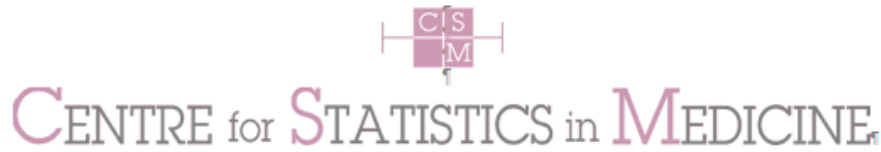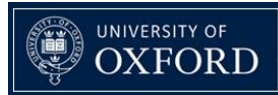

**Impact of a short form of the CONSORT checklist for peer reviewers to improve the reporting of randomised controlled trials published in biomedical journals: a randomised controlled trial**

**Short title: CONSORT for Peer Review (CONSORT-PR)**

Principal investigator: Dr Benjamin Speich  
Centre for Statistics in Medicine, University of Oxford

Dr Benjamin Speich  
Centre for Statistics in Medicine,  
Botnar Research Centre, University of Oxford, Windmill Road, Oxford OX3 7LD  
Email: Benjamin.speich@ndorms.ox.ac.uk

**SCIENTIFIC COMMITTEE**

Prof Isabelle Boutron, Paris Descartes University, France  
Prof Matthias Briel, University of Basel, Switzerland  
Associate Prof Sally Hopewell, Centre for Statistics in Medicine, Oxford University, UK  
Prof David Moher, Centre for Journalology, Clinical Epidemiology Program, Ottawa Hospital  
Research Institute, Canada  
Prof Philippe Ravaud, Paris Descartes University, France  
Dr Benjamin Speich, Centre for Statistics in Medicine, University of Oxford, UK  
Dr. Michael M Schlüssel, Centre for Statistics in Medicine, University of Oxford, UK

Dr Sara Schroter, The BMJ, London, UK

**Trial registration:** This trial will be prospectively registered under [clinicaltrials.gov](http://clinicaltrials.gov).

**Protocol version:** Version 1.1 2019-05-21

**Funding:** Benjamin Speich is supported by an Advanced Postdoc.Mobility grant from the Swiss National Science Foundation (P300PB\_177933). David Moher is supported by a University Research Chair, Ottawa. The funders had no role in designing the study and will also have no role in conducting the study as well as in analysing and reporting study results.

**Roles and responsibilities:**

Contributors: SH, BS, IB, MB, DM, PR, had the study idea and designed the study. SS provided expertise to ensure implementation at the journal level was possible. MMS was responsible for statistical aspects, including the sample size calculation and the data analysis plan. BS and SH wrote the first draft of the study protocol. All authors critically revised the protocol and approved the final version.

Sponsor and contact information: Centre for Statistics in Medicine, Botnar Research Centre, University of Oxford, Windmill Road, Oxford OX3 7LD. Principal investigator: Benjamin Speich (Email: [Benjamin.speich@ndorms.ox.ac.uk](mailto:Benjamin.speich@ndorms.ox.ac.uk))

Sponsor and funders: The funders had no role in designing the study and will also have no role in conducting the study as well as in analysing and reporting study results.

Roles and responsibilities: The principal investigator (BS) is responsible for the preparation and the revisions of the study protocol, organising meetings of the steering committee, recruiting and randomizing eligible manuscripts as well as the publication of study reports. The steering committee (IB, MB, SH, DM, PR, BS, MMS, and SS) is in charge of participating in the elaboration of the protocol, defining and validating the additional short explanation for each CONSORT item, following the evolution of the committed study and for publishing the results of this study. MMS is responsible for the sample size calculation and the statistical analyses.

**Table of content:**

|                                                                                           |    |
|-------------------------------------------------------------------------------------------|----|
| <b>1. BACKGROUND AND RATIONAL</b> .....                                                   | 6  |
| 1.1 Need for clinical research and epidemiologic transparency .....                       | 6  |
| 1.2 Transparency in published randomised controlled trials .....                          | 6  |
| 1.3 Journal attempts to improve reporting in published randomised controlled trials ..... | 7  |
| <b>2. HYPOTHESIS</b> .....                                                                | 8  |
| <b>3. OBJECTIVE</b> .....                                                                 | 8  |
| 3.1 Main objective .....                                                                  | 8  |
| <b>4. METHODS</b> .....                                                                   | 9  |
| 4.1 Trial design .....                                                                    | 9  |
| 4.2 Study setting and eligibility criteria .....                                          | 9  |
| 4.3 Interventions .....                                                                   | 10 |
| 4.4 Outcomes .....                                                                        | 13 |
| 4.5 Participant timeline.....                                                             | 14 |
| 4.6. Sample size .....                                                                    | 16 |
| 4.7 Randomisation and blinding .....                                                      | 17 |
| 4.8 Statistical methods.....                                                              | 18 |
| 4.8.1 Populations of analysis .....                                                       | 18 |
| 4.8.2 Data analysis.....                                                                  | 19 |
| 4.8.3 Analysis of primary endpoint.....                                                   | 19 |
| 4.8.4 Analysis of secondary endpoints .....                                               | 19 |
| <b>5 LEGAL AND GENERAL LOGISTICS</b> .....                                                | 20 |
| 5.1. Organisation of study .....                                                          | 20 |
| 5.1.1 Coordinating centre .....                                                           | 20 |
| 5.1.2 Scientific committee.....                                                           | 20 |
| 5.2. Regulatory aspects .....                                                             | 21 |
| <b>6 PUBLICATION POLICY AND ACCESS TO DATA</b> .....                                      | 22 |
| <b>REFERENCES</b> .....                                                                   | 23 |
| <b>APPENDIX</b> .....                                                                     | 26 |

## 1. Background and rational

### 1.1 Need for clinical research and epidemiologic transparency

There is substantial agreement that well conducted and reported randomised controlled trials (RCTs) generate the most trustworthy evidence when newly developed or already existing clinical interventions are evaluated (1-3). Besides the complexity and the high associated costs of conducting RCTs (4-6), there are major issues with their reporting that often make it difficult for researchers, clinicians, patients or policymakers to interpret the current evidence on a specific topic (7, 8). Chronologically, the most prominent difficulties in reporting consist of (i) poor reporting in study protocols for RCTs (9-12); (ii) a substantial fraction of trials are not registered, prematurely discontinued (most common due to difficulties with recruitment) and not published (13, 14); and (iii) that published RCTs are often poorly reported (7).

For clinicians, scientists and decision makers, published articles are often the only way to know how a study was conducted. In order to judge the internal and external validity of RCTs, it is crucial that these articles present transparent, accurate and unbiased information about the methods and conduct of the RCT.

### 1.2 Transparency in published randomised controlled trials

To improve the transparency in clinical and epidemiological research the international organisation called the EQUATOR (Enhancing the Quality and Transparency of Research) Network was founded in 2006 (15-20). This international network consists of researchers, epidemiologists, people in charge of recommendations for the presentation of articles or "reporting guidelines", statisticians, clinicians and editors from some of the most prestigious journals (e.g., *Lancet*, *JAMA*, *Annals of Internal Medicine*, *BMJ*).

The CONSORT Statement (CONsolidated Standards for Reporting Trials), is perhaps the most important reporting guideline designed to help improve the transparency and quality of reporting of RCTs (21, 22). The CONSORT Statement, consisting of 25 items and a flow diagram which should be reported in papers describing RCTs. The last update of the CONSORT Statement was published simultaneously in 10 leading medical journals in 2010 (23). Currently CONSORT is endorsed by 585 journals (24). The CONSORT Statement guides authors, peer reviewers and journal editors on what information should be included in published reports of RCTs in order to facilitate critical judgment and interpretation of results. It is important to note, that adhering to the CONSORT Statement does not mean that the study is of high quality. However, reporting all items from the CONSORT list will enable readers to adequately judge the quality of RCTs.

1  
2  
3 A number of research studies have identified serious limitations in the reporting of published  
4 RCTs (3, 25-30). Despite some improvement in reporting following the implementation of the  
5 CONSORT Statement, there still remain major reporting deficiencies in published RCTs (31).  
6 For example, Odutayo and colleagues showed that a large proportion of RCTs published in  
7 December 2012 in PubMed did not define the primary outcome (31%), did not state the sample  
8 size calculation (45%) and did not explain the method of allocation concealment (50%) (32).  
9 This lack of transparency is a major limiting factor for the reader who assesses an article in  
10 order to find the answer to a specific question; it is also a major problem for scientists who  
11 perform systematic reviews and meta-analyses. Thus, some published trials may not be  
12 included in the meta-analysis because of their lack of transparency. Chan showed (25, 33) that  
13 50% of efficacy outcomes and 65% of safety outcomes could not be included in meta-analyses  
14 because of how they were reported. Furthermore, even if these trials are included in systematic  
15 reviews and meta-analyses, an adequate risk of bias assessment is often not possible due to  
16 the poor reporting quality. Nevertheless, the main consequence of the lack of transparency is  
17 the risk of accepting treatments that are ineffective or cause serious adverse events (34).  
18  
19  
20  
21  
22  
23  
24  
25  
26  
27

### 28 1.3 Journal attempts to improve reporting in published randomised controlled trials

29  
30 Journals can play a vital role in improving the reporting of published reports of RCTs. For  
31 example, a survey of authors' instructions on journal websites revealed that in 2014 63% (106  
32 of 168) of biomedical journals mentioned CONSORT within their "Instructions to Authors" (35).  
33 Of those journals 38 (36%) required a CONSORT checklist as a condition of RCT report  
34 submission. Such implementation indicates some improvement over time compared to an  
35 assessment in 2007 when only 17 journals requested the CONSORT checklist (36). An  
36 interrupted time series analysis which assessed if the CONSORT for Abstracts guideline had  
37 an effect on the reporting quality, found that results are better reported in Journals which  
38 enforce the policy (37).  
39  
40  
41  
42  
43  
44

45  
46 In a study published in 2016 authors of RCTs were asked by journal editors to use the web-  
47 based CONSORT tool at the manuscript revision stage (38). Authors who were randomly  
48 allocated to the intervention had access to a tool which allowed them to combine different  
49 CONSORT extensions (according to study design, medical field) to generate customised  
50 checklists. In the control group, authors had access to a CONSORT flow diagram generator.  
51 The goal was to improve the reporting of CONSORT items with a simple webtool. However, a  
52 quarter of all authors either wrongly selected a CONSORT extension or failed to select an  
53 extension, indicating that further education is needed in terms of when and how to implement  
54 CONSORT extensions.  
55  
56  
57  
58  
59  
60

1  
2  
3 A systematic scoping review conducted in 2017 by Blanco and colleagues summarised  
4 different interventions aimed to improve adherence to reporting guidelines (39) (manuscript  
5 with results currently under review. Draft received via personal communication). A number of  
6 different interventions were identified and some had also been tested at journals. However,  
7 the interventions, besides requesting submission of checklists from authors, required  
8 additional resources at the journal level (e.g. internal peer review by editorial assistants or  
9 inviting an additional statistical peer-reviewer (40, 41)). Therefore, it is unlikely that these  
10 interventions will be implemented in the vast majority of journals, especially not in smaller  
11 journals with limited resources. A study examining “the nature and extent of changes made to  
12 manuscripts after peer review, in relation to the reporting of methodological aspects of RCTs”  
13 and “the type of changes requested by peer reviewers” found that peer review did lead to some  
14 improvement in reporting (40).

15  
16 Building on these findings we plan to evaluate the impact of inviting peer reviewers to explicitly  
17 use a short version of the CONSORT checklist (including a short explanation of those items)  
18 as part of their review process. If this intervention deems to be effective, it could be easily  
19 implemented by all medical journals without needing additional resources at a journal level.

## 2. Hypothesis

20  
21 We propose an RCT to evaluate the impact of asking peer reviewers to use a short version of  
22 the CONSORT checklist when reviewing a manuscript of an RCT and whether it improves the  
23 completeness of reporting. Our hypothesis is that reminding peer reviewers of the CONSORT  
24 items (including a short explanation of those items) will result in higher adherence to  
25 CONSORT guidelines in published RCTs. We only selected a limited number of the CONSORT  
26 items because we did not want to deter peer reviewers with too much information. Since peer  
27 reviewing in general can be burdensome, we felt that this approach is more promising than  
28 listing all items, risking that the information will be ignored. The short version of the CONSORT  
29 checklist is based on the same items described in a previous study as the 10 most important  
30 and underreported CONSORT items (38).

## 3. Objective

### 3.1 Main objective

31  
32 The main objective of this study is to evaluate the impact of asking peer reviewers during the  
33 standard peer-review process to ask them to use a short version of the CONSORT checklist  
34 (C-short) and whether it will improve the reporting in published RCTs compared to manuscripts  
35 where the peer reviewers underwent usual practice.



## 4. Methods

### 4.1 Trial design

This study is a multicentre RCT with articles being the unit of randomisation (Figure 1; allocation ratio 1:1). A multicentre parallel arm RCT with randomisation at the individual article level was chosen instead of a cluster RCT because the risk of any “contamination” on journal level is not given as the intervention will be implemented by an external researcher (i.e. BS). The possibility of contamination due to the possibility that peer reviewer are invited to assess several RCTs and are randomised into both arms was judged as relatively small and therefore we do not plan to adjust for clustering by journal. The journal staff (i.e. editors) will not be actively told which manuscript was allocated to the proposed intervention and which to the control group.

**Figure 1:** Study flowchart

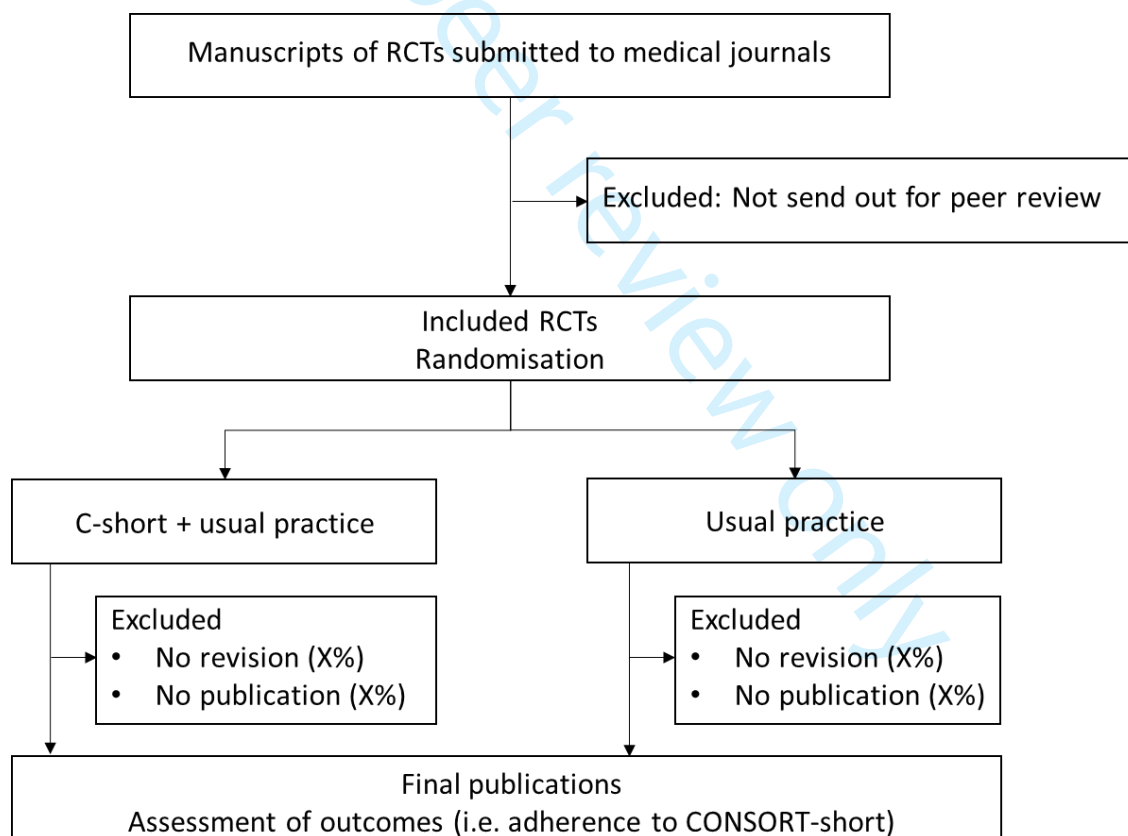

### 4.2 Study setting and eligibility criteria

The population will be defined on two levels. Included journals and included articles.

Included journals must: i) endorse the CONSORT Statement (e.g. assessed via journals Instruction to Authors); ii) publish primary results of at least five RCTs in 2017 (identified in a brief PubMed search as publishing RCTs in 2017). To be efficient, we plan to contact (via



1  
2  
3 email) the editors of eligible journals within a publishing house (i.e. journals which are part of  
4 the BMJ series, BMC series, PLoS, Lancet, JAMA) instead of separate journals. A description  
5 of the requirements for participation and a short summary information sheet will be included  
6 as part of the email invitation sent to journal editors. If a journal is eligible, and agrees to take  
7 part, the journal will also need to provide access to their journal editorial system (e.g.  
8 ScholarOne, Editorial Manager) to enable the external researcher (i.e. BS) to screen and  
9 randomise eligible manuscripts. In cases this is not possible, we will explore with separate  
10 journals if it would be possible to grant limited access (e.g. only rights to screen studies) and  
11 that the emails from the intervention would be sent by a person from the editorial team.  
12  
13  
14  
15  
16  
17  
18

19 We will include all submitted manuscripts reporting RCTs for which the journal decides to send out for  
20 external peer review. Since the 10 chosen CONSORT checklist items are applicable to different study  
21 designs, we will include all RCTs regardless of study design (e.g. parallel group trial, cluster trial,  
22 superiority trial, non-inferiority trial). Articles presenting clearly secondary trial results, additional time  
23 points, economic analyses, or any other analyses derived from an RCT dataset not including the study's  
24 main results will be excluded. Furthermore, RCTs which are clearly labelled as a pilot or feasibility study  
25 or randomise animals or cells instead of individuals will be excluded.  
26  
27  
28  
29

30 Details of journal manuscript submission and peer review processes, including, consent and  
31 potential confidentiality issues will be discussed in detail with each journal by teleconference  
32 and/or face to face prior to the journal agreeing to take part to ensure that randomisation of  
33 manuscripts is feasible. We considered conducting randomisation at the level of the journal  
34 (i.e. cluster RCTs). However, in order to make the intervention as easy and simple to  
35 implement (and with little or no additional effort from the journal) we believe that randomisation  
36 at the manuscript level - with an external researcher implementing the intervention within the  
37 existing journal management systems - will be the most efficient study design.  
38  
39  
40  
41  
42  
43  
44

45 In participating journals, the external investigator (BS) will have access to the editorial  
46 management software (e.g. ScholarOne or Editorial Manager) and will check at least twice a  
47 week (using automated report lists) all research manuscripts that are sent out for external peer  
48 review. As soon as the first peer-reviewer accepts the invitation to review, the manuscript will  
49 be randomised to the intervention or control arm (see "Randomisation" for more details). It is  
50 possible that this process might be slightly different amongst different included journals.  
51  
52  
53  
54  
55

#### 56 4.3 Interventions

57  
58  
59 Experimental group: C-short plus usual practice  
60

1  
2  
3 After accepting to review an article, peer reviewers will receive the automated, journal specific  
4 standard email with general information as per each journal's usual practice (e.g. where to  
5 access the manuscript, date when the peer review report is due). In addition, peer-reviewers  
6 who received a manuscript which was randomised to C-short will receive an additional email  
7 including a short version of the CONSORT checklist (C-short) (either within the email or as  
8 an attachment; based on the preferences and possibilities of the journal) focusing on the 10  
9 most important and most poorly reported items (Table 1; as previously defined by a group of  
10 experts of the CONSORT Group (38)). Peer-reviewers will be asked to pay particular attention  
11 to items in the C-short checklist and request authors to report on these items, if not already  
12 adequately reported. This second email, containing the C-short checklist, is not generated  
13 automatically within the existing journal editorial management system (e.g. ScholarOne or  
14 Editorial Manager); it will be sent by the investigator who has access to the journal editorial  
15 system (BS). An example of this additional email is presented within the appendix (appendix  
16 1; the exact wording might be changed according to the preferences of the participating  
17 journals). At least twice a week the editorial management system will be checked for each  
18 journal and if a peer reviewer has accepted an invitation to review, an email containing the C-  
19 short intervention will be generated and sent. It might be possible that some journals will only  
20 provide the right to access and read manuscripts in the editorial management system, but not  
21 to send emails. If this is the case, the corresponding Editor (or designated person within the  
22 journal) will be informed to send the emails.  
23  
24  
25  
26  
27  
28  
29  
30  
31  
32  
33  
34  
35

#### Development and testing of the short explanation of the C-short items:

36 We chose the 10 most important and poorly reported CONSORT items as identified by a group  
37 of CONSORT experts in a previous study conducted by Hopewell and colleagues (38). The  
38 selection of the items was based on expert opinion and empirical evidence whenever available  
39 (38). In addition, we have added a short explanation for each of the 10 items. These short  
40 explanations were extracted and amended from the CONSORT explanation and elaboration  
41 paper (21) and from COBWEB which is online writing aid tool (42). The short explanation was  
42 discussed and adapted by the scientific committee.  
43  
44  
45  
46  
47  
48  
49

#### Control group: Usual practice:

50 After accepting to review an article, peer reviewers will receive the automated, journal specific  
51 standard email with general information as per each journal's usual practice (e.g. where to  
52 access the manuscript, date until when the peer review report is due). However, they will not  
53 receive the second email, sent by the investigator who has access to the journal editorial  
54 system (BS) which contains the C-short checklist.  
55  
56  
57  
58  
59  
60

**Table 1:** The ten most important and poorly reported CONSORT items as defined by a group of experts on the CONSORT statement (38). For better understanding key features were summarised within a short explanation (extracted from the CONSORT explanation and elaboration paper (21) as well as from the COBWEB tool (42)).

| Item | Section                         | CONSORT item                                                                                                                                                                            | Short explanation                                                                                                                                                                                                                                                                                                                        |
|------|---------------------------------|-----------------------------------------------------------------------------------------------------------------------------------------------------------------------------------------|------------------------------------------------------------------------------------------------------------------------------------------------------------------------------------------------------------------------------------------------------------------------------------------------------------------------------------------|
| 1    | Outcomes (6a)                   | Completely defined pre-specified primary outcome measure, including how and when they were assessed                                                                                     | Is it clear (1) what the primary outcome is (usually the one used in the sample size calculation), (2) how it was measured (if relevant; e.g. which score used), (3) at what time point, and (4) what the analysis metric was (e.g. change from baseline, final value)?                                                                  |
| 2    | Sample size (7a)                | How sample size was determined                                                                                                                                                          | Is there a clear description of how the sample size was determined, including (1) the estimated outcomes in each group; (2) the $\alpha$ (type I) error level; (3) the statistical power (or the $\beta$ (type II) error level); and (4) for continuous outcomes, the standard deviation of the measurements?                            |
| 3    | Sequence generation (8a)        | Method used to generate random allocation sequence                                                                                                                                      | Does the description make it clear if the “assigned intervention is determined by a chance process and cannot be predicted”?                                                                                                                                                                                                             |
| 4    | Allocation concealment (9)      | Mechanism used to implement random allocation sequence (such as sequentially numbered containers), describing any steps taken to conceal the sequence until interventions were assigned | Is it clear how the care provider enrolling participants was made ignorant of the next assignment in the sequence (different from blinding)? Possible methods can rely on centralised or “third-party” assignment (i.e., use of a central telephone randomisation system, automated assignment system, sealed containers).               |
| 5    | Blinding (11a)                  | If done, who was blinded after assignment to interventions (for example, participants, care providers, those assessing outcomes)                                                        | Is it clear if (1) healthcare providers, (2) patients, and (3) outcome assessors are blinded to the intervention? General terms such as “double-blind” without further specifications should be avoided.                                                                                                                                 |
| 6    | Outcomes and estimation (17a/b) | For the primary outcome, results for each group, and the estimated effect size and its precision (such as 95% confidence intervals)                                                     | Is the estimated effect size and its precision (such as standard deviation or 95% confidence intervals) for each treatment arm reported? When the primary outcome is binary, both the relative effect (risk ratio, relative risk) or odds ratio) and the absolute effect (risk difference) should be reported with confidence intervals. |
| 7    | Harms (19)                      | All-important harms or unintended effects in each group                                                                                                                                 | Is the number of affected persons in each group, the severity grade (if relevant) and the absolute risk (e.g. frequency of incidence) reported? Are the number of serious, life threatening events and deaths reported? If no adverse event occurred this should be clearly stated.                                                      |
| 8    | Registration (23)               | Registration number and name of trial registry                                                                                                                                          | Is the registry and the registration number reported? If the trial was not registered, it should be explained why.                                                                                                                                                                                                                       |
| 9    | Protocol (24)                   | Where trial protocol can be accessed                                                                                                                                                    | Is it stated where the trial protocol can be assessed (e.g. published, supplementary file, repository, directly from author, confidential and therefore not available)?                                                                                                                                                                  |
| 10   | Funding (25)                    | Sources of funding and other support (such as supply of drugs) and role of funders                                                                                                      | Are (1) the funding sources, and (2) the role of the funder(s) described?                                                                                                                                                                                                                                                                |

#### 4.4 Outcomes

##### Primary outcome:

The primary outcome of this study will be the difference of the mean proportion of adequately reported items of the 10 most important and poorly reported CONSORT items between the two intervention arms.

##### Secondary outcomes:

Secondary outcomes will include the following:

- Mean proportion of adequate reporting of the 10 most important and poorly reported CONSORT items, considering each sub-item (see also “Assessment of outcomes”) as a separate item.
- Mean proportion for each of the 10 most important and poorly reported CONSORT items separately (including also separate analysis of sub-items).
- Time from assigning an academic editor until the first decision (as communicated to the author after the first round of peer-review).
- Proportion of articles directly rejected after the first round of peer-review.
- Proportion of articles published.

##### Additional outcomes:

For journals where peer reviewer comments are subsequently published alongside the published article, we will examine the peer reviewer comments for any reference to CONSORT and trial reporting. We will contact those journals which do not make peer reviewer comments publicly available, to see if they still could be used for such an analyses under the condition that only anonymised data will be published.

##### Data collection methods:

The outcomes will be assessed independently by two (blinded or at least partially blinded; see “blinding”) outcome assessors with expertise in the design and reporting of clinical trials. Any disagreement will be resolved by consensus or if necessary by consulting a third assessor. To ensure consistency between reviewers, we will first pilot the data extraction form; any disparities in the interpretation will be discussed and the data extraction form will be modified accordingly.

Adequate reporting of items will be assessed from published full-text publications adhering to the CONSORT C-short checklist (21). The following included items have sub-items which will be extracted separately:

- Outcomes (item 6a): (i) Define primary outcome, (ii) how it was measured, (iii) at what time point, and (iv) the analysis metric (e.g. change from baseline, final value).
- Sample size (item 7a): (i) The estimated outcomes in each group, (ii) the  $\alpha$  (type I) error level, (iii) the statistical power (or the  $\beta$  (type II) error level), (iv) for continuous outcomes, the standard deviation of the measurements
- Blinding (item 11a): Is the blinding status clear for the following persons: (i) Healthcare provider, (ii) patients, and (iii) outcome assessors.
- Funding (item 25): (i) The funding source, and (ii) the role of funder in the design, conduct, analysis, and reporting.

All items will be judged as either “yes” meaning adequately reported, “no” meaning not adequately reported, or “NA” meaning that this sub-item is not applicable for this RCT. Items with different sub-items will only be judged as adequately reported if all relevant sub-items were adequately reported.

- Time from assigning an academic editor until the first decision: The day when the academic editor was assigned and the day of the first decision (e.g. major revision, minor revision, rejected) will be extracted to calculate the number of days until the first decision.
- Proportion of articles directly rejected after the first round of peer-review: Articles which were not invited for re-submission will be labelled and counted.
- Proportion of articles published: Articles which will be published will be counted and collected for data extraction.

The outcomes “time from assigning an academic editor until the first decision”, “proportion of articles directly rejected after the first round of peer-review”, and “proportion of articles published” will be extracted directly from editorial management software of the journal.

#### 4.5 Participant timeline

The overview of the study schedule, including enrolment, intervention and assessments is presented in Table 2.

**Table 2:** Study schedule

|                                                                                     | Enrolment                                         | Allocation and intervention                         | Intervention                                                   | Post-intervention                |                              |
|-------------------------------------------------------------------------------------|---------------------------------------------------|-----------------------------------------------------|----------------------------------------------------------------|----------------------------------|------------------------------|
| Time-point                                                                          | <i>Studies which are sent out for peer-review</i> | <i>After first peer-reviewer accepts invitation</i> | <i>Whenever an additional peer-reviewer accepts invitation</i> | <i>First decision by journal</i> | <i>Published manuscripts</i> |
| Eligibility screen                                                                  | X                                                 |                                                     |                                                                |                                  |                              |
| Allocation                                                                          |                                                   | X                                                   |                                                                |                                  |                              |
| Intervention:                                                                       |                                                   |                                                     |                                                                |                                  |                              |
| C-short + usual care                                                                |                                                   | X                                                   | X                                                              |                                  |                              |
| Usual care                                                                          |                                                   | X                                                   | X                                                              |                                  |                              |
| Assessment of trial characteristics:                                                |                                                   |                                                     |                                                                |                                  |                              |
| Funding source                                                                      |                                                   |                                                     |                                                                |                                  | X                            |
| Study centres (single centre or multicentre)                                        |                                                   |                                                     |                                                                |                                  | X                            |
| Sample size                                                                         |                                                   |                                                     |                                                                |                                  | X                            |
| Study design (e.g. parallel arm, crossover)                                         |                                                   |                                                     |                                                                |                                  | X                            |
| Hypothesis (e.g. superiority, non-inferiority)                                      |                                                   |                                                     |                                                                |                                  | X                            |
| Medical field                                                                       |                                                   |                                                     |                                                                |                                  | X                            |
| Intervention tested                                                                 |                                                   |                                                     |                                                                |                                  | X                            |
| Number of trial arms                                                                |                                                   |                                                     |                                                                |                                  | X                            |
| Number of peer-reviewers                                                            |                                                   |                                                     |                                                                |                                  | X                            |
| Journal which published the manuscript                                              |                                                   |                                                     |                                                                |                                  | X                            |
| Number of journals requesting CONSORT adherence (submission of checklist mandatory) |                                                   |                                                     |                                                                |                                  | X                            |
| Assessment of outcomes:                                                             |                                                   |                                                     |                                                                |                                  |                              |
| Time from assigning an academic editor until the first decision                     |                                                   |                                                     |                                                                | X                                |                              |
| Proportion of articles directly rejected after the first round of peer-review       |                                                   |                                                     |                                                                | X                                |                              |
| Proportion of articles published                                                    |                                                   |                                                     |                                                                |                                  | X                            |
| Adherence to CONSORT items and sub-items                                            |                                                   |                                                     |                                                                |                                  | X                            |

#### 4.6. Sample size

For the sample size calculation we hypothesise in a first scenario (Table 3) that the intervention C-Short will result in a 25% relative increase in adequate reporting compared to the control (meaning that 70% of items will be adequately reported in the intervention group and 56% in the control group). This is based on the rate of reporting of the 10 most important and poorly reported items was 0.56 (meaning that a mean of 56% of the 10 most important and poorly reported items were reported) in the control group of a previous study called WebCONSORT (38). The standard deviation (SD) in the same study was 0.23. However, we calculated our sample size to account for a slightly bigger variability in our data (SD = 0.25). To demonstrate a significant difference with a power of 90% and a type 1 error at 5% a total of 136 articles will be required in this scenario (68 per treatment arm; based on a two sided t-test).

The staff from one journal which will most likely be included (i.e. *PLoS One*) pointed out that 3 out of the 10 assessed items (i.e. item "Registration", "Protocol", and "Funding") should always be implemented given their template. Assuming that this journal will recruit a high proportion, and that also other journals might update their templates, we increased the sample size in a second scenario, in which all these 3 items would have an overall adherence of 90% in the control arm (Table 3). This would entail an overall baseline adherence with the 10 CONSORT-short items of 71%. Based on a two sided t-test, a sample size of 166 (83 per treatment arm) will have a power of 80% to find a 15% relative increase (71% adherence in control group; 82% adherence in intervention group; SD = 0.25; a type 1 error at 5%).

Since the final sample size will be based on the number of articles published, rather than on the number of manuscripts randomised, eligible RCTs will be included and randomised until the number of 83 published RCTs is reached in each arm (resulting in no less than 166 articles), to avoid loss of power due to potential imbalance between arms. Recruitment will be stopped as soon as both arms reach the sample size of 83. After recruitment stop we will wait three month so that manuscripts which are still in production can be published. Manuscripts which are published after the three month period will be excluded.



**Table 3:** Assumptions for sample size calculations in two different scenarios.

| Item           | CONSORT item                  | Scenario 1. Adequate reporting as published in WebCONSORT | Scenario 2. Adapted from Scenario 1 |
|----------------|-------------------------------|-----------------------------------------------------------|-------------------------------------|
| 1              | Outcomes (6a)                 | 77% (79 of 103)                                           | 77% (79 of 103)                     |
| 2              | Sample size (7a)              | 83% (85 of 103)                                           | 83% (85 of 103)                     |
| 3              | Sequence generation (8a)      | 76% (78 of 103)                                           | 76% (78 of 103)                     |
| 4              | Allocation concealment (9)    | 55% (57 of 103)                                           | 55% (57 of 103)                     |
| 5              | Blinding (11a)                | 35% (36 of 103)                                           | 35% (36 of 103)                     |
| 6              | Outcomes and estimation (17a) | 44% (45 of 103)                                           | 44% (45 of 103)                     |
| 7              | Harms (19)                    | 71% (73 of 103)                                           | 71% (73 of 103)                     |
| 8              | Registration (23)             | 69% (71 of 103)                                           | 90%                                 |
| 9              | Protocol (24)                 | 19% (20 of 103)                                           | 90%                                 |
| 10             | Funding (25)                  | 34% (35 of 103)                                           | 90%                                 |
| <b>Overall</b> |                               | <b>56%</b>                                                | <b>71%</b>                          |

Abbreviation: CONSORT= CONSolidated Standards for Reporting Trials

#### 4.7 Randomisation and blinding

Articles, which meet the eligibility criteria as a primary report of an RCT, for which the journal decides to send out for external peer review will be randomised into one of the two groups (allocation 1:1). The randomisation list will be created by the study-randomizer system (43) using random block sizes between 2 and 8 and stratification by journal. As soon as the first peer-reviewer accepts the invitation, the manuscript will be included and randomised to one of the two intervention arms. One of the investigators (BS) will log onto the study randomizer-system (43) entering the study identification number (ID; provided from the Journal), the study title, as well as the journal the study was submitted to. Subsequently, all additional peer-reviewers accepting the invitation to review the same manuscript will receive the same intervention (C-short plus usual practice or usual practice only) as the first peer-reviewer.

Authors will be blinded to the intervention allocation. Editors will not be actively informed about the randomisation (possible exception listed under "4.3 Interventions"). To avoid potential bias, peer reviewers and manuscript authors will not be informed of the study hypothesis, design and intervention.

Outcomes will be assessed in duplicate (see assessment of outcomes). At least one outcome assessors will be blinded. Due to restricted resources it might be possible that the investigator conducting the randomisation (BS) will be included in the data-extraction from published manuscripts.

#### 4.7 Data management and confidentiality



1  
2  
3 Outcomes from publications will be assessed and extracted in duplicate. Since this information  
4 is not confidential, we will use Google Forms for data extraction from published RCTs. Data  
5 entered will be validated for completeness.  
6  
7

8  
9 Data from the editorial manager software (e.g. Title of manuscript, first author, randomisation  
10 ID, Journal, date when manuscript was accepted by and academic editor, date when the final  
11 decision was made, final decision, number of peer-reviewers who peer reviewed the  
12 manuscript, the peer review) will be extracted, anonymised and entered in a password  
13 protected database which is saved on a server from the University of Oxford. Data will be  
14 managed and curated according to University of Oxford regulations, which includes regular  
15 back-up (on a daily basis) of the virtual drives where the data are stored.  
16  
17  
18  
19

20  
21 The raw data extracted from the included manuscripts can be made openly accessible in an  
22 anonymised way (i.e. giving the included RCT a number instead of identifying them).  
23 Derived/aggregated data, including anonymised information generated from the journals'  
24 editorial manager software, will be stored and made available to the research community when  
25 the project ends (see also "8. Publication policy and access to data"). Where appropriate, the  
26 researcher who has access to the editorial manager software (BS) and anyone else who will  
27 see the identifiable data will sign a confidentially agreement with the participating journals,  
28 confirming that they will not share identifiable data with any other party. Journals such as the  
29 BMJ series state in their Company Privacy Statement that research programmes for quality  
30 improvement might be in place. Furthermore, peer reviewers for all BMJ journals receive the  
31 following statement in their invitation letter "*We are constantly trying to find ways of improving  
32 the peer review system and have an ongoing programme of research. If you do not wish your  
33 review entered into a study please let us know by emailing [...] as soon as possible.*"  
34  
35  
36  
37  
38  
39  
40  
41  
42  
43

#### 44 4.8 Statistical methods

##### 45 4.8.1 Populations of analysis

46 The main population for analysis will be all manuscripts randomised and accepted for  
47 publication in the participating journals. Differently from RCTs conducted with patients, where  
48 drop outs need to be carefully considered (e.g. multiple imputation of missing data), we are  
49 only interested in the reporting adherence of RCTs that are published. All outcomes will be  
50 calculated based on the main population for analysis. The secondary outcome "Time to the  
51 first decision", will additionally be calculated considering all randomised manuscripts (including  
52 the ones which were not published).  
53  
54  
55  
56  
57  
58  
59  
60

#### 4.8.2 Data analysis

All quantitative variables will be described using means and standard deviations, or median and interquartile ranges in case severe departures from a normal distribution are identified. Data distribution will be inspected visually (i.e. by histograms) instead of performing formal statistical tests for normality. Categorical variables will be described using frequencies and percentages. For the primary and secondary outcomes, we will estimate the difference between means between the two groups and report them with respective 95% confidence intervals.

#### 4.8.3 Analysis of primary endpoint

The primary outcome will be the difference of the mean proportion of adequately reported items of the 10 most important and poorly reported CONSORT items. If the data on the primary outcome is normally distributed then the two groups (i.e. C-short plus usual practice vs. usual practice) will be compared using an unpaired Student's *t*-test to compare the unadjusted mean proportion of adequate reporting. If the data is not normally distributed, comparisons will be performed using a non-parametric equivalent test (i.e. Wilcoxon-Mann-Whitney test for testing whether the population medians of the two groups are the same).

For the analyses of the primary outcomes a *p*-value of 0.05 (5% significance level) will be used to indicate statistical significance and treatment effect (mean difference) reported with 95% confidence intervals (or median and respective interquartile ranges, in case of asymmetric distribution). Exact *p*-values will be presented up to three decimal places. We anticipate there will be no missing data in this study, neither at the individual C-short items, nor at the manuscript level. This is due to the study design, which will include only the randomised manuscripts that are accepted for publication.

#### 4.8.4 Analysis of secondary endpoints

To investigate the effect of the intervention on the secondary outcomes, mean differences with respective 95% confidence intervals will also be reported for these outcomes. If normality is not observed for any of the continuous secondary outcomes, the same strategy adopted for the primary outcome (use of a non-parametric equivalent to the Student's *t*-test) will be used.

A *p*-value of 0.05 will indicate statistical significance for the observed treatment effect on the secondary outcomes. Exact *p*-values will be presented up to three decimal places. Similarly to the primary outcome, we anticipate there will be no missing data for any of the secondary

1  
2  
3 outcomes, as we will have access to the Editorial Management system of the included  
4 journals, where all relevant information is automatically reported.  
5  
6

#### 7 4.8.5 Pre-specified subgroup analysis 8

9 No formal subgroup comparative analysis is planned for the primary or secondary outcomes.  
10 However, the effect of the intervention on the primary outcome within subgroups, will be  
11 presented using forest plots to visually examine whether it differs according to some variables,  
12 such as: (1) Journals that actively implement the CONSORT Statement (defined as requiring  
13 authors to submit a completed CONSORT checklist alongside their manuscript) vs. journals  
14 that are not actively implementing the CONSORT Statement; (2) sample size ( $n < 100$  vs.  $n \geq$   
15  $100$ ); and (3) impact factor ( $<5$ ,  $5.1-10$ ;  $>10$ ) as there is evidence that higher impact factor as  
16 well as higher sample size are associated with higher adherence to reporting guidelines (44).  
17 These analyses will be exploratory, with the aim of supporting new hypothesis generation,  
18 rather than conclusive.  
19  
20  
21  
22  
23  
24  
25  
26

## 27 **5 Legal and general logistics** 28

### 29 5.1. Organisation of study 30 31

#### 32 5.1.1 Coordinating centre 33

34 The coordinating centre's, will be the Centre for Statistics in Medicine at the University of  
35 Oxford under the responsibilities of Dr Sally Hopewell and Dr Benjamin Speich.  
36

37 The coordinating centre's will ensure the following missions:  
38

- 39 • Training of the staff
- 40 • Implementation of quality control
- 41 • Logical controls of data
- 42 • Follow-up on requests for correction/validation
- 43 • Statistical analysis
- 44 • Archiving of data
- 45
- 46
- 47
- 48
- 49

#### 50 5.1.2 Scientific committee 51

52 The scientific committee is composed of:

- 53 • Prof Isabelle Boutron: Centre D'Épidémiologie Clinique Hôtel-Dieu, Paris Descartes  
54 University, France
- 55 • Prof Matthias Briel, University of Basel, Switzerland
- 56 • Associate Prof Sally Hopewell: Centre for Statistics in Medicine, University of Oxford,  
57 UK
- 58
- 59
- 60

- Prof David Moher: Centre for Journalology, Clinical Epidemiology Program, Ottawa Hospital Research Institute, Canada
- Prof Philippe Ravaud: Centre d'Épidémiologie Clinique Hôtel-Dieu, Paris Descartes University, France
- Dr Benjamin Speich, Centre for Statistics in Medicine, University of Oxford, UK
- Dr. Michael M Schlusser, Centre for Statistics in Medicine, University of Oxford, UK
- Dr Sara Schroter, The BMJ, London, UK

The scientific committee is in charge of:

- Participating in the elaboration of the protocol
- Defining and validating the additional short explanation for each CONSORT item.
- Following the evolution of the committed study
- Publishing the results of this study

## 5.2. Regulatory aspects

Ethical approval for this study will be sought from the Central University Research Ethics Committee (CUREC) of the University of Oxford. Any amendments in the conduct of the study, collection of outcomes or analysis will be reported to the CUREC. The tested intervention has the goal to improve the quality of published journals (i.e. the adherence to CONSORT) and could also be implemented as usual practice without testing at the journal level. In agreement with another study, testing a similar intervention (45), we think that it is ethical to conduct this study without obtaining written consent. The main reason for this procedure are the following:

- Informing the authors and peer-reviewers would make it impossible to measure the effect of our intervention. In short, informing peer-reviewers and authors would create an artificial context which would not be comparable any more to the “real world context”. Authors and peer-reviewers would most likely be much more aware of CONSORT if they received information about the study. Furthermore, being aware to participate in a study could strongly influence the natural behaviour of peer-reviewers (e.g. putting more effort into reviewing a manuscript than under “real world conditions”) but also of authors.
- The intervention does not pose any risk of harms for authors and peer-reviewers.
- The intervention is not a medical intervention but rather tries to improve the research quality and journal processes.
- Several journal series (e.g. BMJ series) have Company Privacy Statements in place which clearly mention that research programmes might be in place for quality improvement.

- The intervention could be part of the routine at any Journal without previous assessment of its efficacy.
- No data which identifies participating manuscripts will be published.

## 6 Publication policy and access to data

The results from this study will be published in a peer-reviewed journal irrespective of the study results. Authorship to publications will be granted according to the rules of the International Committee of Medical Journal Editors (ICMJE). We plan to publish the full anonymised dataset as a supplementary file together with the main publication.

For peer review only

## References

1. Duley L, Antman K, Arena J, Avezum A, Blumenthal M, Bosch J, et al. Specific barriers to the conduct of randomized trials. *Clin Trials*. 2008;5(1):40-8.
2. Collins R, MacMahon S. Reliable assessment of the effects of treatment on mortality and major morbidity, I: clinical trials. *Lancet*. 2001;357(9253):373-80.
3. Chalmers I. Unbiased, relevant, and reliable assessments in health care: important progress during the past century, but plenty of scope for doing better. *BMJ*. 1998;317(7167):1167-8.
4. Collier R. Rapidly rising clinical trial costs worry researchers. *CMAJ*. 2009;180(3):277-8.
5. Eisenstein EL. Commentary on Sertkaya et al. and Larson et al. *Clin Trials*. 2016;13(2):137-9.
6. Sertkaya A, Wong HH, Jessup A, Beleche T. Key cost drivers of pharmaceutical clinical trials in the United States. *Clin Trials*. 2016;13(2):117-26.
7. Glasziou P, Altman DG, Bossuyt P, Boutron I, Clarke M, Julious S, et al. Reducing waste from incomplete or unusable reports of biomedical research. *Lancet*. 2014;383(9913):267-76.
8. Chan AW, Song F, Vickers A, Jefferson T, Dickersin K, Gotzsche PC, et al. Increasing value and reducing waste: addressing inaccessible research. *Lancet*. 2014;383(9913):257-66.
9. Chan AW, Tetzlaff JM, Altman DG, Dickersin K, Moher D. SPIRIT 2013: new guidance for content of clinical trial protocols. *Lancet*. 2013;381(9861):91-2.
10. Chan AW, Tetzlaff JM, Altman DG, Laupacis A, Gotzsche PC, Krleza-Jeric K, et al. SPIRIT 2013 statement: defining standard protocol items for clinical trials. *Ann Intern Med*. 2013;158(3):200-7.
11. Chan AW, Tetzlaff JM, Gotzsche PC, Altman DG, Mann H, Berlin JA, et al. SPIRIT 2013 explanation and elaboration: guidance for protocols of clinical trials. *BMJ*. 2013;346:e7586.
12. Lund H, Brunnhuber K, Juhl C, Robinson K, Leenaars M, Dorch BF, et al. Towards evidence based research. *BMJ*. 2016;355:i5440.
13. Kasenda B, von Elm E, You J, Blumle A, Tomonaga Y, Saccilotto R, et al. Prevalence, characteristics, and publication of discontinued randomized trials. *JAMA*. 2014;311(10):1045-51.
14. Alturki R, Schandelmaier S, Olu KK, von Niederhausern B, Agarwal A, Frei R, et al. Premature trial discontinuation often not accurately reflected in registries: comparison of registry records with publications. *J Clin Epidemiol*. 2017;81:56-63.
15. Altman DG, Simera I, Hoey J, Moher D, Schulz K. EQUATOR: reporting guidelines for health research. *Lancet*. 2008;371(9619):1149-50.
16. Simera I. EQUATOR Network collates resources for good research. *BMJ*. 2008;337:a2471.
17. Simera I, Altman DG. Writing a research article that is "fit for purpose": EQUATOR Network and reporting guidelines. *Evid Based Med*. 2009;14(5):132-4.
18. Simera I, Altman DG, Moher D, Schulz KF, Hoey J. Guidelines for reporting health research: the EQUATOR network's survey of guideline authors. *PLoS Med*. 2008;5(6):e139.
19. Simera I, Moher D, Hirst A, Hoey J, Schulz KF, Altman DG. Transparent and accurate reporting increases reliability, utility, and impact of your research: reporting guidelines and the EQUATOR Network. *BMC Med*. 2010;8:24.
20. Simera I, Moher D, Hoey J, Schulz KF, Altman DG. The EQUATOR Network and reporting guidelines: Helping to achieve high standards in reporting health research studies. *Maturitas*. 2009;63(1):4-6.
21. Moher D, Hopewell S, Schulz KF, Montori V, Gotzsche PC, Devereaux PJ, et al. CONSORT 2010 explanation and elaboration: updated guidelines for reporting parallel group randomised trials. *BMJ*. 2010;340:c869.



22. Schulz KF, Altman DG, Moher D, Group C. CONSORT 2010 statement: updated guidelines for reporting parallel group randomised trials. *BMJ*. 2010;340:c332.
23. Schulz KF, Altman DG, Moher D, Group C. CONSORT 2010 Statement: updated guidelines for reporting parallel group randomised trials. *BMC Med*. 2010;8:18.
24. CONSORT Transparent Reporting of Trials. Endorsers. Journals and Organizations. <http://www.consort-statement.org/about-consort/endorsers> [accessed: 27 February 2019]
25. Chan AW, Hrobjartsson A, Haahr MT, Gotzsche PC, Altman DG. Empirical evidence for selective reporting of outcomes in randomized trials: comparison of protocols to published articles. *JAMA*. 2004;291(20):2457-65.
26. Chalmers I, Glasziou P. Avoidable waste in the production and reporting of research evidence. *Lancet*. 2009;374(9683):86-9.
27. Ioannidis JP, Lau J. Completeness of safety reporting in randomized trials: an evaluation of 7 medical areas. *JAMA*. 2001;285(4):437-43.
28. Glasziou P, Meats E, Heneghan C, Shepperd S. What is missing from descriptions of treatment in trials and reviews? *BMJ*. 2008;336(7659):1472-4.
29. Boutron I, Dutton S, Ravaud P, Altman DG. Reporting and interpretation of randomized controlled trials with statistically nonsignificant results for primary outcomes. *JAMA*. 2010;303(20):2058-64.
30. Hopewell S, Dutton S, Yu LM, Chan AW, Altman DG. The quality of reports of randomised trials in 2000 and 2006: comparative study of articles indexed in PubMed. *BMJ*. 2010;340:c723.
31. Turner L, Shamseer L, Altman DG, Schulz KF, Moher D. Does use of the CONSORT Statement impact the completeness of reporting of randomised controlled trials published in medical journals? A Cochrane review. *Syst Rev*. 2012;1:60.
32. Oduyayo A, Emdin CA, Hsiao AJ, Shakir M, Copsey B, Dutton S, et al. Association between trial registration and positive study findings: cross sectional study (Epidemiological Study of Randomized Trials-ESORT). *BMJ*. 2017;356:j917.
33. Chan AW, Krleza-Jeric K, Schmid I, Altman DG. Outcome reporting bias in randomized trials funded by the Canadian Institutes of Health Research. *CMAJ*. 2004;171(7):735-40.
34. Glass KC. Toward a duty to report clinical trials accurately: the clinical alert and beyond. *J Law Med Ethics*. 1994;22(4):327-38.
35. Shamseer L, Hopewell S, Altman DG, Moher D, Schulz KF. Update on the endorsement of CONSORT by high impact factor journals: a survey of journal "Instructions to Authors" in 2014. *Trials*. 2016;17(1):301.
36. Hopewell S, Altman DG, Moher D, Schulz KF. Endorsement of the CONSORT Statement by high impact factor medical journals: a survey of journal editors and journal 'Instructions to Authors'. *Trials*. 2008;9:20.
37. Hopewell S, Ravaud P, Baron G, Boutron I. Effect of editors' implementation of CONSORT guidelines on the reporting of abstracts in high impact medical journals: interrupted time series analysis. *BMJ*. 2012;344:e4178.
38. Hopewell S, Boutron I, Altman DG, Barbour G, Moher D, Montori V, et al. Impact of a web-based tool (WebCONSORT) to improve the reporting of randomised trials: results of a randomised controlled trial. *BMC Med*. 2016;14(1):199.
39. Blanco D, Kirkham JJ, Altman DG, Moher D, Boutron I, Cobo E. Interventions to improve adherence to reporting guidelines in health research: a scoping review protocol. *BMJ Open*. 2017;7(11):e017551.
40. Hopewell S, Collins GS, Boutron I, Yu LM, Cook J, Shanyinde M, et al. Impact of peer review on reports of randomised trials published in open peer review journals: retrospective before and after study. *BMJ*. 2014;349:g4145.
41. Cobo E, Selva-O'Callaghan A, Ribera JM, Cardellach F, Dominguez R, Vilardell M. Statistical reviewers improve reporting in biomedical articles: a randomized trial. *PLoS One*. 2007;2(3):e332.

- 1  
2  
3 42. Barnes C, Boutron I, Giraudeau B, Porcher R, Altman DG, Ravaud P. Impact of an  
4 online writing aid tool for writing a randomized trial report: the COBWEB (Consort-based  
5 WEB tool) randomized controlled trial. BMC Med. 2015;13:221.  
6 43. Study Randomizer. <https://studyrandomizer.com/> [accessed: 23. January 2019].  
7 44. Jin Y, Sanger N, Shams I, Luo C, Shahid H, Li G, et al. Does the medical literature  
8 remain inadequately described despite having reporting guidelines for 21 years? - A  
9 systematic review of reviews: an update. Journal of multidisciplinary healthcare.  
10 2018;11:495-510.  
11 45. Hair K, Macleod MR, Sena ES. A randomised controlled trial of an Intervention to  
12 Improve Compliance with the ARRIVE guidelines (IICARus). bioRxiv. 2018.  
13  
14  
15  
16  
17  
18  
19  
20  
21  
22  
23  
24  
25  
26  
27  
28  
29  
30  
31  
32  
33  
34  
35  
36  
37  
38  
39  
40  
41  
42  
43  
44  
45  
46  
47  
48  
49  
50  
51  
52  
53  
54  
55  
56  
57  
58  
59  
60

For peer review only



## Appendix

Appendix 1: Example of the email which will be sent out in the intervention arm (C-Short).  
The exact wording might be slightly adapted according to the journal preferences.

Dear *\*Title, Name\**,

We thank you for accepting to peer-review a manuscript for *\*journal name\**. As we are trying to improve the reporting for randomised controlled trials according to the CONSORT guidelines, we would like to ask if you could check whether the following most important and poorly reported items are adequately implemented as indicated in the *table below/attached table*.

| Item | Section                         | CONSORT item                                                                                                                                                                            | Short explanation                                                                                                                                                                                                                                                                                                                       |
|------|---------------------------------|-----------------------------------------------------------------------------------------------------------------------------------------------------------------------------------------|-----------------------------------------------------------------------------------------------------------------------------------------------------------------------------------------------------------------------------------------------------------------------------------------------------------------------------------------|
| 1    | Outcomes (6a)                   | Completely defined pre-specified primary outcome measure, including how and when they were assessed                                                                                     | Is it clear (1) what the primary outcome is (usually the one used in the sample size calculation), (2) how it was measured (if relevant; e.g. which score used), (3) at what time point, and (4) what the analysis metric was (e.g. change from baseline, final value)?                                                                 |
| 2    | Sample size (7a)                | How sample size was determined                                                                                                                                                          | Is there a clear description of how the sample size was determined, including (1) the estimated outcomes in each group; (2) the $\alpha$ (type I) error level; (3) the statistical power (or the $\beta$ (type II) error level); and (4) for continuous outcomes, the standard deviation of the measurements?                           |
| 3    | Sequence generation (8a)        | Method used to generate random allocation sequence                                                                                                                                      | Does the description make it clear if the "assigned intervention is determined by a chance process and cannot be predicted"?                                                                                                                                                                                                            |
| 4    | Allocation concealment (9)      | Mechanism used to implement random allocation sequence (such as sequentially numbered containers), describing any steps taken to conceal the sequence until interventions were assigned | Is it clear how the care provider enrolling participants was made ignorant of the next assignment in the sequence (different from blinding)? Possible methods can rely on centralised or "third-party" assignment (i.e., use of a central telephone randomisation system, automated assignment system, sealed containers).              |
| 5    | Blinding (11a)                  | If done, who was blinded after assignment to interventions (for example, participants, care providers, those assessing outcomes)                                                        | Is it clear if (1) healthcare providers, (2) patients, and (3) outcome assessors are blinded to the intervention? General terms such as "double-blind" without further specifications should be avoided.                                                                                                                                |
| 6    | Outcomes and estimation (17a/b) | For the primary outcome, results for each group, and the estimated effect size and its precision (such as 95% confidence intervals)                                                     | Is the estimated effect size and its precision (such as standard deviation or 95% confidence intervals) for each treatment arm reported? When the primary outcome is binary, both the relative effect (risk ratio, relative risk) or odds ratio and the absolute effect (risk difference) should be reported with confidence intervals. |
| 7    | Harms (19)                      | All-important harms or unintended effects in each group                                                                                                                                 | Is the number of affected persons in each group, the severity grade (if relevant) and the absolute risk (e.g. frequency of incidence) reported? Are the number of serious, life threatening events and deaths reported? If no adverse event occurred this should be clearly stated.                                                     |
| 8    | Registration (23)               | Registration number and name of trial registry                                                                                                                                          | Is the registry and the registration number reported? If the trial was not registered, it should be explained why.                                                                                                                                                                                                                      |
| 9    | Protocol (24)                   | Where trial protocol can be accessed                                                                                                                                                    | Is it stated where the trial protocol can be assessed (e.g. published, supplementary file, repository, directly from author, confidential and therefore not available)?                                                                                                                                                                 |
| 10   | Funding (25)                    | Sources of funding and other support (such as supply of drugs) and role of funders                                                                                                      | Are (1) the funding sources, and (2) the role of funder(s) described?                                                                                                                                                                                                                                                                   |

Your efforts are highly appreciated.

Kind regards,

*\*journal name\**-Team

**Appendix 3: WHO Trial Registration Data Set (Version 1.3.1)**

Statement was filled out on the 01. October 2019.

**1. Primary Registry and Trial Identifying Number**

This trial was denied registration on ClinicalTrials.gov as the study is not a clinical study that assesses a health outcome in human subjects. Instead we registered the trial on the Open Science Framework (<https://osf.io/c4hn8>).

**2. Date of Registration in Primary Registry**

21. June 2019

**3. Secondary Identifying Numbers**

Not applicable

**4. Source(s) of Monetary or Material Support**

No specific funding was acquired for this study. Benjamin Speich is supported by an Advanced Postdoc.Mobility grant from the Swiss National Science Foundation (P300PB\_177933). David Moher is supported by a University Research Chair, Ottawa. Michael M Schlüssel is funded by Cancer Research UK. The funders had no role in designing the study and will also have no role in conducting the study, or analysing and reporting study results.

**5. Primary Sponsor**

|                                              |                                                                                                                                                                                                                                                                                                                           |
|----------------------------------------------|---------------------------------------------------------------------------------------------------------------------------------------------------------------------------------------------------------------------------------------------------------------------------------------------------------------------------|
| Sponsor:                                     | University of Oxford                                                                                                                                                                                                                                                                                                      |
| Principal Investigator/Sponsor Investigator: | Benjamin Speich, PhD<br>Postdoctoral Researcher<br>Centre for Statistics in Medicine (CSM)<br>Nuffield Department of Orthopaedics, Rheumatology and<br>Musculoskeletal Sciences (NDORMS)<br>University of Oxford<br>Windmill Road<br>Oxford OX3 7LD<br>Tel: +44 1865 737904<br><br>Email: benjamin.speich@ndorms.ox.ac.uk |

**6. Secondary Sponsor(s)**

Not applicable

1  
2  
3 **7. Contact for Public Queries**

4 Dr. Benjamin Speich

5  
6 Tel: +44 1865 737904

7  
8 Email: benjamin.speich@ndorms.ox.ac.uk

9  
10  
11 **8. Contact for Scientific Queries**

12  
13 Sponsor: University of Oxford  
14 Principal Investigator/Sponsor Benjamin Speich, PhD  
15 Investigator: Postdoctoral Researcher  
16 Centre for Statistics in Medicine (CSM)  
17 Nuffield Department of Orthopaedics, Rheumatology and  
18 Musculoskeletal Sciences (NDORMS)  
19 University of Oxford  
20 Windmill Road  
21 Oxford OX3 7LD  
22 Tel: +44 1865 737904  
23  
24 Email: benjamin.speich@ndorms.ox.ac.uk  
25  
26  
27  
28  
29

30 **9. Public Title**

31  
32 Impact of checklists to improve the reporting of randomised controlled trials published in  
33 biomedical journals

34  
35 **10. Scientific Title**

36  
37 Impact of a short version of the CONSORT checklist for peer reviewers to improve the  
38 reporting of randomised controlled trials published in biomedical journals: a randomised  
39 controlled trial

40 Running title: CONSORT for Peer Review (CONSORT-PR)

41  
42  
43 Study identifier: CONSORT-PR

44  
45  
46  
47 **11. Countries of Recruitment**

48 Multinational (Centres are Biomedical journals)

49  
50 **12. Health Condition(s) or Problem(s) Studied**

51 Reporting in published randomised controlled trials

52  
53  
54  
55  
56 **13. Intervention(s)**

57 Control group: Usual practice  
58  
59  
60

1  
2  
3 After accepting to review a manuscript, peer reviewers will receive the automated, journal  
4 specific standard email with general information as per each journal's usual practice (e.g.  
5 where to access the manuscript, date the peer review report is due).  
6  
7  
8  
9

#### 10 Intervention group: C-short plus usual practice

11 After accepting to review a manuscript, peer reviewers will receive the automated, journal  
12 specific standard email with general information (identical to control group). In addition, peer  
13 reviewers will receive an additional email from the editorial office that includes a short  
14 version of the CONSORT checklist (C-short) together with a brief explanation of the items  
15 either as a table within the email or as an attachment. Peer reviewers will be asked to check  
16 whether the items in the C-short checklist are addressed in the manuscript and to request  
17 authors to include these items if they are not adequately reported.  
18  
19  
20  
21  
22

#### 23 **14. Key Inclusion and Exclusion Criteria**

24  
25 The population will be defined on two levels: included journals and included manuscripts.  
26

##### 27 Inclusion criteria for journals:

28  
29 Included journals must: i) endorse the CONSORT Statement by mentioning it in the journals'  
30 Instruction to Authors; ii) have published primary results of at least five RCTs in 2017  
31 (identified using a PubMed search).  
32

##### 33 Inclusion criteria for manuscripts

34  
35 • All new manuscript submissions reporting the primary results of RCTs, which the  
36 journal editor has decided to send out for external peer review. Since the 10 chosen  
37 CONSORT checklist items (C-short) are applicable to different study designs, we will include  
38 all manuscripts reporting the primary results of RCTs regardless of study design (e.g. parallel  
39 group trial, cluster trial, superiority trial, non-inferiority/equivalence trials).  
40  
41

##### 42 Exclusion criteria for manuscripts

- 43  
44 • Manuscripts clearly presenting secondary trial results, additional time points, economic  
45 analyses, or any other analyses.  
46  
47 • Manuscripts which are clearly labelled as a pilot or feasibility study or animal studies.  
48  
49 • Manuscripts not sent for peer review.  
50  
51  
52  
53  
54

#### 55 **15. Study Type**

56  
57 This study is a multicentre RCT with submitted manuscripts as the unit of randomisation  
58 (allocation ratio 1:1).  
59  
60

1  
2  
3 **16. Date of First Enrollment**  
4

5 22. July 2019  
6  
7  
8

9 **17. Sample Size**

10 166 Since the final sample size will be based on the number of articles published, rather than  
11 on the number of manuscripts randomised, eligible manuscripts will be randomised until 83  
12 articles are published in each arm (resulting in no less than 166 articles), to avoid loss of power  
13 due to potential imbalance between arms.  
14  
15

16 **18. Recruitment Status**  
17

18 Recruiting  
19

20 **19. Primary Outcome(s)**

- 21
- 22 • The primary outcome of this study will be the difference in the mean proportion of  
23 adequately reported C-short items in published articles between the two groups.  
24

25 **20. Key Secondary Outcomes**  
26

- 27 • Mean proportion of adequately reported C-short items in published articles  
28 considering each item separately.  
29
- 30 • Difference in mean proportion of adequately reported C-short items in published  
31 articles considering each sub-item (see "Assessment of outcomes") as a separate item.  
32
- 33 • Time from assigning an editor to the first decision (as communicated to the author  
34 after the first round of peer-review).  
35
- 36 • Proportion of manuscripts rejected after the first round of peer review.  
37
- 38 • Proportion of manuscripts that will be published in the journal under study.  
39  
40  
41  
42  
43

44 **21. Ethics Review**

45 Ethical approval has been obtained from the Medical Sciences Interdivisional Research  
46 Ethics Committee of the University of Oxford (R62779/RE001).  
47  
48

49 **22. Completion date**

50 We expect that recruitment will be finished in summer 2021.  
51

52 **23. Summary Results**

53 Not applicable  
54

55 **24. IPD sharing statement**  
56

57 We plan to make the anonymised dataset, including the data from the published articles,  
58 available as a supplementary file of the main publication.  
59  
60

1 **Impact of a short form of the CONSORT checklist for peer reviewers to improve the reporting of randomised controlled trials published**  
 2 **in biomedical journals: study protocol for a randomised controlled trial**  
 3  
 4  
 5  
 6

7 Benjamin Speich<sup>1,2,\*</sup>, Sara Schroter<sup>3</sup>, Matthias Briel<sup>2,4</sup>, David Moher<sup>5</sup>, Michael M Schlusser<sup>1</sup>, Philippe Ravaud<sup>6,7</sup>, Isabelle Boutron<sup>6,7</sup>, Sally Hopewell<sup>1</sup>  
 8  
 9  
 10  
 11  
 12  
 13  
 14  
 15  
 16  
 17

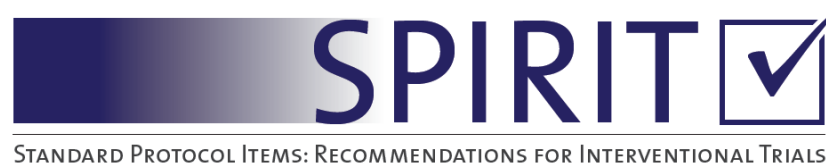

18  
 19  
 20 SPIRIT 2013 Checklist: Recommended  
 21 and related documents\*  
 22

items to address in a clinical trial protocol

| Section/item                      | Item No | Description                                                                                                  | Addressed on page number |
|-----------------------------------|---------|--------------------------------------------------------------------------------------------------------------|--------------------------|
| <b>Administrative information</b> |         |                                                                                                              |                          |
| Title                             | 1       | Descriptive title identifying the study design, population, interventions, and, if applicable, trial acronym | 1_____                   |
| Trial registration                | 2a      | Trial identifier and registry name. If not yet registered, name of intended registry                         | 3_____                   |
|                                   | 2b      | All items from the World Health Organization Trial Registration Data Set                                     | Appendix 3               |
| Protocol version                  | 3       | Date and version identifier                                                                                  | Appendix 1               |
| Funding                           | 4       | Sources and types of financial, material, and other support                                                  | 2_____                   |
| Roles and responsibilities        | 5a      | Names, affiliations, and roles of protocol contributors                                                      | 1 and 19-20__            |
|                                   | 5b      | Name and contact information for the trial sponsor                                                           | 1 and Appendix 1_        |

1  
2  
3  
4  
5  
6  
7  
8  
9  
10  
11  
12  
13  
14  
15  
16  
17  
18  
19  
20  
21  
22  
23  
24  
25  
26  
27  
28  
29  
30  
31  
32  
33  
34  
35  
36  
37  
38  
39  
40  
41  
42  
43  
44  
45  
46

|                                                           |     |                                                                                                                                                                                                                                                                                          |                                       |
|-----------------------------------------------------------|-----|------------------------------------------------------------------------------------------------------------------------------------------------------------------------------------------------------------------------------------------------------------------------------------------|---------------------------------------|
|                                                           | 5c  | Role of study sponsor and funders, if any, in study design; collection, management, analysis, and interpretation of data; writing of the report; and the decision to submit the report for publication, including whether they will have ultimate authority over any of these activities | 2_____                                |
|                                                           | 5d  | Composition, roles, and responsibilities of the coordinating centre, steering committee, endpoint adjudication committee, data management team, and other individuals or groups overseeing the trial, if applicable (see Item 21a for data monitoring committee)                         | 20_____                               |
| <b>Introduction</b>                                       |     |                                                                                                                                                                                                                                                                                          |                                       |
| Background and rationale                                  | 6a  | Description of research question and justification for undertaking the trial, including summary of relevant studies (published and unpublished) examining benefits and harms for each intervention                                                                                       | 5-6_____                              |
|                                                           | 6b  | Explanation for choice of comparators                                                                                                                                                                                                                                                    | 5-6 (comparator, usual practice)_____ |
| Objectives                                                | 7   | Specific objectives or hypotheses                                                                                                                                                                                                                                                        | 6                                     |
| Trial design                                              | 8   | Description of trial design including type of trial (eg, parallel group, crossover, factorial, single group), allocation ratio, and framework (eg, superiority, equivalence, noninferiority, exploratory)                                                                                | 7_____                                |
| <b>Methods: Participants, interventions, and outcomes</b> |     |                                                                                                                                                                                                                                                                                          |                                       |
| Study setting                                             | 9   | Description of study settings (eg, community clinic, academic hospital) and list of countries where data will be collected. Reference to where list of study sites can be obtained                                                                                                       | 7-9_____                              |
| Eligibility criteria                                      | 10  | Inclusion and exclusion criteria for participants. If applicable, eligibility criteria for study centres and individuals who will perform the interventions (eg, surgeons, psychotherapists)                                                                                             | 7-9_                                  |
| Interventions                                             | 11a | Interventions for each group with sufficient detail to allow replication, including how and when they will be administered                                                                                                                                                               | 9-10, Table 1, Appendix_____          |

|    |                      |     |                                                                                                                                                                                                                                                                                                                                                                                |                                 |
|----|----------------------|-----|--------------------------------------------------------------------------------------------------------------------------------------------------------------------------------------------------------------------------------------------------------------------------------------------------------------------------------------------------------------------------------|---------------------------------|
| 1  |                      | 11b | Criteria for discontinuing or modifying allocated interventions for a given trial participant (eg, drug dose change in response to harms, participant request, or improving/worsening disease)                                                                                                                                                                                 | NA (one time intervention)      |
| 2  |                      |     |                                                                                                                                                                                                                                                                                                                                                                                |                                 |
| 3  |                      |     |                                                                                                                                                                                                                                                                                                                                                                                |                                 |
| 4  |                      | 11c | Strategies to improve adherence to intervention protocols, and any procedures for monitoring adherence (eg, drug tablet return, laboratory tests)                                                                                                                                                                                                                              | NA (one time intervention)      |
| 5  |                      |     |                                                                                                                                                                                                                                                                                                                                                                                |                                 |
| 6  |                      |     |                                                                                                                                                                                                                                                                                                                                                                                |                                 |
| 7  |                      | 11d | Relevant concomitant care and interventions that are permitted or prohibited during the trial                                                                                                                                                                                                                                                                                  | NA_____                         |
| 8  |                      |     |                                                                                                                                                                                                                                                                                                                                                                                |                                 |
| 9  | Outcomes             | 12  | Primary, secondary, and other outcomes, including the specific measurement variable (eg, systolic blood pressure), analysis metric (eg, change from baseline, final value, time to event), method of aggregation (eg, median, proportion), and time point for each outcome. Explanation of the clinical relevance of chosen efficacy and harm outcomes is strongly recommended | 10-12_____                      |
| 10 |                      |     |                                                                                                                                                                                                                                                                                                                                                                                |                                 |
| 11 |                      |     |                                                                                                                                                                                                                                                                                                                                                                                |                                 |
| 12 |                      |     |                                                                                                                                                                                                                                                                                                                                                                                |                                 |
| 13 |                      |     |                                                                                                                                                                                                                                                                                                                                                                                |                                 |
| 14 |                      |     |                                                                                                                                                                                                                                                                                                                                                                                |                                 |
| 15 | Participant timeline | 13  | Time schedule of enrolment, interventions (including any run-ins and washouts), assessments, and visits for participants. A schematic diagram is highly recommended (see Figure)                                                                                                                                                                                               | Figure 1 and Table Table 2_____ |
| 16 |                      |     |                                                                                                                                                                                                                                                                                                                                                                                |                                 |
| 17 |                      |     |                                                                                                                                                                                                                                                                                                                                                                                |                                 |
| 18 | Sample size          | 14  | Estimated number of participants needed to achieve study objectives and how it was determined, including clinical and statistical assumptions supporting any sample size calculations                                                                                                                                                                                          | 13-14_____                      |
| 19 |                      |     |                                                                                                                                                                                                                                                                                                                                                                                |                                 |
| 20 |                      |     |                                                                                                                                                                                                                                                                                                                                                                                |                                 |
| 21 | Recruitment          | 15  | Strategies for achieving adequate participant enrolment to reach target sample size                                                                                                                                                                                                                                                                                            | 7-8, 13-14____                  |
| 22 |                      |     |                                                                                                                                                                                                                                                                                                                                                                                |                                 |
| 23 |                      |     |                                                                                                                                                                                                                                                                                                                                                                                |                                 |

## Methods: Assignment of interventions (for controlled trials)

### Allocation:

|    |                                  |     |                                                                                                                                                                                                                                                                                                                                                          |         |
|----|----------------------------------|-----|----------------------------------------------------------------------------------------------------------------------------------------------------------------------------------------------------------------------------------------------------------------------------------------------------------------------------------------------------------|---------|
| 27 |                                  |     |                                                                                                                                                                                                                                                                                                                                                          |         |
| 28 | Sequence generation              | 16a | Method of generating the allocation sequence (eg, computer-generated random numbers), and list of any factors for stratification. To reduce predictability of a random sequence, details of any planned restriction (eg, blocking) should be provided in a separate document that is unavailable to those who enrol participants or assign interventions | 14_____ |
| 29 |                                  |     |                                                                                                                                                                                                                                                                                                                                                          |         |
| 30 |                                  |     |                                                                                                                                                                                                                                                                                                                                                          |         |
| 31 |                                  |     |                                                                                                                                                                                                                                                                                                                                                          |         |
| 32 |                                  |     |                                                                                                                                                                                                                                                                                                                                                          |         |
| 33 | Allocation concealment mechanism | 16b | Mechanism of implementing the allocation sequence (eg, central telephone; sequentially numbered, opaque, sealed envelopes), describing any steps to conceal the sequence until interventions are assigned                                                                                                                                                | 14_____ |
| 34 |                                  |     |                                                                                                                                                                                                                                                                                                                                                          |         |
| 35 |                                  |     |                                                                                                                                                                                                                                                                                                                                                          |         |
| 36 |                                  |     |                                                                                                                                                                                                                                                                                                                                                          |         |
| 37 |                                  |     |                                                                                                                                                                                                                                                                                                                                                          |         |
| 38 | Implementation                   | 16c | Who will generate the allocation sequence, who will enrol participants, and who will assign participants to interventions                                                                                                                                                                                                                                | 14_____ |
| 39 |                                  |     |                                                                                                                                                                                                                                                                                                                                                          |         |
| 40 |                                  |     |                                                                                                                                                                                                                                                                                                                                                          |         |
| 41 |                                  |     |                                                                                                                                                                                                                                                                                                                                                          |         |
| 42 |                                  |     |                                                                                                                                                                                                                                                                                                                                                          |         |



|   |                    |     |                                                                                                                                                      |         |
|---|--------------------|-----|------------------------------------------------------------------------------------------------------------------------------------------------------|---------|
| 1 | Blinding (masking) | 17a | Who will be blinded after assignment to interventions (eg, trial participants, care providers, outcome assessors, data analysts), and how            | 14_____ |
| 2 |                    |     |                                                                                                                                                      |         |
| 3 |                    |     |                                                                                                                                                      |         |
| 4 |                    | 17b | If blinded, circumstances under which unblinding is permissible, and procedure for revealing a participant's allocated intervention during the trial | NA_____ |
| 5 |                    |     |                                                                                                                                                      |         |
| 6 |                    |     |                                                                                                                                                      |         |
| 7 |                    |     |                                                                                                                                                      |         |

8 **Methods: Data collection, management, and analysis**

|    |                         |     |                                                                                                                                                                                                                                                                                                                                                                                                              |                                  |
|----|-------------------------|-----|--------------------------------------------------------------------------------------------------------------------------------------------------------------------------------------------------------------------------------------------------------------------------------------------------------------------------------------------------------------------------------------------------------------|----------------------------------|
| 9  |                         |     |                                                                                                                                                                                                                                                                                                                                                                                                              |                                  |
| 10 | Data collection methods | 18a | Plans for assessment and collection of outcome, baseline, and other trial data, including any related processes to promote data quality (eg, duplicate measurements, training of assessors) and a description of study instruments (eg, questionnaires, laboratory tests) along with their reliability and validity, if known. Reference to where data collection forms can be found, if not in the protocol | 11-12__                          |
| 11 |                         |     |                                                                                                                                                                                                                                                                                                                                                                                                              |                                  |
| 12 |                         |     |                                                                                                                                                                                                                                                                                                                                                                                                              |                                  |
| 13 |                         |     |                                                                                                                                                                                                                                                                                                                                                                                                              |                                  |
| 14 |                         |     |                                                                                                                                                                                                                                                                                                                                                                                                              |                                  |
| 15 |                         | 18b | Plans to promote participant retention and complete follow-up, including list of any outcome data to be collected for participants who discontinue or deviate from intervention protocols                                                                                                                                                                                                                    | 14 (no missing data expected)___ |
| 16 |                         |     |                                                                                                                                                                                                                                                                                                                                                                                                              |                                  |
| 17 |                         |     |                                                                                                                                                                                                                                                                                                                                                                                                              |                                  |
| 18 | Data management         | 19  | Plans for data entry, coding, security, and storage, including any related processes to promote data quality (eg, double data entry; range checks for data values). Reference to where details of data management procedures can be found, if not in the protocol                                                                                                                                            | 15-16__                          |
| 19 |                         |     |                                                                                                                                                                                                                                                                                                                                                                                                              |                                  |
| 20 |                         |     |                                                                                                                                                                                                                                                                                                                                                                                                              |                                  |
| 21 |                         |     |                                                                                                                                                                                                                                                                                                                                                                                                              |                                  |
| 22 |                         |     |                                                                                                                                                                                                                                                                                                                                                                                                              |                                  |
| 23 | Statistical methods     | 20a | Statistical methods for analysing primary and secondary outcomes. Reference to where other details of the statistical analysis plan can be found, if not in the protocol                                                                                                                                                                                                                                     | 13-15_____                       |
| 24 |                         |     |                                                                                                                                                                                                                                                                                                                                                                                                              |                                  |
| 25 |                         |     |                                                                                                                                                                                                                                                                                                                                                                                                              |                                  |
| 26 |                         | 20b | Methods for any additional analyses (eg, subgroup and adjusted analyses)                                                                                                                                                                                                                                                                                                                                     | 16_____                          |
| 27 |                         |     |                                                                                                                                                                                                                                                                                                                                                                                                              |                                  |
| 28 |                         | 20c | Definition of analysis population relating to protocol non-adherence (eg, as randomised analysis), and any statistical methods to handle missing data (eg, multiple imputation)                                                                                                                                                                                                                              | 15 (no missing data expected)___ |
| 29 |                         |     |                                                                                                                                                                                                                                                                                                                                                                                                              |                                  |
| 30 |                         |     |                                                                                                                                                                                                                                                                                                                                                                                                              |                                  |
| 31 |                         |     |                                                                                                                                                                                                                                                                                                                                                                                                              |                                  |

32 **Methods: Monitoring**

|    |                 |     |                                                                                                                                                                                                                                                                                                                                       |         |
|----|-----------------|-----|---------------------------------------------------------------------------------------------------------------------------------------------------------------------------------------------------------------------------------------------------------------------------------------------------------------------------------------|---------|
| 33 |                 |     |                                                                                                                                                                                                                                                                                                                                       |         |
| 34 | Data monitoring | 21a | Composition of data monitoring committee (DMC); summary of its role and reporting structure; statement of whether it is independent from the sponsor and competing interests; and reference to where further details about its charter can be found, if not in the protocol. Alternatively, an explanation of why a DMC is not needed | 17_____ |
| 35 |                 |     |                                                                                                                                                                                                                                                                                                                                       |         |
| 36 |                 |     |                                                                                                                                                                                                                                                                                                                                       |         |
| 37 |                 |     |                                                                                                                                                                                                                                                                                                                                       |         |
| 38 |                 |     |                                                                                                                                                                                                                                                                                                                                       |         |
| 39 |                 |     |                                                                                                                                                                                                                                                                                                                                       |         |
| 40 |                 | 21b | Description of any interim analyses and stopping guidelines, including who will have access to these interim results and make the final decision to terminate the trial                                                                                                                                                               | 13_____ |
| 41 |                 |     |                                                                                                                                                                                                                                                                                                                                       |         |
| 42 |                 |     |                                                                                                                                                                                                                                                                                                                                       |         |

|    |                                 |     |                                                                                                                                                                                                                                                                                     |                 |
|----|---------------------------------|-----|-------------------------------------------------------------------------------------------------------------------------------------------------------------------------------------------------------------------------------------------------------------------------------------|-----------------|
| 1  | Harms                           | 22  | Plans for collecting, assessing, reporting, and managing solicited and spontaneously reported adverse events and other unintended effects of trial interventions or trial conduct                                                                                                   | NA__            |
| 2  |                                 |     |                                                                                                                                                                                                                                                                                     |                 |
| 3  |                                 |     |                                                                                                                                                                                                                                                                                     |                 |
| 4  | Auditing                        | 23  | Frequency and procedures for auditing trial conduct, if any, and whether the process will be independent from investigators and the sponsor                                                                                                                                         | 17_____         |
| 5  |                                 |     |                                                                                                                                                                                                                                                                                     |                 |
| 6  |                                 |     |                                                                                                                                                                                                                                                                                     |                 |
| 7  |                                 |     |                                                                                                                                                                                                                                                                                     |                 |
| 8  | <b>Ethics and dissemination</b> |     |                                                                                                                                                                                                                                                                                     |                 |
| 9  |                                 |     |                                                                                                                                                                                                                                                                                     |                 |
| 10 | Research ethics approval        | 24  | Plans for seeking research ethics committee/institutional review board (REC/IRB) approval                                                                                                                                                                                           | 20_____         |
| 11 |                                 |     |                                                                                                                                                                                                                                                                                     |                 |
| 12 |                                 |     |                                                                                                                                                                                                                                                                                     |                 |
| 13 | Protocol amendments             | 25  | Plans for communicating important protocol modifications (eg, changes to eligibility criteria, outcomes, analyses) to relevant parties (eg, investigators, REC/IRBs, trial participants, trial registries, journals, regulators)                                                    | 20_             |
| 14 |                                 |     |                                                                                                                                                                                                                                                                                     |                 |
| 15 |                                 |     |                                                                                                                                                                                                                                                                                     |                 |
| 16 |                                 |     |                                                                                                                                                                                                                                                                                     |                 |
| 17 | Consent or assent               | 26a | Who will obtain informed consent or assent from potential trial participants or authorised surrogates, and how (see Item 32)                                                                                                                                                        | Appendix 2_____ |
| 18 |                                 |     |                                                                                                                                                                                                                                                                                     |                 |
| 19 |                                 |     |                                                                                                                                                                                                                                                                                     |                 |
| 20 |                                 | 26b | Additional consent provisions for collection and use of participant data and biological specimens in ancillary studies, if applicable                                                                                                                                               | NA_____         |
| 21 |                                 |     |                                                                                                                                                                                                                                                                                     |                 |
| 22 |                                 |     |                                                                                                                                                                                                                                                                                     |                 |
| 23 |                                 |     |                                                                                                                                                                                                                                                                                     |                 |
| 24 | Confidentiality                 | 27  | How personal information about potential and enrolled participants will be collected, shared, and maintained in order to protect confidentiality before, during, and after the trial                                                                                                | 17_             |
| 25 |                                 |     |                                                                                                                                                                                                                                                                                     |                 |
| 26 |                                 |     |                                                                                                                                                                                                                                                                                     |                 |
| 27 | Declaration of interests        | 28  | Financial and other competing interests for principal investigators for the overall trial and each study site                                                                                                                                                                       | 20_____         |
| 28 |                                 |     |                                                                                                                                                                                                                                                                                     |                 |
| 29 |                                 |     |                                                                                                                                                                                                                                                                                     |                 |
| 30 | Access to data                  | 29  | Statement of who will have access to the final trial dataset, and disclosure of contractual agreements that limit such access for investigators                                                                                                                                     | 21__            |
| 31 |                                 |     |                                                                                                                                                                                                                                                                                     |                 |
| 32 |                                 |     |                                                                                                                                                                                                                                                                                     |                 |
| 33 | Ancillary and post-trial care   | 30  | Provisions, if any, for ancillary and post-trial care, and for compensation to those who suffer harm from trial participation                                                                                                                                                       | NA__            |
| 34 |                                 |     |                                                                                                                                                                                                                                                                                     |                 |
| 35 |                                 |     |                                                                                                                                                                                                                                                                                     |                 |
| 36 | Dissemination policy            | 31a | Plans for investigators and sponsor to communicate trial results to participants, healthcare professionals, the public, and other relevant groups (eg, via publication, reporting in results databases, or other data sharing arrangements), including any publication restrictions | 21_____         |
| 37 |                                 |     |                                                                                                                                                                                                                                                                                     |                 |
| 38 |                                 |     |                                                                                                                                                                                                                                                                                     |                 |
| 39 |                                 |     |                                                                                                                                                                                                                                                                                     |                 |
| 40 |                                 |     |                                                                                                                                                                                                                                                                                     |                 |
| 41 |                                 | 31b | Authorship eligibility guidelines and any intended use of professional writers                                                                                                                                                                                                      | 21_____         |
| 42 |                                 |     |                                                                                                                                                                                                                                                                                     |                 |
| 43 |                                 |     |                                                                                                                                                                                                                                                                                     |                 |
| 44 |                                 |     |                                                                                                                                                                                                                                                                                     |                 |
| 45 |                                 |     |                                                                                                                                                                                                                                                                                     |                 |
| 46 |                                 |     |                                                                                                                                                                                                                                                                                     |                 |

|   |     |                                                                                                                 |                                                                     |
|---|-----|-----------------------------------------------------------------------------------------------------------------|---------------------------------------------------------------------|
| 1 | 31c | Plans, if any, for granting public access to the full protocol, participant-level dataset, and statistical code | Intend to publish in<br>BMJ open<br>(protocol), dataset:<br>page 21 |
| 2 |     |                                                                                                                 |                                                                     |
| 3 |     |                                                                                                                 |                                                                     |
| 4 |     |                                                                                                                 |                                                                     |
| 5 |     |                                                                                                                 |                                                                     |
| 6 |     |                                                                                                                 |                                                                     |

**Appendices**

|    |    |                                                                                                           |                             |
|----|----|-----------------------------------------------------------------------------------------------------------|-----------------------------|
| 9  | 32 | Model consent form and other related documentation given to participants and authorised surrogates        | Appendix 2 (no<br>consent)_ |
| 10 |    |                                                                                                           |                             |
| 11 |    |                                                                                                           |                             |
| 12 | 33 | Plans for collection, laboratory evaluation, and storage of biological specimens for genetic or molecular | NA_____                     |
| 13 |    | analysis in the current trial and for future use in ancillary studies, if applicable                      |                             |
| 14 |    |                                                                                                           |                             |

---

\*It is strongly recommended that this checklist be read in conjunction with the SPIRIT 2013 Explanation & Elaboration for important clarification on the items. Amendments to the protocol should be tracked and dated. The SPIRIT checklist is copyrighted by the SPIRIT Group under the Creative Commons [“Attribution-NonCommercial-NoDerivs 3.0 Unported”](#) license.

Pre-review only

# BMJ Open

## Impact of a short version of the CONSORT checklist for peer reviewers to improve the reporting of randomised controlled trials published in biomedical journals: study protocol for a randomised controlled trial

|                                 |                                                                                                                                                                                                                                                                                                                                                                                                                                                                                                                                                                                                                                                                                                                                                                                                                                                                                                                                                                                                                                                                                                                                                                                        |
|---------------------------------|----------------------------------------------------------------------------------------------------------------------------------------------------------------------------------------------------------------------------------------------------------------------------------------------------------------------------------------------------------------------------------------------------------------------------------------------------------------------------------------------------------------------------------------------------------------------------------------------------------------------------------------------------------------------------------------------------------------------------------------------------------------------------------------------------------------------------------------------------------------------------------------------------------------------------------------------------------------------------------------------------------------------------------------------------------------------------------------------------------------------------------------------------------------------------------------|
| Journal:                        | <i>BMJ Open</i>                                                                                                                                                                                                                                                                                                                                                                                                                                                                                                                                                                                                                                                                                                                                                                                                                                                                                                                                                                                                                                                                                                                                                                        |
| Manuscript ID                   | bmjopen-2019-035114.R1                                                                                                                                                                                                                                                                                                                                                                                                                                                                                                                                                                                                                                                                                                                                                                                                                                                                                                                                                                                                                                                                                                                                                                 |
| Article Type:                   | Protocol                                                                                                                                                                                                                                                                                                                                                                                                                                                                                                                                                                                                                                                                                                                                                                                                                                                                                                                                                                                                                                                                                                                                                                               |
| Date Submitted by the Author:   | 05-Feb-2020                                                                                                                                                                                                                                                                                                                                                                                                                                                                                                                                                                                                                                                                                                                                                                                                                                                                                                                                                                                                                                                                                                                                                                            |
| Complete List of Authors:       | Speich, Benjamin; University of Oxford, Centre for Statistics in Medicine, Nuffield Department of Orthopaedics, Rheumatology and Musculoskeletal Sciences<br>Schroter, Sara; BMJ Editorial,<br>Briel, Matthias; University of Basel, Basel Institute for Clinical Epidemiology and Biostatistics, Department of Clinical Research, University Hospital Basel<br>Moher, David; Ottawa Hospital Research Institute, Ottawa Methods Centre<br>Puebla, Iratxe ; PLOS ONE, PLOS ONE, Public Library of Science, San Francisco, California, United States of America and Cambridge<br>Clark, Alejandra ; PLOS One, PLOS ONE, Public Library of Science, San Francisco, California, United States of America and Cambridge<br>Maia Schlüssel, Michael; University of Oxford, Centre for Statistics in Medicine, Nuffield Department of Orthopaedics, Rheumatology and Musculoskeletal Sciences<br>Ravaud, Philippe; Universite Paris Descartes,<br>Boutron, Isabelle; Université Paris Descartes, Centre d'épidémiologie clinique<br>Hopewell, Sally; University of Oxford, Centre for Statistics in Medicine, Nuffield Department of Orthopaedics, Rheumatology and Musculoskeletal Sciences |
| <b>Primary Subject Heading</b>: | Medical publishing and peer review                                                                                                                                                                                                                                                                                                                                                                                                                                                                                                                                                                                                                                                                                                                                                                                                                                                                                                                                                                                                                                                                                                                                                     |
| Secondary Subject Heading:      | Medical education and training, Medical publishing and peer review, Research methods                                                                                                                                                                                                                                                                                                                                                                                                                                                                                                                                                                                                                                                                                                                                                                                                                                                                                                                                                                                                                                                                                                   |
| Keywords:                       | Protocols & guidelines < HEALTH SERVICES ADMINISTRATION & MANAGEMENT, Quality in health care < HEALTH SERVICES ADMINISTRATION & MANAGEMENT, MEDICAL EDUCATION & TRAINING, STATISTICS & RESEARCH METHODS                                                                                                                                                                                                                                                                                                                                                                                                                                                                                                                                                                                                                                                                                                                                                                                                                                                                                                                                                                                |
|                                 |                                                                                                                                                                                                                                                                                                                                                                                                                                                                                                                                                                                                                                                                                                                                                                                                                                                                                                                                                                                                                                                                                                                                                                                        |

1  
2  
3  
4  
5  
6  
7  
8  
9  
10  
11  
12  
13  
14  
15  
16  
17  
18  
19  
20  
21  
22  
23  
24  
25  
26  
27  
28  
29  
30  
31  
32  
33  
34  
35  
36  
37  
38  
39  
40  
41  
42  
43  
44  
45  
46  
47  
48  
49  
50  
51  
52  
53  
54  
55  
56  
57  
58  
59  
60

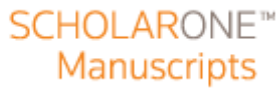



I, the Submitting Author has the right to grant and does grant on behalf of all authors of the Work (as defined in the below author licence), an exclusive licence and/or a non-exclusive licence for contributions from authors who are: i) UK Crown employees; ii) where BMJ has agreed a CC-BY licence shall apply, and/or iii) in accordance with the terms applicable for US Federal Government officers or employees acting as part of their official duties; on a worldwide, perpetual, irrevocable, royalty-free basis to BMJ Publishing Group Ltd ("BMJ") its licensees and where the relevant Journal is co-owned by BMJ to the co-owners of the Journal, to publish the Work in this journal and any other BMJ products and to exploit all rights, as set out in our [licence](#).

The Submitting Author accepts and understands that any supply made under these terms is made by BMJ to the Submitting Author unless you are acting as an employee on behalf of your employer or a postgraduate student of an affiliated institution which is paying any applicable article publishing charge ("APC") for Open Access articles. Where the Submitting Author wishes to make the Work available on an Open Access basis (and intends to pay the relevant APC), the terms of reuse of such Open Access shall be governed by a Creative Commons licence – details of these licences and which [Creative Commons](#) licence will apply to this Work are set out in our licence referred to above.

Other than as permitted in any relevant BMJ Author's Self Archiving Policies, I confirm this Work has not been accepted for publication elsewhere, is not being considered for publication elsewhere and does not duplicate material already published. I confirm all authors consent to publication of this Work and authorise the granting of this licence.

1  
2  
3 1 **Impact of a short version of the CONSORT checklist for peer reviewers to improve the**  
4  
5 2 **reporting of randomised controlled trials published in biomedical journals: study**  
6  
7 3 **protocol for a randomised controlled trial**

8  
9 4 Benjamin Speich<sup>1,2,\*</sup>, Sara Schroter<sup>3</sup>, Matthias Briel<sup>2,4</sup>, David Moher<sup>5,6</sup>, Iratxe Puebla<sup>7</sup>,  
10  
11 5 Alejandra Clark<sup>7</sup>, Michael M Schlusser<sup>1,8</sup>, Philippe Ravaud<sup>9,10</sup>, Isabelle Boutron<sup>9,10</sup>, Sally  
12  
13 6 Hopewell<sup>1</sup>  
14  
15  
16  
17

18 8 <sup>1</sup>Centre for Statistics in Medicine, Nuffield Department of Orthopaedics, Rheumatology and  
19  
20 9 Musculoskeletal Sciences, University of Oxford, Oxford, United Kingdom

21  
22 10 <sup>2</sup>Basel Institute for Clinical Epidemiology and Biostatistics, Department of Clinical Research,  
23  
24 11 University Hospital Basel, University of Basel, Basel, Switzerland

25  
26 12 <sup>3</sup>The BMJ, London, United Kingdom

27  
28 13 <sup>4</sup>Department of Health Research Methods, Evidence, and Impact, McMaster University,  
29  
30 14 Hamilton, Canada

31  
32 15 <sup>5</sup>Centre for Journalology, Clinical Epidemiology Program, Ottawa Hospital Research Institute,  
33  
34 16 Canada

35  
36 17 <sup>6</sup>School of Epidemiology and Public Health, Faculty of Medicine, University of Ottawa

37  
38 18 <sup>7</sup>*PLOS ONE*, Public Library of Science, San Francisco, California, United States of America  
39  
40 19 and Cambridge, United Kingdom

41  
42 20 <sup>8</sup>The EQUATOR Network, Oxford, United Kingdom

43  
44 21 <sup>9</sup>Centre d'Épidémiologie Clinique, Hôpital Hôtel-Dieu, Assistance Publique Hôpitaux de Paris  
45  
46 22 (APHP) F-75004 Paris, France

47  
48 23 <sup>10</sup>Université de Paris, CRESS, Inserm, INRA, F-75004, Paris, France  
49  
50  
51  
52

53  
54 25 \*Corresponding author:

55  
56 26 Benjamin Speich, PhD,  
57 27 Centre for Statistics in Medicine, Nuffield Department of Orthopaedics, Rheumatology and  
58 28 Musculoskeletal Sciences,  
59  
60

1  
2  
3 29 University of Oxford,  
4 30 Windmill Road  
5 31 OX3 7LD Oxford  
6 32 United Kingdom  
7 33 Email: benjamin.speich@ndorms.ox.ac.uk  
8  
9

10  
11 34 E-mail addresses of all co-authors:  
12

13 35 Benjamin Speich <benjamin.speich@ndorms.ox.ac.uk>  
14

15 36 Sara Schroter <sschroter@bmj.com>  
16

17 37 Matthias Briel <matthias.briel@usb.ch>  
18

19 38 David Moher <dmoher@ohri.ca>  
20

21 39 Iratxe Puebla <ipuebla@plos.org>  
22

23 40 Alejandra Clark <aclark@plos.org>  
24

25 41 Michael M Schlusser <michael.schlusser@ndorms.ox.ac.uk>  
26

27 42 Philippe Ravaud <philipperavaud@gmail.com>  
28

29 43 Isabelle Boutron <isabelle.boutron@aphp.fr>  
30

31 44 Sally Hopewell <sally.hopewell@csm.ox.ac.uk>  
32  
33

34 45

35  
36 46 **Running title:** CONSORT for Peer Review (CONSORT-PR)  
37

38 47 **Keywords:** CONSORT; reporting guidelines; randomised controlled trials as topic; peer  
39  
40 48 review; meta-research  
41  
42  
43  
44  
45  
46  
47  
48  
49  
50  
51  
52  
53  
54  
55  
56  
57  
58  
59  
60



1  
2  
3 49 **Abstract**  
4  
5

6 50 **Introduction:** Transparent and accurate reporting is essential for readers to adequately  
7  
8 51 interpret the results of a study. Journals can play a vital role in improving the reporting of  
9  
10 52 published randomised controlled trials (RCTs). We describe an RCT to evaluate our  
11  
12 53 hypothesis that asking peer reviewers to check whether the most important and poorly reported  
13  
14 54 CONSORT (CONsolidated Standards for Reporting Trials) items are adequately reported, will  
15  
16 55 result in higher adherence to CONSORT guidelines in published RCTs.  
17

18  
19 56 **Methods and Analysis:** Manuscripts presenting the primary results of RCTs submitted to  
20  
21 57 participating journals will be randomised to either the intervention group (peer reviewers will  
22  
23 58 receive a reminder and short explanation of the ten most important and poorly reported  
24  
25 59 CONSORT items; they will be asked to check if these items are reported in the submitted  
26  
27 60 manuscript) or a control group (usual journal practice). The primary outcome will be the mean  
28  
29 61 proportion of the ten items that are adequately reported in the published articles. Peer  
30  
31 62 reviewers and manuscript authors will not be informed of the study hypothesis, design, or  
32  
33 63 intervention. Outcomes will be assessed in duplicate from published articles by two data  
34  
35 64 extractors (at least one blinded to the intervention). We will enrol eligible manuscripts until a  
36  
37 65 minimum of 83 articles per group (166 in total) are published.  
38  
39

40  
41 66 **Ethics and Dissemination:** This pragmatic RCT was approved by the Medical Sciences  
42  
43 67 Interdivisional Research Ethics Committee of the University of Oxford (R62779/RE001). If this  
44  
45 68 intervention is effective, it could be implemented by all medical journals without requiring large  
46  
47 69 additional resources at journal level. Findings will be disseminated through presentations in  
48  
49 70 relevant conferences and peer-reviewed publications. This trial is registered on the Open  
50  
51 71 Science Framework (<https://osf.io/c4hn8>).  
52  
53

54 72  
55  
56  
57  
58  
59  
60

## 73 **Strengths and limitations of this study**

- 74 • Pragmatic randomised controlled trial (RCT) with individual randomisation of real  
75 manuscripts describing RCTs submitted to a variety of journals.
- 76 • Main outcomes will be assessed from publicly available sources (i.e. published  
77 articles).
- 78 • If this simple intervention is effective, it could be implemented by journals without  
79 requiring large additional resources at journal level.
- 80 • The intervention could not be included within the email from journal with the link to the  
81 manuscript for review, risking peer reviewers will potentially ignore the separate email  
82 containing the CONSORT reminder.

83

## 84 Introduction

### 85 Background and rationale

86 There is substantial agreement that well conducted and reported randomised controlled trials  
87 (RCTs) generate the most trustworthy evidence when evaluating newly developed or existing  
88 clinical interventions.<sup>1-3</sup> For clinicians, scientists and decision makers, published articles are  
89 often the only way to know how a study was conducted. In order to judge the internal and  
90 external validity of RCTs, it is crucial that these articles present transparent, accurate and  
91 unbiased information about the methods and conduct of the RCT.

92  
93 To improve the quality and transparency of clinical and epidemiological research, the  
94 EQUATOR (Enhancing the Quality and Transparency of Research) Network was founded in  
95 2006 and officially launched in 2008.<sup>4-10</sup> This international network, which assists in the  
96 development of reporting guidelines and actively promotes their use, consists of  
97 methodologists, epidemiologists, reporting guideline developers, statisticians, clinicians and  
98 journal editors.

99  
100 The CONSORT Statement (CONsolidated Standards of Reporting Trials) is perhaps the most  
101 prominent reporting guideline, designed to help improve the transparency and quality of  
102 reporting of RCTs.<sup>11-13</sup> It guides authors, peer reviewers and journal editors on the minimum  
103 information to be included in published reports of RCTs to facilitate critical judgment and  
104 interpretation of results and consists of 25 items and a flow diagram. The last update of the  
105 CONSORT Statement was published simultaneously in 10 leading medical journals in 2010<sup>13</sup>  
106 and currently CONSORT is endorsed by over 600 journals worldwide.<sup>14</sup>

107  
108 Despite some improvement in reporting following the endorsement of the CONSORT  
109 Statement, there remain major reporting deficiencies in published RCTs.<sup>3 15-21</sup> For example, a  
110 study of 1122 RCTs indexed in PubMed in December 2012 found that many did not define the

1  
2  
3 111 primary outcome (31%), state the sample size calculation (45%), or explain the method of  
4  
5 112 allocation concealment (50%).<sup>22</sup> This lack of transparency is a major limiting factor for readers  
6  
7 113 who assess an article in order to find the answer to a specific question; it is also a major  
8  
9 114 problem for scientists who perform systematic reviews and meta-analyses.  
10

11  
12 115

### 13 116 **Evidence to date**

14  
15  
16 117 Journals can play a vital role in improving the reporting of published RCTs. For example, a  
17  
18 118 survey of journals' 'Instructions to Authors' in 2014 found that 63% (106 of 168) of biomedical  
19  
20 119 journals mentioned CONSORT;<sup>23</sup> however of those journals only 38 (36%) required a  
21  
22 120 completed CONSORT checklist on submission. Such implementation indicates some  
23  
24 121 improvement over time compared to an assessment in 2007 when only 17 of 62 (27%) journals  
25  
26 122 requested the CONSORT checklist on submission.<sup>24</sup> A study using interrupted time series  
27  
28 123 analysis and assessing if the CONSORT checklist for reporting abstracts of RCTs had an effect  
29  
30 124 on reporting quality found that results were better reported in journals which had an active  
31  
32 125 editorial policy to implement the checklist.<sup>25</sup>  
33  
34  
35 126

36  
37 127 A scoping review conducted in 2017 by Blanco and colleagues summarised different  
38  
39 128 interventions aimed at improving adherence to reporting guidelines.<sup>26</sup> They identified a number  
40  
41 129 of different interventions, some of which had been evaluated at journals. However, all the  
42  
43 130 interventions, except requesting submission of checklists from authors, required additional  
44  
45 131 resources from the journal (e.g. internal peer review by editorial assistants or an additional  
46  
47 132 peer-reviewer round conducted by a senior statistician using appropriate reporting guidelines<sup>27-</sup>  
48  
49 133 <sup>29</sup>). Therefore, it is unlikely that these interventions will be implemented in the majority of  
50  
51 134 journals, especially smaller journals with limited resources. Another study found that providing  
52  
53 135 authors with a web-based CONSORT tool, which combined different CONSORT extensions  
54  
55 136 and provided authors with a customised checklist, did not improve reporting when used at the  
56  
57 137 manuscript revision stage.<sup>30</sup> However, a study examining "the nature and extent of changes  
58  
59  
60

1  
2  
3 138 made to manuscripts after peer review, in relation to the reporting of methodological aspects  
4  
5 139 of RCTs” and “the type of changes requested by peer reviewers” found that peer review did  
6  
7 140 lead to some improvement in reporting.<sup>27</sup>  
8

9 141  
10  
11 142 The role of peer reviewers and expectations of them is varied.<sup>31</sup> While CONSORT checklists  
12  
13 143 are sometimes available for peer reviewers to check, they are not typically instructed to assess  
14  
15 144 this information as part of their review and there have been no studies evaluating the effect of  
16  
17 145 asking them to do this. We plan to evaluate the impact of giving peer reviewers a short version  
18  
19 146 of the CONSORT checklist together with a brief explanation of the items and asking them to  
20  
21 147 check if they are adequately reported.  
22  
23

24 148

## 27 149 **Methods and analysis**

### 30 150 **Objective**

31  
32  
33 151 The objective of this study is to evaluate the impact of giving peer reviewers, during the  
34  
35 152 standard peer review process, a short version of the CONSORT checklist (C-short) together  
36  
37 153 with a brief explanation of the items and asking them to check if they are adequately reported  
38  
39 154 in the manuscript.  
40

41 155

### 44 156 **Study design**

45  
46  
47 157 This study is a multicentre superiority RCT with submitted manuscripts as the unit of  
48  
49 158 randomisation (Figure 1; allocation ratio 1:1). This study protocol was written in adherence to  
50  
51 159 the SPIRIT guidelines (supplementary file).<sup>32</sup>  
52

53 160

### 55 161 **Study setting and eligibility criteria**

56  
57 162 The population will be defined on two levels: included journals and included manuscripts.  
58  
59  
60

1  
2  
3 1634  
5 164 Inclusion criteria for journals:

6  
7 165 Included journals must: i) endorse the CONSORT Statement by mentioning it in the journals'  
8  
9 166 Instruction to Authors; ii) have published primary results of at least five RCTs in 2017 (identified  
10  
11 167 using a PubMed search). To be efficient, we plan to contact (via email) the editors of eligible  
12  
13 168 journals from specific publishers (e.g. BMJ Publishing Group; Public Library of Science  
14  
15 169 [PLOS]) instead of separate journals. A description of the requirements for participation and a  
16  
17 170 short summary information sheet will be included as part of the email invitation sent to journal  
18  
19 171 editors. If a journal is eligible, and the editor agrees to take part, the editor will need to provide  
20  
21 172 access to their editorial system (e.g. ScholarOne, Editorial Manager) to enable the external  
22  
23 173 researcher (BS) to screen and randomise eligible manuscripts. In cases where this is not  
24  
25 174 possible, we will explore with individual journals if it would be possible to grant limited access  
26  
27 175 (e.g. only rights to screen studies) or to handle the different steps without access to the editorial  
28  
29 176 system (e.g. screening through automated reports; intervention provided by a journal staff  
30  
31 177 member) and that the emails for the intervention would be sent by a member of the editorial  
32  
33 178 team.

34  
35  
36  
37 17938  
39 180 Inclusion criteria for manuscripts

- 40  
41 181 • All new manuscript submissions reporting the primary results of RCTs, which the  
42  
43 182 journal editor has decided to send out for external peer review. Since the 10 chosen  
44  
45 183 CONSORT checklist items (C-short) are applicable to different study designs, we will  
46  
47 184 include all manuscripts reporting the primary results of RCTs regardless of study design  
48  
49 185 (e.g. parallel group trial, cluster trial, superiority trial, non-inferiority/equivalence trials).

50  
51 186 Exclusion criteria for manuscripts

- 52  
53 187 • Manuscripts clearly presenting secondary trial results, additional time points, economic  
54  
55 188 analyses, or any other analyses.
- 56  
57 189 • Manuscripts which are clearly labelled as a pilot or feasibility study or animal studies.

- 1  
2  
3 190 • Manuscripts not sent for peer review.  
4  
5 191

6  
7 192 Details of journal manuscript submission and peer review processes, including consent and  
8  
9 193 potential confidentiality issues will be discussed in detail with each journal by teleconference  
10  
11 194 and/or face to face prior to the journal agreeing to take part to ensure that randomisation of  
12  
13 195 manuscripts is feasible.  
14  
15

16 196  
17  
18 197 In participating journals, the external researcher (BS) will check at least twice a week (by  
19  
20 198 screening automated submission lists) all research manuscripts that are sent out for external  
21  
22 199 peer review. As soon as the first invited peer reviewer accepts the invitation to review, the  
23  
24 200 manuscript will be randomised to the intervention or control arm (see “Randomisation” for more  
25  
26 201 details). It is possible that this process might be slightly different amongst different included  
27  
28 202 journals (e.g. that team members of a journal might be involved in the screening if limited or  
29  
30 203 no access to the journal’s editorial system is granted).  
31  
32

33 204

## 34 205 **Interventions**

35  
36 206

### 37 207 Control group: Usual practice

38  
39 208 After accepting to review a manuscript, peer reviewers will receive the automated, journal  
40  
41 209 specific standard email with general information as per each journal’s usual practice (e.g.  
42  
43 210 where to access the manuscript, date the peer review report is due).  
44  
45

46 211

### 47 212 Intervention group: C-short plus usual practice

48  
49 213 After accepting to review a manuscript, peer reviewers will receive the automated, journal  
50  
51 214 specific standard email with general information (identical to control group). In addition, peer  
52  
53 215 reviewers will receive an additional email from the editorial office that includes a short version  
54  
55 216 of the CONSORT checklist (C-short) together with a brief explanation of the items either as a  
56  
57  
58  
59  
60

1  
2  
3 217 table within the email or as an attachment - based on the preferences and possibilities of the  
4  
5 218 journal (Table 1, appendix 1). Peer reviewers will be asked to check whether the items in the  
6  
7 219 C-short checklist are addressed in the manuscript and to request authors to include these  
8  
9 220 items if they are not adequately reported. This second email (see appendix 1), containing the  
10  
11 221 C-short checklist together with a brief explanation, is not generated automatically within the  
12  
13 222 existing journal editorial systems (e.g. ScholarOne or Editorial Manager); it will be sent  
14  
15 223 manually by a researcher (BS) from the journal's editorial system or by a member of the  
16  
17 224 journal's staff. In both cases the email will appear to have come from the editorial office (not  
18  
19 225 the researcher).  
20  
21  
22

226

### 227 Development of the C-short checklist and explanation of items

228 For the development of C-short we chose the 10 most important and poorly reported  
229 CONSORT items as identified by a group of CONSORT experts in a previous study conducted  
230 by Hopewell and colleagues.<sup>30</sup> The selection of the items was based on expert opinion and  
231 empirical evidence whenever available.<sup>30</sup> In addition, to enable peer reviewers to better  
232 understand the items, we added a short explanation for each of the 10 items. These short  
233 explanations were extracted and amended from the CONSORT explanation and elaboration  
234 paper<sup>11</sup> and from COBWEB which is an online writing aid tool.<sup>33</sup> The short explanation was  
235 discussed and adapted by the scientific committee.

236

## 237 **Outcomes**

### 238 Primary outcome

239 The primary outcome of this study will be the difference in the mean proportion of adequately  
240 reported C-short items in published articles between the two groups.

241

### 242 Secondary outcomes

243 Secondary outcomes will include the following:



- 1  
2  
3 244 • Mean proportion of adequately reported C-short items in published articles considering  
4  
5 245 each item separately.  
6  
7 246 • Difference in mean proportion of adequately reported C-short items in published  
8  
9 247 articles considering each sub-item (see “Assessment of outcomes”) as a separate item.  
10  
11 248 • Time from assigning an editor to the first decision (as communicated to the author after  
12  
13 249 the first round of peer-review).  
14  
15  
16 250 • Proportion of manuscripts rejected after the first round of peer review.  
17  
18 251 • Proportion of manuscripts that will be published in the journal under study.  
19

20 252

21  
22 253 Additional outcomes:

- 23
- 
- 24 254 • Exploratory analysis of available peer reviewer comments (i.e. any references to
- 
- 25
- 
- 26 255 CONSORT).
- 
- 27

28  
29 256 For journals where peer reviewers’ comments are subsequently published alongside the  
30  
31 257 published article, we will examine the peer reviewers’ comments for any reference to  
32  
33 258 CONSORT and trial reporting. We will contact those journals which do not make peer  
34  
35 259 reviewers’ comments publicly available, to see if reviews could be provided for such analyses  
36  
37 260 under the condition that only anonymised data will be published.  
38

39 261

40  
41 262 Assessment of outcomes:42  
43 263 The outcomes will be assessed independently by two (blinded or at least partially blinded; see  
44  
45 264 “blinding”) outcome assessors with expertise in the design and reporting of clinical trials. Any  
46  
47 265 disagreement will be resolved by consensus or if necessary by consulting a third assessor. To  
48  
49 266 ensure consistency between reviewers, we will first pilot the data extraction form; any  
50  
51 267 disparities in the interpretation will be discussed and the data extraction form will be modified  
52  
53 268 accordingly.  
5455  
56 269  
57  
58  
59  
60

1  
2  
3 270 Adequate reporting of items will be assessed in duplicate from published full-text publications  
4  
5 271 following the same instructions as provided by the CONSORT C-short checklist.<sup>11</sup> The  
6  
7 272 following checklist items have, due to their complexity, sub-items which will be extracted  
8  
9 273 separately. The sub-items are highlighted in the short explanation of the intervention (see  
10  
11 274 Table 1 and appendix 1):

- 12  
13 275 • Outcomes (item 6a): (i) Define primary outcome, (ii) how it was measured, (iii) at what  
14  
15 276 time point, and (iv) the analysis metric (e.g. change from baseline, final value).
- 16  
17 277 • Sample size (item 7a): (i) The estimated outcomes in each group, (ii) the  $\alpha$  (type I) error  
18  
19 278 level, (iii) the statistical power (or the  $\beta$  (type II) error level), (iv) for continuous  
20  
21 279 outcomes, the standard deviation of the measurements
- 22  
23 280 • Blinding (item 11a): Is the blinding status clear for the following persons: (i) Healthcare  
24  
25 281 provider, (ii) patients, and (iii) outcome assessors.
- 26  
27 282 • Funding (item 25): (i) The funding source, and (ii) the role of funder in the design,  
28  
29 283 conduct, analysis, and reporting.

30  
31 284 All items will be judged as either “yes” meaning adequately reported, “no” meaning not  
32  
33 285 adequately reported or not reported at all, or “NA” meaning that this sub-item is not applicable  
34  
35 286 for this RCT. Items with different sub-items will only be judged as adequately reported if all  
36  
37 287 relevant sub-items were adequately reported.

38  
39 288  
40  
41 289 The outcomes “time from assigning an editor to the first decision”, “proportion of manuscripts  
42  
43 290 rejected after the first round of peer-review”, and “proportion of manuscripts that will be  
44  
45 291 published in the journal under study” will be extracted directly from the journal’s editorial system  
46  
47 292 or provided by the journal.

48  
49 293

### 50 294 **Participant timeline**

51  
52 295 The overview of the study schedule, including enrolment, intervention and assessments is  
53  
54 296 presented in Table 2.

55  
56 297

### 298 **Sample size**

299 For the sample size calculation, we hypothesised in a first scenario (Table 3) that the  
300 intervention C-short will result in a 25% relative increase in adequate reporting compared to  
301 the control (meaning that 70% of items will be adequately reported in the intervention group  
302 and 56% in the control group). This is based on a proportion of adequate reporting of 0.56 for  
303 the 10 most important and poorly reported items found in the control group of a previous study  
304 (meaning that a mean of 56% of the 10 most important and poorly reported items were  
305 reported).<sup>30</sup> The standard deviation (SD) in the same study was 0.23. However, we calculated  
306 our sample size to account for a slightly larger variability in our data (SD = 0.25). To  
307 demonstrate a significant difference with a power of 90% and a type 1 error at 5%, a total of  
308 136 published articles will be required in this scenario (68 per treatment arm; based on a two  
309 sided t-test).

310  
311 Two authors of this protocol, working for *PLOS ONE* (IP and AC), one of the participating  
312 journals, pointed out that 3 out of the 10 assessed items (i.e. item “Registration”, “Protocol”,  
313 and “Funding”) should always be implemented in submissions to their journal given their policy  
314 requirements for clinical trials. Assuming that this journal will recruit a high proportion of  
315 manuscripts, and that also other journals might update their templates, we increased the  
316 sample size in a second scenario, in which all these 3 items would have an overall adherence  
317 of 90% in the control arm (Table 3). This would entail an overall baseline adherence with the  
318 10 C-short items of 71%. Based on a two sided t-test, a sample size of 166 (83 per treatment  
319 arm) will have a power of 80% to find a 15% relative increase (71% adherence in control group;  
320 82% adherence in intervention group; SD = 0.25; a type 1 error at 5%).

321 Since the final sample size will be based on the number of articles published, rather than on  
322 the number of manuscripts randomised, eligible manuscripts will be randomised until 83  
323 articles are published in each arm (resulting in no less than 166 articles), to avoid loss of power  
324 due to potential imbalance between arms. Recruitment will be stopped as soon as both arms

1  
2  
3 325 reach the sample size of 83. After recruitment has stopped we will wait three months so that  
4  
5 326 manuscripts, which are still in production, can be published. Manuscripts which are published  
6  
7 327 after the three month period will be excluded  
8

9 328

### 11 329 **Randomisation and blinding**

12  
13  
14 330 Manuscripts meeting the eligibility criteria and sent out for external peer review by the journals  
15  
16 331 will be randomised into one of the two groups (allocation 1:1). The randomisation list will be  
17  
18 332 created by the Study-Randomizer® system<sup>34</sup> using random block sizes between 2 and 8 and  
19  
20 333 stratified by journal. As soon as the first peer reviewer accepts the invitation, the manuscript  
21  
22 334 will be included and randomised to one of the two study arms. One of the investigators (BS)  
23  
24 335 will log onto the Study-Randomizer® system<sup>34</sup> and enter the study identification number (ID;  
25  
26 336 provided by the journal), the study title, and the journal the study was submitted to.  
27  
28 337 Subsequently, all additional peer reviewers accepting the invitation to review the same  
29  
30 338 manuscript will receive the same group assignment as the first peer reviewer.  
31

32  
33 339

34  
35 340 Authors will be blinded to the intervention. Editors will not be actively informed about the  
36  
37 341 randomisation (possible exception listed under “Interventions”). To avoid potential bias, peer  
38  
39 342 reviewers and manuscript authors will not be informed of the study hypothesis, design and  
40  
41 343 intervention.  
42

43 344

44  
45 345 Outcomes will be assessed in duplicate (see “Assessment of outcomes”). At least one outcome  
46  
47 346 assessor will be blinded. Due to restricted resources the investigator conducting the  
48  
49 347 randomisation (BS) might be involved in the data-extraction from published manuscripts.  
50

51 348

### 55 349 **Data analysis**

1  
2  
3 350 All quantitative variables will be described using means and standard deviations, or medians  
4  
5 351 and interquartile ranges in case severe departures from a normal distribution are identified.  
6  
7 352 Data distributions will be inspected visually (i.e. by histograms) instead of performing formal  
8  
9 353 statistical tests for normality. Categorical variables will be described using frequencies and  
10  
11 354 percentages. For the primary and secondary outcomes, we will estimate the mean difference  
12  
13 355 between the two groups and report them with respective 95% confidence intervals. No interim  
14  
15 356 analysis will be conducted.

16  
17  
18  
19 357

### 20 21 358 Populations of analysis

22  
23  
24 359 The main population for analysis will be all manuscripts randomised and accepted for  
25  
26 360 publication in the participating journals. In contrast to RCTs conducted with patients, where  
27  
28 361 losses to follow-up need to be carefully considered (e.g. multiple imputation of missing data),  
29  
30 362 we are only interested in the reporting adherence of RCTs that are published. As such, we will  
31  
32 363 exclude randomised manuscripts that were not published from the main analysis. All outcomes  
33  
34 364 will be calculated based on the main population. The secondary outcome “Time to the first  
35  
36 365 decision”, will additionally be calculated considering all randomised manuscripts (including the  
37  
38 366 ones which were not published). For all analyses a p-value of 0.05 (5% significance level) will  
39  
40 367 be used to indicate statistical significance. Exact p-values will be presented up to three decimal  
41  
42 368 places. We anticipate there will be no missing data in this study, neither at the individual C-  
43  
44 369 short items, nor at the manuscript level. This is due to the study design, which will include only  
45  
46 370 the randomised manuscripts that are accepted for publication. We will analyse if the rate of  
47  
48 371 manuscripts rejected after the first round of peer-review and if the proportion of manuscripts  
49  
50 372 that will be published differentiate amongst the two study arms (both secondary results).

51  
52  
53  
54  
55 373  
56  
57  
58  
59  
60

1  
2  
3 374 Analysis of primary endpoint  
4

5 375 The effect of the intervention will be estimated as the mean difference in the proportion of C-  
6  
7 376 short items adequately reported between the study arms. If the data on the primary outcome  
8  
9 377 is normally distributed, groups will be compared using an unpaired Student's t-test. If the data  
10  
11 378 is not normally distributed, comparisons will be performed using a non-parametric equivalent  
12  
13 379 test (i.e. Wilcoxon-Mann-Whitney test).  
14  
15  
16

17 380 Analysis of secondary endpoints  
18

19  
20 381 To investigate the effect of the intervention on the secondary outcomes, mean differences with  
21  
22 382 respective 95% confidence intervals will be reported. If normality is not observed for any of the  
23  
24 383 continuous secondary outcomes, the same strategy adopted for the primary outcome (use of  
25  
26 384 a non-parametric equivalent to the Student's t-test) will be used.  
27  
28

29 385  
30

31  
32 386 Pre-specified subgroup analysis  
33

34  
35 387 No formal subgroup comparative analysis is planned for the primary or secondary outcomes.  
36  
37 388 However, the effect of the intervention on the primary outcome within subgroups will be  
38  
39 389 presented using forest plots to visually examine whether it may differ according to some  
40  
41 390 variables, such as: (1) Journals that actively implement the CONSORT Statement (defined as  
42  
43 391 requiring authors to submit a completed CONSORT checklist alongside their manuscript) vs.  
44  
45 392 journals that are not actively implementing the CONSORT Statement; (2) sample size of  
46  
47 393 included RCTs ( $n < 100$  vs.  $n \geq 100$ ); and (3) impact factor ( $<5$ ,  $5.1-10$ ;  $>10$ ) as there is  
48  
49 394 evidence that higher impact factor as well as higher sample size are associated with higher  
50  
51 395 adherence to reporting guidelines.<sup>35</sup> Sub-group analysis at the journal level will only be  
52  
53 396 conducted when sufficient journals are in each group so that no results of individual journals  
54  
55 397 are revealed. All analyses will be exploratory, with the aim of supporting new hypothesis  
56  
57 398 generation, rather than being conclusive.  
58  
59  
60

399

**400 Data management and confidentiality**

401 Outcomes from publications will be assessed and extracted in duplicate. Since this information  
402 is not confidential, we will use freely available online forms (e.g. Google forms) for data  
403 extraction from published RCTs. Data entered will be validated for completeness.

404 Data from the journal's editorial system (e.g. title of manuscript, first author, randomisation ID,  
405 journal, date when manuscript was assigned to an editor, date when the final decision was  
406 made, final editorial decision, number of peer reviewers who reviewed the manuscript, the peer  
407 review reports [if available]) will be extracted (by BS or a member of the journal's staff),  
408 anonymised and entered in password protected files which are saved on a server from the  
409 University of Oxford. Data will be managed and curated according to University of Oxford  
410 regulations, which includes regular back-up (on a daily basis) of the virtual drives where the  
411 data are stored. No auditing or data monitoring is planned (as outcomes are directly extracted  
412 from journal's editorial system or in duplicate from published RCTs).

413 The raw data extracted from the included published manuscripts can be made openly  
414 accessible in an anonymised way (i.e. giving the included RCT a number instead of identifying  
415 them). Derived/aggregated data, including anonymised information generated from the  
416 journal's editorial system, will be stored and made available to the research community when  
417 the project ends (see also "Publication policy and access to data"). Where appropriate, the  
418 researcher who has access to the journal's editorial system (BS) and anyone else who will see  
419 the identifiable data will sign a confidentially agreement with the participating journals,  
420 confirming that they will not share identifiable data with any other party. Publishers such as the  
421 BMJ state in their Company Privacy Statement that reviews and manuscripts may be used for  
422 quality improvement purposes and that is the nature of this research. Furthermore, peer  
423 reviewers for all BMJ journals receive the following statement in their invitation letter "*We are*  
424 *constantly trying to find ways of improving the peer review system and have an ongoing*

1  
2  
3 425 *programme of research. If you do not wish your review entered into a study please let us know*  
4  
5 426 *by emailing [...] as soon as possible.”*  
6  
7

8 427  
9

## 10 428 **Trial registration**

11  
12  
13  
14 429 This trial was denied registration on ClinicalTrials.gov as the study is not a clinical study that  
15  
16 430 assesses a health outcome in human subjects. Instead we registered the trial on the Open  
17  
18 431 Science Framework (<https://osf.io/c4hn8>). The first manuscript was randomised in July 2019.  
19  
20 432 We expect that recruitment will be finished in summer 2021.  
21  
22

23 433  
24  
25

## 26 434 **Patient and public involvement**

27  
28  
29 435 Given the specific study topic, the steering committee agreed that patient or public involvement  
30  
31 436 is not needed for this study.  
32  
33

34 437  
35  
36

## 37 438 **Discussion**

38  
39  
40  
41 439 RCTs are the current gold standard for evaluating any new intervention in evidence-based  
42  
43 440 medicine. Unfortunately, not all RCTs are of high quality. In fact, there are several well-known  
44  
45 441 shortcomings with respect to reporting.<sup>3 15-20</sup> It is important to note that adhering to the  
46  
47 442 CONSORT Statement does not mean that the study is of high quality. However, reporting all  
48  
49 443 items from the CONSORT checklist will enable readers to adequately judge the quality of  
50  
51 444 RCTs.  
52  
53

54 445  
55

56 446 In this RCT we will test if a simple intervention in the form of asking peer reviewers to check  
57  
58 447 whether selected CONSORT items are adequately addressed will increase the proportion of  
59  
60



1  
2  
3 448 reporting completeness in the published RCTs in the participating journals. A multicentre  
4  
5 449 parallel arm RCT with randomisation at the individual manuscript level was chosen instead of  
6  
7 450 a cluster RCT because the risk of “contamination” at journal level was judged as low as the  
8  
9 451 intervention will be implemented by an external researcher (i.e. BS) or a member of the journal  
10  
11 452 staff (e.g. personnel from Editorial services). The likelihood of contamination due to peer  
12  
13 453 reviewers being invited to assess several RCTs and therefore becoming exposed to both  
14  
15 454 intervention arms was judged small and therefore we do not plan to adjust for clustering by  
16  
17 455 journal. Originally we planned to implement the intervention within the original instruction to  
18  
19 456 peer reviewer email which is sent out as soon as a peer reviewer accepts the invitation from  
20  
21 457 the journal. However, as these emails are sent automatically by the journal’s editorial system  
22  
23 458 we would have needed to modify the software from each journal to make sure that only half of  
24  
25 459 the manuscripts administered the intervention. After our first discussion with journal editors  
26  
27 460 and journal staff, we realised that this approach is not feasible and therefore decided to  
28  
29 461 implement the intervention in the form of a separate email. We intended to conduct this RCT  
30  
31 462 in a pragmatic way so that results “would also be relevant to [...] people who decide whether  
32  
33 463 to implement the intervention on the basis of its results”.<sup>36</sup> Hence we chose to assess outcomes  
34  
35 464 from published articles and not from manuscripts after the first round of revisions. Ideally, the  
36  
37 465 full impact of the intervention would also be measured including all versions of randomised  
38  
39 466 manuscripts in the final statistical analysis. However, due to confidentiality issues and limited  
40  
41 467 resources we will not be able to evaluate manuscript versions prior to publication.  
42  
43  
44  
45

46 468

47  
48  
49 469 A selection of CONSORT items was chosen instead of the entire CONSORT checklist as we  
50  
51 470 did not want to put too high a burden on peer reviewers, which could increase the risk that  
52  
53 471 peer reviewers ignore our reminder.  
54  
55

56 472  
57  
58  
59  
60

1  
2  
3 473 Should the proposed intervention be successful in improving the reporting quality of published  
4  
5 474 RCTs, as measured by the adherence to CONSORT, the intervention could be implemented  
6  
7 475 at the journal level without requiring a large amount of additional resources. In addition, very  
8  
9 476 similar interventions for other article types (e.g. systematic reviews, trial protocols) and  
10  
11 477 corresponding guidelines (e.g. PRISMA, SPIRIT) could be easily implemented too.  
12

13  
14 478

### 17 479 **Ethics and dissemination**

20 480 Ethical approval has been obtained from the Medical Sciences Interdivisional Research Ethics  
21  
22 481 Committee of the University of Oxford (R62779/RE001). The original approved study protocol  
23  
24 482 is available in Appendix 2. The WHO Trial Registration Data Set is available in Appendix 3.  
25

27 483 The results from this study will be published in a peer reviewed journal irrespective of the study  
28  
29 484 results. Authorship of publications will be granted according to the criteria of the International  
30  
31 485 Committee of Medical Journal Editors (ICMJE). We plan to make the anonymised dataset,  
32  
33 486 including the data from the published articles, available as a supplementary file of the main  
34  
35 487 publication.  
36  
37  
38  
39  
40  
41  
42  
43  
44  
45  
46  
47  
48  
49  
50  
51  
52  
53  
54  
55  
56  
57  
58  
59  
60

## Full references

1. Duley L, Antman K, Arena J, et al. Specific barriers to the conduct of randomized trials. *Clin Trials* 2008;5(1):40-8. doi: 10.1177/1740774507087704
2. Collins R, MacMahon S. Reliable assessment of the effects of treatment on mortality and major morbidity, I: clinical trials. *Lancet* 2001;357(9253):373-80. doi: 10.1016/S0140-6736(00)03651-5
3. Chalmers I. Unbiased, relevant, and reliable assessments in health care: important progress during the past century, but plenty of scope for doing better. *BMJ* 1998;317(7167):1167-8.
4. Altman DG, Simera I, Hoey J, et al. EQUATOR: reporting guidelines for health research. *Lancet* 2008;371(9619):1149-50. doi: 10.1016/S0140-6736(08)60505-X
5. Simera I. EQUATOR Network collates resources for good research. *BMJ* 2008;337:a2471. doi: 10.1136/bmj.a2471
6. Simera I, Altman DG. Writing a research article that is "fit for purpose": EQUATOR Network and reporting guidelines. *Evid Based Med* 2009;14(5):132-4. doi: 10.1136/ebm.14.5.132
7. Simera I, Altman DG, Moher D, et al. Guidelines for reporting health research: the EQUATOR network's survey of guideline authors. *PLoS Med* 2008;5(6):e139. doi: 10.1371/journal.pmed.0050139
8. Simera I, Moher D, Hirst A, et al. Transparent and accurate reporting increases reliability, utility, and impact of your research: reporting guidelines and the EQUATOR Network. *BMC Med* 2010;8:24. doi: 10.1186/1741-7015-8-24
9. Simera I, Moher D, Hoey J, et al. The EQUATOR Network and reporting guidelines: Helping to achieve high standards in reporting health research studies. *Maturitas* 2009;63(1):4-6. doi: 10.1016/j.maturitas.2009.03.011
10. Altman DG, Simera I. A history of the evolution of guidelines for reporting medical research: the long road to the EQUATOR Network. *J R Soc Med* 2016;109(2):67-77. doi: 10.1177/0141076815625599 [published Online First: 2016/02/18]
11. Moher D, Hopewell S, Schulz KF, et al. CONSORT 2010 explanation and elaboration: updated guidelines for reporting parallel group randomised trials. *BMJ* 2010;340:c869. doi: 10.1136/bmj.c869
12. Schulz KF, Altman DG, Moher D, et al. CONSORT 2010 Statement: updated guidelines for reporting parallel group randomised trials. *BMC Med* 2010;8:18. doi: 10.1186/1741-7015-8-18
13. Schulz KF, Altman DG, Moher D, et al. CONSORT 2010 statement: updated guidelines for reporting parallel group randomised trials. *BMJ* 2010;340:c332. doi: 10.1136/bmj.c332
14. CONSORT Transparent Reporting of Trials. Endorsers. Journals and Organizations. <http://www.consort-statement.org/about-consort/endorsers> [accessed: 27 February 2019]
15. Chan AW, Hrobjartsson A, Haahr MT, et al. Empirical evidence for selective reporting of outcomes in randomized trials: comparison of protocols to published articles. *JAMA* 2004;291(20):2457-65. doi: 10.1001/jama.291.20.2457
16. Chalmers I, Glasziou P. Avoidable waste in the production and reporting of research evidence. *Lancet* 2009;374(9683):86-9. doi: 10.1016/S0140-6736(09)60329-9
17. Ioannidis JP, Lau J. Completeness of safety reporting in randomized trials: an evaluation of 7 medical areas. *JAMA* 2001;285(4):437-43.
18. Glasziou P, Meats E, Heneghan C, et al. What is missing from descriptions of treatment in trials and reviews? *BMJ* 2008;336(7659):1472-4. doi: 10.1136/bmj.39590.732037.47 [published Online First: 2008/06/28]

19. Boutron I, Dutton S, Ravaud P, et al. Reporting and interpretation of randomized controlled trials with statistically nonsignificant results for primary outcomes. *JAMA* 2010;303(20):2058-64. doi: 10.1001/jama.2010.651
20. Hopewell S, Dutton S, Yu LM, et al. The quality of reports of randomised trials in 2000 and 2006: comparative study of articles indexed in PubMed. *BMJ* 2010;340:c723. doi: 10.1136/bmj.c723
21. Turner L, Shamseer L, Altman DG, et al. Does use of the CONSORT Statement impact the completeness of reporting of randomised controlled trials published in medical journals? A Cochrane review. *Syst Rev* 2012;1:60. doi: 10.1186/2046-4053-1-60
22. Odutayo A, Emdin CA, Hsiao AJ, et al. Association between trial registration and positive study findings: cross sectional study (Epidemiological Study of Randomized Trials-ESORT). *BMJ* 2017;356:j917. doi: 10.1136/bmj.j917 [published Online First: 2017/03/16]
23. Shamseer L, Hopewell S, Altman DG, et al. Update on the endorsement of CONSORT by high impact factor journals: a survey of journal "Instructions to Authors" in 2014. *Trials* 2016;17(1):301. doi: 10.1186/s13063-016-1408-z [published Online First: 2016/06/28]
24. Hopewell S, Altman DG, Moher D, et al. Endorsement of the CONSORT Statement by high impact factor medical journals: a survey of journal editors and journal 'Instructions to Authors'. *Trials* 2008;9:20. doi: 10.1186/1745-6215-9-20 [published Online First: 2008/04/22]
25. Hopewell S, Ravaud P, Baron G, et al. Effect of editors' implementation of CONSORT guidelines on the reporting of abstracts in high impact medical journals: interrupted time series analysis. *BMJ* 2012;344:e4178. doi: 10.1136/bmj.e4178 [published Online First: 2012/06/26]
26. Blanco D, Altman D, Moher D, et al. Scoping review on interventions to improve adherence to reporting guidelines in health research. *BMJ Open* 2019;9(5):e026589. doi: 10.1136/bmjopen-2018-026589 [published Online First: 2019/05/12]
27. Hopewell S, Collins GS, Boutron I, et al. Impact of peer review on reports of randomised trials published in open peer review journals: retrospective before and after study. *BMJ* 2014;349:g4145. doi: 10.1136/bmj.g4145
28. Cobo E, Selva-O'Callaghan A, Ribera JM, et al. Statistical reviewers improve reporting in biomedical articles: a randomized trial. *PLoS One* 2007;2(3):e332. doi: 10.1371/journal.pone.0000332 [published Online First: 2007/03/29]
29. Cobo E, Cortes J, Ribera JM, et al. Effect of using reporting guidelines during peer review on quality of final manuscripts submitted to a biomedical journal: masked randomised trial. *Bmj* 2011;343:d6783. doi: 10.1136/bmj.d6783 [published Online First: 2011/11/24]
30. Hopewell S, Boutron I, Altman DG, et al. Impact of a web-based tool (WebCONSORT) to improve the reporting of randomised trials: results of a randomised controlled trial. *BMC Med* 2016;14(1):199. doi: 10.1186/s12916-016-0736-x
31. Glonti K, Cauchi D, Cobo E, et al. A scoping review on the roles and tasks of peer reviewers in the manuscript review process in biomedical journals. *BMC Med* 2019;17(1):118. doi: 10.1186/s12916-019-1347-0 [published Online First: 2019/06/21]
32. Chan AW, Tetzlaff JM, Gotzsche PC, et al. SPIRIT 2013 explanation and elaboration: guidance for protocols of clinical trials. *BMJ* 2013;346:e7586. doi: 10.1136/bmj.e7586
33. Barnes C, Boutron I, Giraudeau B, et al. Impact of an online writing aid tool for writing a randomized trial report: the COBWEB (Consort-based WEB tool) randomized controlled trial. *BMC Med* 2015;13:221. doi: 10.1186/s12916-015-0460-y [published Online First: 2015/09/16]
34. Study Randomizer. <https://studyrandomizer.com/> [accessed: 8. July 2019].
35. Jin Y, Sanger N, Shams I, et al. Does the medical literature remain inadequately described despite having reporting guidelines for 21 years? - A systematic review of

1  
2  
3  
4  
5  
6  
7  
8  
9  
10  
11  
12  
13  
14  
15  
16  
17  
18  
19  
20  
21  
22  
23  
24  
25  
26  
27  
28  
29  
30  
31  
32  
33  
34  
35  
36  
37  
38  
39  
40  
41  
42  
43  
44  
45  
46  
47  
48  
49  
50  
51  
52  
53  
54  
55  
56  
57  
58  
59  
60

593 reviews: an update. *Journal of multidisciplinary healthcare* 2018;11:495-510. doi:  
594 10.2147/jmdh.S155103 [published Online First: 2018/10/13]  
595 36. Loudon K, Treweek S, Sullivan F, et al. The PRECIS-2 tool: designing trials that are fit for  
596 purpose. *BMJ* 2015;350:h2147. doi: 10.1136/bmj.h2147 [published Online First:  
597 2015/05/10]

598

For peer review only

1  
2  
3 599  
4  
56 **600 Authors' contributions**

7 601 SH, BS, IB, MB, DM, and PR had the study idea and designed the study. SS, IP and AC  
8 602 provided expertise to ensure implementation at the journal level was possible. MMS was  
9 603 responsible for statistical aspects, including the sample size calculation and the data analysis  
10 604 plan. BS and SH wrote the first draft of the study protocol. All authors critically revised the  
11 605 protocol and approved the final version.  
12  
13  
14  
15

16 606

17  
18 607 **Funding statement:** Benjamin Speich is supported by an Advanced Postdoc.Mobility grant  
19 608 from the Swiss National Science Foundation (P300PB\_177933). David Moher is supported by  
20 609 a University Research Chair, University of Ottawa. Michael M Schlusser is funded by Cancer  
21 610 Research UK. The funders had no role in designing the study and will also have no role in  
22 611 conducting the study, or analysing and reporting study results.  
23  
24  
25  
26  
27  
28

29 612

30  
31  
32 613 **Competing interests statement**

33  
34 614 SS is employed by the British Medical Journal (BMJ). IP and AC are employed by the Public  
35 615 Library of Science (PLOS). DM, SH, and IB are members of the CONSORT executive and  
36 616 authors of the CONSORT 2010 Statement. DM and PR are members of the EQUATOR  
37 617 network steering group. MMS is a meta-researcher and reporting guideline developer,  
38 618 enthusiast, and disseminators, he may therefore overestimate the importance of this project.  
39 619 All authors have declared that no other competing interests exist.  
40  
41  
42  
43  
44  
45  
46

47 620

48  
49  
50 621 **Roles and responsibilities**

51  
52  
53 622 The principal investigator (BS) is responsible for the preparation and the revisions of the study  
54 623 protocol, organising meetings of the steering committee, recruiting and randomising eligible  
55 624 manuscripts as well as the publication of study reports. The steering committee (IB, MB, SH,  
56 625 DM, PR, BS, MMS, and SS) is responsible for revising the protocol, defining and validating the  
57  
58  
59  
60

1  
2  
3 626 additional short explanation for each CONSORT item, advising on study implementation, and  
4 627 for publishing the results of this study. MMS is responsible for the sample size calculation and  
5 628 the statistical analyses.  
6  
7

8 629 **Word count: 4408**

9 630

10 631  
11  
12  
13  
14  
15  
16  
17  
18  
19  
20  
21  
22  
23  
24  
25  
26  
27  
28  
29  
30  
31  
32  
33  
34  
35  
36  
37  
38  
39  
40  
41  
42  
43  
44  
45  
46  
47  
48  
49  
50  
51  
52  
53  
54  
55  
56  
57  
58  
59  
60

For peer review only

1  
2  
3 632 **Figure legend**

4  
5 633

6  
7 634 **Figure 1: Study flowchart**

8  
9 635

10  
11 636

12  
13  
14  
15  
16  
17  
18  
19  
20  
21  
22  
23  
24  
25  
26  
27  
28  
29  
30  
31  
32  
33  
34  
35  
36  
37  
38  
39  
40  
41  
42  
43  
44  
45  
46  
47  
48  
49  
50  
51  
52  
53  
54  
55  
56  
57  
58  
59  
60

For peer review only



1  
2  
3  
4  
5  
6  
7

**Table 1:** The ten most important and poorly reported CONSORT items as defined by a group of experts on the CONSORT statement.<sup>30</sup> For better understanding key features were summarised within a short explanation (extracted from the CONSORT explanation and elaboration paper<sup>11</sup> as well as from the COBWEB tool<sup>33</sup>).

| Item | Section                         | CONSORT item                                                                                                                                                                            | Short explanation                                                                                                                                                                                                                                                                                                                        |
|------|---------------------------------|-----------------------------------------------------------------------------------------------------------------------------------------------------------------------------------------|------------------------------------------------------------------------------------------------------------------------------------------------------------------------------------------------------------------------------------------------------------------------------------------------------------------------------------------|
| 1    | Outcomes (6a)                   | Completely defined pre-specified primary outcome measure, including how and when it was assessed                                                                                        | Is it clear (1) what the primary outcome is (usually the one used in the sample size calculation), (2) how it was measured (if relevant; e.g. which score used), (3) at what time point, and (4) what the analysis metric was (e.g. change from baseline, final value)?                                                                  |
| 2    | Sample size (7a)                | How sample size was determined                                                                                                                                                          | Is there a clear description of how the sample size was determined, including (1) the estimated outcomes in each group; (2) the $\alpha$ (type I) error level; (3) the statistical power (or the $\beta$ (type II) error level); and (4) for continuous outcomes, the standard deviation of the measurements?                            |
| 3    | Sequence generation (8a)        | Method used to generate random allocation sequence                                                                                                                                      | Does the description make it clear if the “assigned intervention is determined by a chance process and cannot be predicted”?                                                                                                                                                                                                             |
| 4    | Allocation concealment (9)      | Mechanism used to implement random allocation sequence (such as sequentially numbered containers), describing any steps taken to conceal the sequence until interventions were assigned | Is it clear how the care provider enrolling participants was made ignorant of the next assignment in the sequence (different from blinding)? Possible methods can rely on centralised or “third-party” assignment (i.e., use of a central telephone randomisation system, automated assignment system, sealed containers).               |
| 5    | Blinding (11a)                  | If done, who was blinded after assignment to interventions (for example, participants, care providers, those assessing outcomes)                                                        | Is it clear if (1) healthcare providers, (2) patients, and (3) outcome assessors are blinded to the intervention? General terms such as “double-blind” without further specifications should be avoided.                                                                                                                                 |
| 6    | Outcomes and estimation (17a/b) | For the primary outcome, results for each group, and the estimated effect size and its precision (such as 95% confidence intervals)                                                     | Is the estimated effect size and its precision (such as standard deviation or 95% confidence intervals) for each treatment arm reported? When the primary outcome is binary, both the relative effect (risk ratio, relative risk) or odds ratio) and the absolute effect (risk difference) should be reported with confidence intervals. |
| 7    | Harms (19)                      | All-important harms or unintended effects in each group                                                                                                                                 | Is the number of affected persons in each group, the severity grade (if relevant) and the absolute risk (e.g. frequency of incidence) reported? Are the number of serious, life threatening events and deaths reported? If no adverse event occurred this should be clearly stated.                                                      |
| 8    | Registration (23)               | Registration number and name of trial registry                                                                                                                                          | Is the registry and the registration number reported? If the trial was not registered, it should be explained why.                                                                                                                                                                                                                       |
| 9    | Protocol (24)                   | Where trial protocol can be accessed                                                                                                                                                    | Is it stated where the trial protocol can be assessed (e.g. published, supplementary file, repository, directly from author, confidential and therefore not available)?                                                                                                                                                                  |
| 10   | Funding (25)                    | Sources of funding and other support (such as supply of drugs) and role of funders                                                                                                      | Are (1) the funding sources, and (2) the role of the funder(s) described?                                                                                                                                                                                                                                                                |

37  
38  
39

40  
41  
42  
43  
44  
45  
46

642 **Table 2:** Study schedule

|                                                                                     | <b>Enrolment</b>                                  | <b>Allocation and intervention</b>                  | <b>Intervention</b>                                            | <b>Post-intervention</b>         |                              |
|-------------------------------------------------------------------------------------|---------------------------------------------------|-----------------------------------------------------|----------------------------------------------------------------|----------------------------------|------------------------------|
| Time-point                                                                          | <i>Studies which are sent out for peer-review</i> | <i>After first peer-reviewer accepts invitation</i> | <i>Whenever an additional peer-reviewer accepts invitation</i> | <i>First decision by journal</i> | <i>Published manuscripts</i> |
| Eligibility screen                                                                  | X                                                 |                                                     |                                                                |                                  |                              |
| Allocation                                                                          |                                                   | X                                                   |                                                                |                                  |                              |
| Intervention:                                                                       |                                                   |                                                     |                                                                |                                  |                              |
| C-short + usual care                                                                |                                                   | X                                                   | X                                                              |                                  |                              |
| Usual care                                                                          |                                                   | X                                                   | X                                                              |                                  |                              |
| Assessment of trial characteristics:                                                |                                                   |                                                     |                                                                |                                  |                              |
| Funding source                                                                      |                                                   |                                                     |                                                                |                                  | X                            |
| Study centres (single centre or multicentre)                                        |                                                   |                                                     |                                                                |                                  | X                            |
| Sample size                                                                         |                                                   |                                                     |                                                                |                                  | X                            |
| Study design (e.g. parallel arm, crossover)                                         |                                                   |                                                     |                                                                |                                  | X                            |
| Hypothesis (e.g. superiority, non-inferiority)                                      |                                                   |                                                     |                                                                |                                  | X                            |
| Medical field                                                                       |                                                   |                                                     |                                                                |                                  | X                            |
| Intervention tested                                                                 |                                                   |                                                     |                                                                |                                  | X                            |
| Number of trial arms                                                                |                                                   |                                                     |                                                                |                                  | X                            |
| Number of peer-reviewers                                                            |                                                   |                                                     |                                                                |                                  | X                            |
| Journal which published the manuscript                                              |                                                   |                                                     |                                                                |                                  | X                            |
| Number of journals requesting CONSORT adherence (submission of checklist mandatory) |                                                   |                                                     |                                                                |                                  | X                            |
| Assessment of outcomes:                                                             |                                                   |                                                     |                                                                |                                  |                              |
| Time from assigning an academic editor until the first decision                     |                                                   |                                                     |                                                                | X                                |                              |
| Proportion of manuscripts directly rejected after the first round of peer-review    |                                                   |                                                     |                                                                | X                                |                              |
| Proportion of manuscripts that will be published in the journal under study         |                                                   |                                                     |                                                                |                                  | X                            |
| Adherence to CONSORT items and sub-items                                            |                                                   |                                                     |                                                                |                                  | X                            |

643

644 **Table 3:** Assumptions for sample size calculations in two different scenarios.

| Item           | CONSORT item                  | Scenario 1. Adequate reporting as published in WebCONSORT <sup>30</sup> | Scenario 2. Adapted from Scenario 1 |
|----------------|-------------------------------|-------------------------------------------------------------------------|-------------------------------------|
| 1              | Outcomes (6a)                 | 77% (79 of 103)                                                         | 77% (79 of 103)                     |
| 2              | Sample size (7a)              | 83% (85 of 103)                                                         | 83% (85 of 103)                     |
| 3              | Sequence generation (8a)      | 76% (78 of 103)                                                         | 76% (78 of 103)                     |
| 4              | Allocation concealment (9)    | 55% (57 of 103)                                                         | 55% (57 of 103)                     |
| 5              | Blinding (11a)                | 35% (36 of 103)                                                         | 35% (36 of 103)                     |
| 6              | Outcomes and estimation (17a) | 44% (45 of 103)                                                         | 44% (45 of 103)                     |
| 7              | Harms (19)                    | 71% (73 of 103)                                                         | 71% (73 of 103)                     |
| 8              | Registration (23)             | 69% (71 of 103)                                                         | 90%                                 |
| 9              | Protocol (24)                 | 19% (20 of 103)                                                         | 90%                                 |
| 10             | Funding (25)                  | 34% (35 of 103)                                                         | 90%                                 |
| <b>Overall</b> |                               | <b>56%</b>                                                              | <b>71%</b>                          |

645 Abbreviation: CONSORT= CONSolidated Standards for Reporting Trials

646

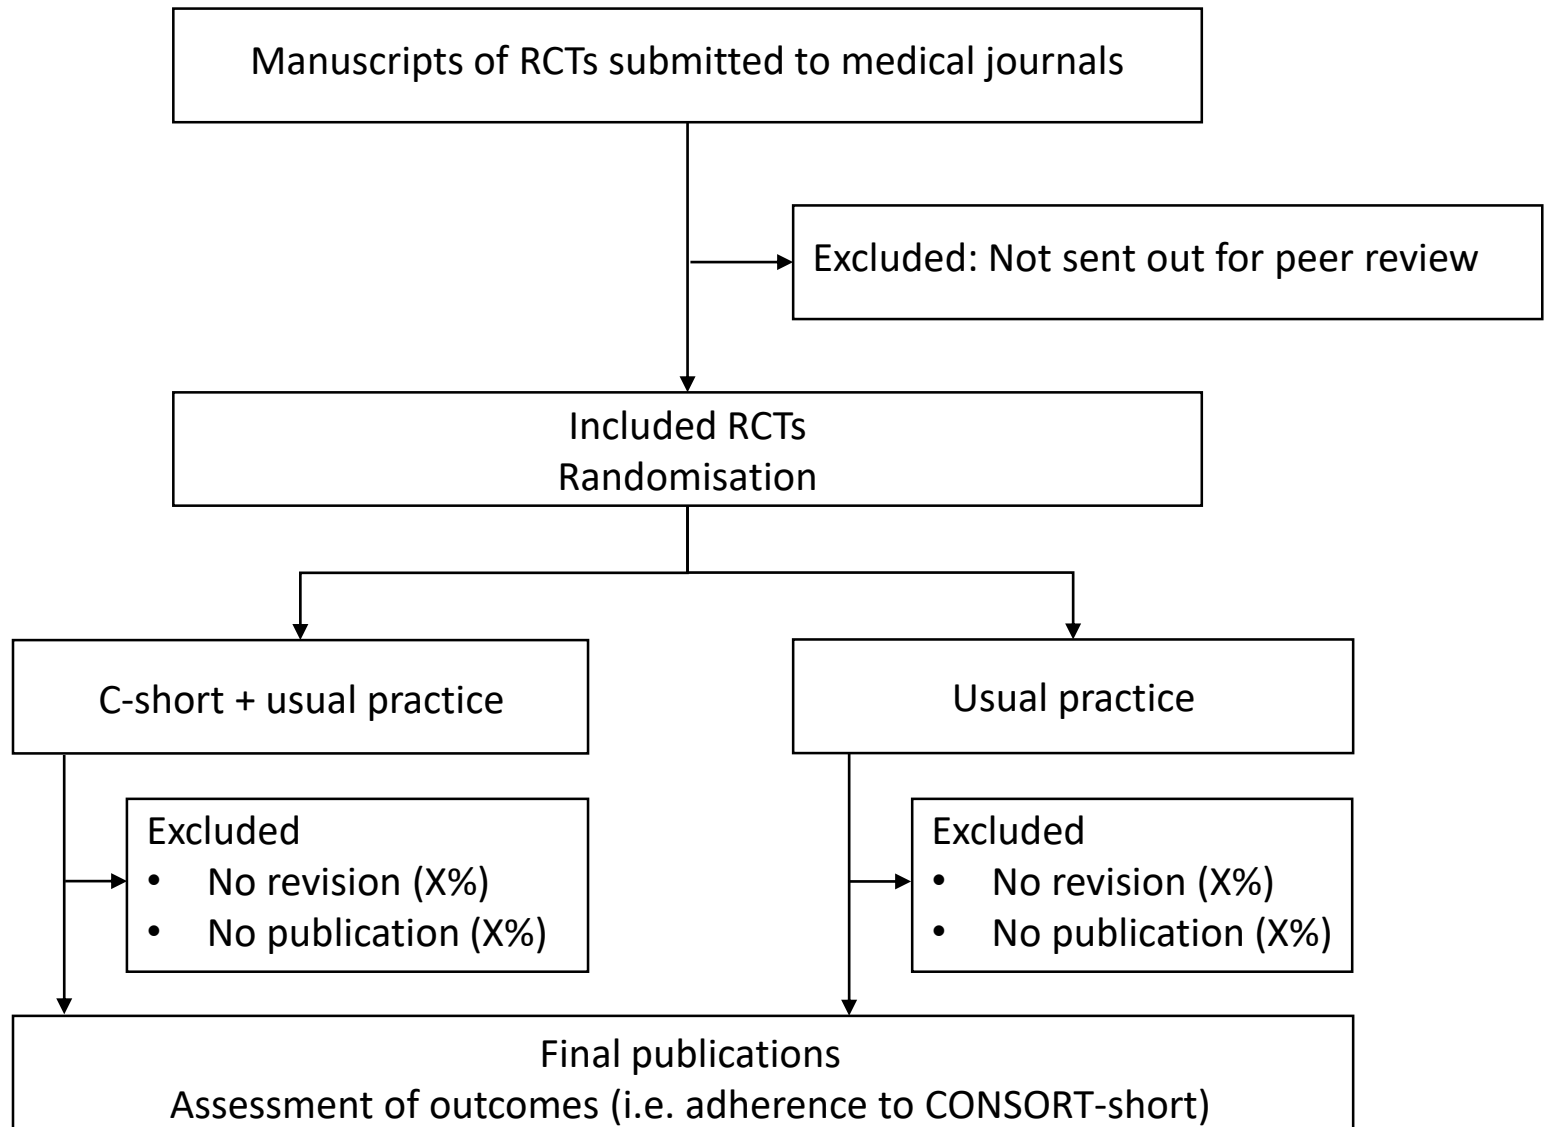

1  
2  
3 **Impact of a short version of the CONSORT checklist for peer reviewers to improve the**  
4 **reporting of randomised controlled trials published in biomedical journals: study**  
5 **protocol for a randomised controlled trial**  
6  
7  
8  
9

10 Benjamin Speich, Sara Schroter, Matthias Briel, David Moher, Iratxe Puebla, Alejandra Clark,  
11  
12 Michael M Schlusser, Philippe Ravaud, Isabelle Boutron, Sally Hopewell  
13  
14  
15  
16  
17  
18

19 **Appendix**  
20  
21  
22

23 **Appendix 1:** Example of the email which will be sent out in the intervention arm (C-Short).  
24 The exact wording might be slightly adapted according to the journal preferences.  
25

26 *Page 2*

27 **Appendix 2:** Original study protocol as it was approved by the Medical Sciences  
28 Interdivisional Research Ethics Committee of the University of Oxford (R62779/RE001).  
29

30 *Page 3*  
31

32 **Appendix 3:** WHO Trial Registration Data Set (Version 1.3.1)  
33

34 *Page 27*  
35  
36  
37  
38  
39  
40  
41  
42  
43  
44  
45  
46  
47  
48  
49  
50  
51  
52  
53  
54  
55  
56  
57  
58  
59  
60

**Appendix 1:** Example of the email which will be sent out in the intervention arm (C-Short).  
The exact wording might be slightly adapted according to the journal preferences.

Dear *\*Title, Name\**,

We thank you for accepting to peer-review a manuscript for *\*journal name\**. As we are trying to improve the reporting for randomised controlled trials according to the CONSORT guidelines, we would like to ask if you could check whether the following most important and poorly reported items are adequately implemented as indicated in the *table below/attached table*.

| Item | Section                         | CONSORT item                                                                                                                                                                            | Short explanation                                                                                                                                                                                                                                                                                                                        |
|------|---------------------------------|-----------------------------------------------------------------------------------------------------------------------------------------------------------------------------------------|------------------------------------------------------------------------------------------------------------------------------------------------------------------------------------------------------------------------------------------------------------------------------------------------------------------------------------------|
| 1    | Outcomes (6a)                   | Completely defined pre-specified primary outcome measure, including how and when they were assessed                                                                                     | Is it clear (1) what the primary outcome is (usually the one used in the sample size calculation), (2) how it was measured (if relevant; e.g. which score used), (3) at what time point, and (4) what the analysis metric was (e.g. change from baseline, final value)?                                                                  |
| 2    | Sample size (7a)                | How sample size was determined                                                                                                                                                          | Is there a clear description of how the sample size was determined, including (1) the estimated outcomes in each group; (2) the $\alpha$ (type I) error level; (3) the statistical power (or the $\beta$ (type II) error level); and (4) for continuous outcomes, the standard deviation of the measurements?                            |
| 3    | Sequence generation (8a)        | Method used to generate random allocation sequence                                                                                                                                      | Does the description make it clear if the "assigned intervention is determined by a chance process and cannot be predicted"?                                                                                                                                                                                                             |
| 4    | Allocation concealment (9)      | Mechanism used to implement random allocation sequence (such as sequentially numbered containers), describing any steps taken to conceal the sequence until interventions were assigned | Is it clear how the care provider enrolling participants was made ignorant of the next assignment in the sequence (different from blinding)? Possible methods can rely on centralised or "third-party" assignment (i.e., use of a central telephone randomisation system, automated assignment system, sealed containers).               |
| 5    | Blinding (11a)                  | If done, who was blinded after assignment to interventions (for example, participants, care providers, those assessing outcomes)                                                        | Is it clear if (1) healthcare providers, (2) patients, and (3) outcome assessors are blinded to the intervention? General terms such as "double-blind" without further specifications should be avoided.                                                                                                                                 |
| 6    | Outcomes and estimation (17a/b) | For the primary outcome, results for each group, and the estimated effect size and its precision (such as 95% confidence intervals)                                                     | Is the estimated effect size and its precision (such as standard deviation or 95% confidence intervals) for each treatment arm reported? When the primary outcome is binary, both the relative effect (risk ratio, relative risk) or odds ratio) and the absolute effect (risk difference) should be reported with confidence intervals. |
| 7    | Harms (19)                      | All-important harms or unintended effects in each group                                                                                                                                 | Is the number of affected persons in each group, the severity grade (if relevant) and the absolute risk (e.g. frequency of incidence) reported? Are the number of serious, life threatening events and deaths reported? If no adverse event occurred this should be clearly stated.                                                      |
| 8    | Registration (23)               | Registration number and name of trial registry                                                                                                                                          | Is the registry and the registration number reported? If the trial was not registered, it should be explained why.                                                                                                                                                                                                                       |
| 9    | Protocol (24)                   | Where trial protocol can be accessed                                                                                                                                                    | Is it stated where the trial protocol can be assessed (e.g. published, supplementary file, repository, directly from author, confidential and therefore not available)?                                                                                                                                                                  |
| 10   | Funding (25)                    | Sources of funding and other support (such as supply of drugs) and role of funders                                                                                                      | Are (1) the funding sources, and (2) the role of funder(s) described?                                                                                                                                                                                                                                                                    |

Your efforts are highly appreciated.

Kind regards,

*\*journal name\**-Team

**Appendix 2:** Original study protocol as it was approved by the Medical Sciences Interdivisional Research Ethics Committee of the University of Oxford (R62779/RE001).

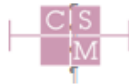

CENTRE for STATISTICS in MEDICINE



**Impact of a short form of the CONSORT checklist for peer reviewers to improve the reporting of randomised controlled trials published in biomedical journals: a randomised controlled trial**

**Short title: CONSORT for Peer Review (CONSORT-PR)**

Principal investigator: Dr Benjamin Speich  
Centre for Statistics in Medicine, University of Oxford

Dr Benjamin Speich  
Centre for Statistics in Medicine,  
Botnar Research Centre, University of Oxford, Windmill Road, Oxford OX3 7LD  
Email: Benjamin.speich@ndorms.ox.ac.uk

**SCIENTIFIC COMMITTEE**

Prof Isabelle Boutron, Paris Descartes University, France  
Prof Matthias Briel, University of Basel, Switzerland  
Associate Prof Sally Hopewell, Centre for Statistics in Medicine, Oxford University, UK  
Prof David Moher, Centre for Journalology, Clinical Epidemiology Program, Ottawa Hospital  
Research Institute, Canada  
Prof Philippe Ravaud, Paris Descartes University, France  
Dr Benjamin Speich, Centre for Statistics in Medicine, University of Oxford, UK  
Dr. Michael M Schlüssel, Centre for Statistics in Medicine, University of Oxford, UK

Dr Sara Schroter, The BMJ, London, UK

**Trial registration:** This trial will be prospectively registered under [clinicaltrials.gov](http://clinicaltrials.gov).

**Protocol version:** Version 1.1 2019-05-21

**Funding:** Benjamin Speich is supported by an Advanced Postdoc.Mobility grant from the Swiss National Science Foundation (P300PB\_177933). David Moher is supported by a University Research Chair, Ottawa. The funders had no role in designing the study and will also have no role in conducting the study as well as in analysing and reporting study results.

**Roles and responsibilities:**

Contributors: SH, BS, IB, MB, DM, PR, had the study idea and designed the study. SS provided expertise to ensure implementation at the journal level was possible. MMS was responsible for statistical aspects, including the sample size calculation and the data analysis plan. BS and SH wrote the first draft of the study protocol. All authors critically revised the protocol and approved the final version.

Sponsor and contact information: Centre for Statistics in Medicine, Botnar Research Centre, University of Oxford, Windmill Road, Oxford OX3 7LD. Principal investigator: Benjamin Speich (Email: [Benjamin.speich@ndorms.ox.ac.uk](mailto:Benjamin.speich@ndorms.ox.ac.uk))

Sponsor and funders: The funders had no role in designing the study and will also have no role in conducting the study as well as in analysing and reporting study results.

Roles and responsibilities: The principal investigator (BS) is responsible for the preparation and the revisions of the study protocol, organising meetings of the steering committee, recruiting and randomizing eligible manuscripts as well as the publication of study reports. The steering committee (IB, MB, SH, DM, PR, BS, MMS, and SS) is in charge of participating in the elaboration of the protocol, defining and validating the additional short explanation for each CONSORT item, following the evolution of the committed study and for publishing the results of this study. MMS is responsible for the sample size calculation and the statistical analyses.



**Table of content:**

|                                                                                           |    |
|-------------------------------------------------------------------------------------------|----|
| <b>1. BACKGROUND AND RATIONAL</b> .....                                                   | 6  |
| 1.1 Need for clinical research and epidemiologic transparency .....                       | 6  |
| 1.2 Transparency in published randomised controlled trials .....                          | 6  |
| 1.3 Journal attempts to improve reporting in published randomised controlled trials ..... | 7  |
| <b>2. HYPOTHESIS</b> .....                                                                | 8  |
| <b>3. OBJECTIVE</b> .....                                                                 | 8  |
| 3.1 Main objective .....                                                                  | 8  |
| <b>4. METHODS</b> .....                                                                   | 9  |
| 4.1 Trial design .....                                                                    | 9  |
| 4.2 Study setting and eligibility criteria .....                                          | 9  |
| 4.3 Interventions .....                                                                   | 10 |
| 4.4 Outcomes .....                                                                        | 13 |
| 4.5 Participant timeline.....                                                             | 14 |
| 4.6. Sample size .....                                                                    | 16 |
| 4.7 Randomisation and blinding .....                                                      | 17 |
| 4.8 Statistical methods.....                                                              | 18 |
| 4.8.1 Populations of analysis .....                                                       | 18 |
| 4.8.2 Data analysis.....                                                                  | 19 |
| 4.8.3 Analysis of primary endpoint.....                                                   | 19 |
| 4.8.4 Analysis of secondary endpoints .....                                               | 19 |
| <b>5 LEGAL AND GENERAL LOGISTICS</b> .....                                                | 20 |
| 5.1. Organisation of study .....                                                          | 20 |
| 5.1.1 Coordinating centre .....                                                           | 20 |
| 5.1.2 Scientific committee.....                                                           | 20 |
| 5.2. Regulatory aspects .....                                                             | 21 |
| <b>6 PUBLICATION POLICY AND ACCESS TO DATA</b> .....                                      | 22 |
| <b>REFERENCES</b> .....                                                                   | 23 |
| <b>APPENDIX</b> .....                                                                     | 26 |

## 1. Background and rational

### 1.1 Need for clinical research and epidemiologic transparency

There is substantial agreement that well conducted and reported randomised controlled trials (RCTs) generate the most trustworthy evidence when newly developed or already existing clinical interventions are evaluated (1-3). Besides the complexity and the high associated costs of conducting RCTs (4-6), there are major issues with their reporting that often make it difficult for researchers, clinicians, patients or policymakers to interpret the current evidence on a specific topic (7, 8). Chronologically, the most prominent difficulties in reporting consist of (i) poor reporting in study protocols for RCTs (9-12); (ii) a substantial fraction of trials are not registered, prematurely discontinued (most common due to difficulties with recruitment) and not published (13, 14); and (iii) that published RCTs are often poorly reported (7).

For clinicians, scientists and decision makers, published articles are often the only way to know how a study was conducted. In order to judge the internal and external validity of RCTs, it is crucial that these articles present transparent, accurate and unbiased information about the methods and conduct of the RCT.

### 1.2 Transparency in published randomised controlled trials

To improve the transparency in clinical and epidemiological research the international organisation called the EQUATOR (Enhancing the Quality and Transparency of Research) Network was founded in 2006 (15-20). This international network consists of researchers, epidemiologists, people in charge of recommendations for the presentation of articles or "reporting guidelines", statisticians, clinicians and editors from some of the most prestigious journals (e.g., *Lancet*, *JAMA*, *Annals of Internal Medicine*, *BMJ*).

The CONSORT Statement (CONsolidated Standards for Reporting Trials), is perhaps the most important reporting guideline designed to help improve the transparency and quality of reporting of RCTs (21, 22). The CONSORT Statement, consisting of 25 items and a flow diagram which should be reported in papers describing RCTs. The last update of the CONSORT Statement was published simultaneously in 10 leading medical journals in 2010 (23). Currently CONSORT is endorsed by 585 journals (24). The CONSORT Statement guides authors, peer reviewers and journal editors on what information should be included in published reports of RCTs in order to facilitate critical judgment and interpretation of results. It is important to note, that adhering to the CONSORT Statement does not mean that the study is of high quality. However, reporting all items from the CONSORT list will enable readers to adequately judge the quality of RCTs.

1  
2  
3 A number of research studies have identified serious limitations in the reporting of published  
4 RCTs (3, 25-30). Despite some improvement in reporting following the implementation of the  
5 CONSORT Statement, there still remain major reporting deficiencies in published RCTs (31).  
6 For example, Odutayo and colleagues showed that a large proportion of RCTs published in  
7 December 2012 in PubMed did not define the primary outcome (31%), did not state the sample  
8 size calculation (45%) and did not explain the method of allocation concealment (50%) (32).  
9 This lack of transparency is a major limiting factor for the reader who assesses an article in  
10 order to find the answer to a specific question; it is also a major problem for scientists who  
11 perform systematic reviews and meta-analyses. Thus, some published trials may not be  
12 included in the meta-analysis because of their lack of transparency. Chan showed (25, 33) that  
13 50% of efficacy outcomes and 65% of safety outcomes could not be included in meta-analyses  
14 because of how they were reported. Furthermore, even if these trials are included in systematic  
15 reviews and meta-analyses, an adequate risk of bias assessment is often not possible due to  
16 the poor reporting quality. Nevertheless, the main consequence of the lack of transparency is  
17 the risk of accepting treatments that are ineffective or cause serious adverse events (34).  
18  
19  
20  
21  
22  
23  
24  
25  
26  
27

### 28 1.3 Journal attempts to improve reporting in published randomised controlled trials

29  
30 Journals can play a vital role in improving the reporting of published reports of RCTs. For  
31 example, a survey of authors' instructions on journal websites revealed that in 2014 63% (106  
32 of 168) of biomedical journals mentioned CONSORT within their "Instructions to Authors" (35).  
33 Of those journals 38 (36%) required a CONSORT checklist as a condition of RCT report  
34 submission. Such implementation indicates some improvement over time compared to an  
35 assessment in 2007 when only 17 journals requested the CONSORT checklist (36). An  
36 interrupted time series analysis which assessed if the CONSORT for Abstracts guideline had  
37 an effect on the reporting quality, found that results are better reported in Journals which  
38 enforce the policy (37).  
39  
40  
41  
42  
43  
44  
45

46 In a study published in 2016 authors of RCTs were asked by journal editors to use the web-  
47 based CONSORT tool at the manuscript revision stage (38). Authors who were randomly  
48 allocated to the intervention had access to a tool which allowed them to combine different  
49 CONSORT extensions (according to study design, medical field) to generate customised  
50 checklists. In the control group, authors had access to a CONSORT flow diagram generator.  
51 The goal was to improve the reporting of CONSORT items with a simple webtool. However, a  
52 quarter of all authors either wrongly selected a CONSORT extension or failed to select an  
53 extension, indicating that further education is needed in terms of when and how to implement  
54 CONSORT extensions.  
55  
56  
57  
58  
59  
60

1  
2  
3 A systematic scoping review conducted in 2017 by Blanco and colleagues summarised  
4 different interventions aimed to improve adherence to reporting guidelines (39) (manuscript  
5 with results currently under review. Draft received via personal communication). A number of  
6 different interventions were identified and some had also been tested at journals. However,  
7 the interventions, besides requesting submission of checklists from authors, required  
8 additional resources at the journal level (e.g. internal peer review by editorial assistants or  
9 inviting an additional statistical peer-reviewer (40, 41)). Therefore, it is unlikely that these  
10 interventions will be implemented in the vast majority of journals, especially not in smaller  
11 journals with limited resources. A study examining “the nature and extent of changes made to  
12 manuscripts after peer review, in relation to the reporting of methodological aspects of RCTs”  
13 and “the type of changes requested by peer reviewers” found that peer review did lead to some  
14 improvement in reporting (40).

15  
16 Building on these findings we plan to evaluate the impact of inviting peer reviewers to explicitly  
17 use a short version of the CONSORT checklist (including a short explanation of those items)  
18 as part of their review process. If this intervention deems to be effective, it could be easily  
19 implemented by all medical journals without needing additional resources at a journal level.

## 2. Hypothesis

20  
21 We propose an RCT to evaluate the impact of asking peer reviewers to use a short version of  
22 the CONSORT checklist when reviewing a manuscript of an RCT and whether it improves the  
23 completeness of reporting. Our hypothesis is that reminding peer reviewers of the CONSORT  
24 items (including a short explanation of those items) will result in higher adherence to  
25 CONSORT guidelines in published RCTs. We only selected a limited number of the CONSORT  
26 items because we did not want to deter peer reviewers with too much information. Since peer  
27 reviewing in general can be burdensome, we felt that this approach is more promising than  
28 listing all items, risking that the information will be ignored. The short version of the CONSORT  
29 checklist is based on the same items described in a previous study as the 10 most important  
30 and underreported CONSORT items (38).

## 3. Objective

### 3.1 Main objective

31  
32 The main objective of this study is to evaluate the impact of asking peer reviewers during the  
33 standard peer-review process to ask them to use a short version of the CONSORT checklist  
34 (C-short) and whether it will improve the reporting in published RCTs compared to manuscripts  
35 where the peer reviewers underwent usual practice.

## 4. Methods

### 4.1 Trial design

This study is a multicentre RCT with articles being the unit of randomisation (Figure 1; allocation ratio 1:1). A multicentre parallel arm RCT with randomisation at the individual article level was chosen instead of a cluster RCT because the risk of any “contamination” on journal level is not given as the intervention will be implemented by an external researcher (i.e. BS). The possibility of contamination due to the possibility that peer reviewer are invited to assess several RCTs and are randomised into both arms was judged as relatively small and therefore we do not plan to adjust for clustering by journal. The journal staff (i.e. editors) will not be actively told which manuscript was allocated to the proposed intervention and which to the control group.

**Figure 1:** Study flowchart



### 4.2 Study setting and eligibility criteria

The population will be defined on two levels. Included journals and included articles.

Included journals must: i) endorse the CONSORT Statement (e.g. assessed via journals Instruction to Authors); ii) publish primary results of at least five RCTs in 2017 (identified in a brief PubMed search as publishing RCTs in 2017). To be efficient, we plan to contact (via

1  
2  
3 email) the editors of eligible journals within a publishing house (i.e. journals which are part of  
4 the BMJ series, BMC series, PLoS, Lancet, JAMA) instead of separate journals. A description  
5 of the requirements for participation and a short summary information sheet will be included  
6 as part of the email invitation sent to journal editors. If a journal is eligible, and agrees to take  
7 part, the journal will also need to provide access to their journal editorial system (e.g.  
8 ScholarOne, Editorial Manager) to enable the external researcher (i.e. BS) to screen and  
9 randomise eligible manuscripts. In cases this is not possible, we will explore with separate  
10 journals if it would be possible to grant limited access (e.g. only rights to screen studies) and  
11 that the emails from the intervention would be sent by a person from the editorial team.  
12  
13  
14  
15  
16  
17  
18

19 We will include all submitted manuscripts reporting RCTs for which the journal decides to send out for  
20 external peer review. Since the 10 chosen CONSORT checklist items are applicable to different study  
21 designs, we will include all RCTs regardless of study design (e.g. parallel group trial, cluster trial,  
22 superiority trial, non-inferiority trial). Articles presenting clearly secondary trial results, additional time  
23 points, economic analyses, or any other analyses derived from an RCT dataset not including the study's  
24 main results will be excluded. Furthermore, RCTs which are clearly labelled as a pilot or feasibility study  
25 or randomise animals or cells instead of individuals will be excluded.  
26  
27  
28  
29

30 Details of journal manuscript submission and peer review processes, including, consent and  
31 potential confidentiality issues will be discussed in detail with each journal by teleconference  
32 and/or face to face prior to the journal agreeing to take part to ensure that randomisation of  
33 manuscripts is feasible. We considered conducting randomisation at the level of the journal  
34 (i.e. cluster RCTs). However, in order to make the intervention as easy and simple to  
35 implement (and with little or no additional effort from the journal) we believe that randomisation  
36 at the manuscript level - with an external researcher implementing the intervention within the  
37 existing journal management systems - will be the most efficient study design.  
38  
39  
40  
41  
42  
43  
44

45 In participating journals, the external investigator (BS) will have access to the editorial  
46 management software (e.g. ScholarOne or Editorial Manager) and will check at least twice a  
47 week (using automated report lists) all research manuscripts that are sent out for external peer  
48 review. As soon as the first peer-reviewer accepts the invitation to review, the manuscript will  
49 be randomised to the intervention or control arm (see "Randomisation" for more details). It is  
50 possible that this process might be slightly different amongst different included journals.  
51  
52  
53  
54  
55

#### 56 4.3 Interventions

57  
58  
59 Experimental group: C-short plus usual practice  
60

1  
2  
3 After accepting to review an article, peer reviewers will receive the automated, journal specific  
4 standard email with general information as per each journal's usual practice (e.g. where to  
5 access the manuscript, date when the peer review report is due). In addition, peer-reviewers  
6 who received a manuscript which was randomised to C-short will receive an additional email  
7 including a short version of the CONSORT checklist (C-short) (either within the email or as  
8 an attachment; based on the preferences and possibilities of the journal) focusing on the 10  
9 most important and most poorly reported items (Table 1; as previously defined by a group of  
10 experts of the CONSORT Group (38)). Peer-reviewers will be asked to pay particular attention  
11 to items in the C-short checklist and request authors to report on these items, if not already  
12 adequately reported. This second email, containing the C-short checklist, is not generated  
13 automatically within the existing journal editorial management system (e.g. ScholarOne or  
14 Editorial Manager); it will be sent by the investigator who has access to the journal editorial  
15 system (BS). An example of this additional email is presented within the appendix (appendix  
16 1; the exact wording might be changed according to the preferences of the participating  
17 journals). At least twice a week the editorial management system will be checked for each  
18 journal and if a peer reviewer has accepted an invitation to review, an email containing the C-  
19 short intervention will be generated and sent. It might be possible that some journals will only  
20 provide the right to access and read manuscripts in the editorial management system, but not  
21 to send emails. If this is the case, the corresponding Editor (or designated person within the  
22 journal) will be informed to send the emails.  
23  
24  
25  
26  
27  
28  
29  
30  
31  
32  
33  
34  
35

#### Development and testing of the short explanation of the C-short items:

36 We chose the 10 most important and poorly reported CONSORT items as identified by a group  
37 of CONSORT experts in a previous study conducted by Hopewell and colleagues (38). The  
38 selection of the items was based on expert opinion and empirical evidence whenever available  
39 (38). In addition, we have added a short explanation for each of the 10 items. These short  
40 explanations were extracted and amended from the CONSORT explanation and elaboration  
41 paper (21) and from COBWEB which is online writing aid tool (42). The short explanation was  
42 discussed and adapted by the scientific committee.  
43  
44  
45  
46  
47  
48  
49

#### Control group: Usual practice:

50 After accepting to review an article, peer reviewers will receive the automated, journal specific  
51 standard email with general information as per each journal's usual practice (e.g. where to  
52 access the manuscript, date until when the peer review report is due). However, they will not  
53 receive the second email, sent by the investigator who has access to the journal editorial  
54 system (BS) which contains the C-short checklist.  
55  
56  
57  
58  
59  
60



**Table 1:** The ten most important and poorly reported CONSORT items as defined by a group of experts on the CONSORT statement (38). For better understanding key features were summarised within a short explanation (extracted from the CONSORT explanation and elaboration paper (21) as well as from the COBWEB tool (42)).

| Item | Section                         | CONSORT item                                                                                                                                                                            | Short explanation                                                                                                                                                                                                                                                                                                                        |
|------|---------------------------------|-----------------------------------------------------------------------------------------------------------------------------------------------------------------------------------------|------------------------------------------------------------------------------------------------------------------------------------------------------------------------------------------------------------------------------------------------------------------------------------------------------------------------------------------|
| 1    | Outcomes (6a)                   | Completely defined pre-specified primary outcome measure, including how and when they were assessed                                                                                     | Is it clear (1) what the primary outcome is (usually the one used in the sample size calculation), (2) how it was measured (if relevant; e.g. which score used), (3) at what time point, and (4) what the analysis metric was (e.g. change from baseline, final value)?                                                                  |
| 2    | Sample size (7a)                | How sample size was determined                                                                                                                                                          | Is there a clear description of how the sample size was determined, including (1) the estimated outcomes in each group; (2) the $\alpha$ (type I) error level; (3) the statistical power (or the $\beta$ (type II) error level); and (4) for continuous outcomes, the standard deviation of the measurements?                            |
| 3    | Sequence generation (8a)        | Method used to generate random allocation sequence                                                                                                                                      | Does the description make it clear if the “assigned intervention is determined by a chance process and cannot be predicted”?                                                                                                                                                                                                             |
| 4    | Allocation concealment (9)      | Mechanism used to implement random allocation sequence (such as sequentially numbered containers), describing any steps taken to conceal the sequence until interventions were assigned | Is it clear how the care provider enrolling participants was made ignorant of the next assignment in the sequence (different from blinding)? Possible methods can rely on centralised or “third-party” assignment (i.e., use of a central telephone randomisation system, automated assignment system, sealed containers).               |
| 5    | Blinding (11a)                  | If done, who was blinded after assignment to interventions (for example, participants, care providers, those assessing outcomes)                                                        | Is it clear if (1) healthcare providers, (2) patients, and (3) outcome assessors are blinded to the intervention? General terms such as “double-blind” without further specifications should be avoided.                                                                                                                                 |
| 6    | Outcomes and estimation (17a/b) | For the primary outcome, results for each group, and the estimated effect size and its precision (such as 95% confidence intervals)                                                     | Is the estimated effect size and its precision (such as standard deviation or 95% confidence intervals) for each treatment arm reported? When the primary outcome is binary, both the relative effect (risk ratio, relative risk) or odds ratio) and the absolute effect (risk difference) should be reported with confidence intervals. |
| 7    | Harms (19)                      | All-important harms or unintended effects in each group                                                                                                                                 | Is the number of affected persons in each group, the severity grade (if relevant) and the absolute risk (e.g. frequency of incidence) reported? Are the number of serious, life threatening events and deaths reported? If no adverse event occurred this should be clearly stated.                                                      |
| 8    | Registration (23)               | Registration number and name of trial registry                                                                                                                                          | Is the registry and the registration number reported? If the trial was not registered, it should be explained why.                                                                                                                                                                                                                       |
| 9    | Protocol (24)                   | Where trial protocol can be accessed                                                                                                                                                    | Is it stated where the trial protocol can be assessed (e.g. published, supplementary file, repository, directly from author, confidential and therefore not available)?                                                                                                                                                                  |
| 10   | Funding (25)                    | Sources of funding and other support (such as supply of drugs) and role of funders                                                                                                      | Are (1) the funding sources, and (2) the role of the funder(s) described?                                                                                                                                                                                                                                                                |



#### 4.4 Outcomes

##### Primary outcome:

The primary outcome of this study will be the difference of the mean proportion of adequately reported items of the 10 most important and poorly reported CONSORT items between the two intervention arms.

##### Secondary outcomes:

Secondary outcomes will include the following:

- Mean proportion of adequate reporting of the 10 most important and poorly reported CONSORT items, considering each sub-item (see also “Assessment of outcomes”) as a separate item.
- Mean proportion for each of the 10 most important and poorly reported CONSORT items separately (including also separate analysis of sub-items).
- Time from assigning an academic editor until the first decision (as communicated to the author after the first round of peer-review).
- Proportion of articles directly rejected after the first round of peer-review.
- Proportion of articles published.

##### Additional outcomes:

For journals where peer reviewer comments are subsequently published alongside the published article, we will examine the peer reviewer comments for any reference to CONSORT and trial reporting. We will contact those journals which do not make peer reviewer comments publicly available, to see if they still could be used for such an analyses under the condition that only anonymised data will be published.

##### Data collection methods:

The outcomes will be assessed independently by two (blinded or at least partially blinded; see “blinding”) outcome assessors with expertise in the design and reporting of clinical trials. Any disagreement will be resolved by consensus or if necessary by consulting a third assessor. To ensure consistency between reviewers, we will first pilot the data extraction form; any disparities in the interpretation will be discussed and the data extraction form will be modified accordingly.

Adequate reporting of items will be assessed from published full-text publications adhering to the CONSORT C-short checklist (21). The following included items have sub-items which will be extracted separately:

- Outcomes (item 6a): (i) Define primary outcome, (ii) how it was measured, (iii) at what time point, and (iv) the analysis metric (e.g. change from baseline, final value).
- Sample size (item 7a): (i) The estimated outcomes in each group, (ii) the  $\alpha$  (type I) error level, (iii) the statistical power (or the  $\beta$  (type II) error level), (iv) for continuous outcomes, the standard deviation of the measurements
- Blinding (item 11a): Is the blinding status clear for the following persons: (i) Healthcare provider, (ii) patients, and (iii) outcome assessors.
- Funding (item 25): (i) The funding source, and (ii) the role of funder in the design, conduct, analysis, and reporting.

All items will be judged as either “yes” meaning adequately reported, “no” meaning not adequately reported, or “NA” meaning that this sub-item is not applicable for this RCT. Items with different sub-items will only be judged as adequately reported if all relevant sub-items were adequately reported.

- Time from assigning an academic editor until the first decision: The day when the academic editor was assigned and the day of the first decision (e.g. major revision, minor revision, rejected) will be extracted to calculate the number of days until the first decision.
- Proportion of articles directly rejected after the first round of peer-review: Articles which were not invited for re-submission will be labelled and counted.
- Proportion of articles published: Articles which will be published will be counted and collected for data extraction.

The outcomes “time from assigning an academic editor until the first decision”, “proportion of articles directly rejected after the first round of peer-review”, and “proportion of articles published” will be extracted directly from editorial management software of the journal.

#### 4.5 Participant timeline

The overview of the study schedule, including enrolment, intervention and assessments is presented in Table 2.

Table 2: Study schedule

|                                                                                     | Enrolment                                         | Allocation and intervention                         | Intervention                                                   | Post-intervention                |                              |
|-------------------------------------------------------------------------------------|---------------------------------------------------|-----------------------------------------------------|----------------------------------------------------------------|----------------------------------|------------------------------|
| Time-point                                                                          | <i>Studies which are sent out for peer-review</i> | <i>After first peer-reviewer accepts invitation</i> | <i>Whenever an additional peer-reviewer accepts invitation</i> | <i>First decision by journal</i> | <i>Published manuscripts</i> |
| Eligibility screen                                                                  | X                                                 |                                                     |                                                                |                                  |                              |
| Allocation                                                                          |                                                   | X                                                   |                                                                |                                  |                              |
| Intervention:                                                                       |                                                   |                                                     |                                                                |                                  |                              |
| C-short + usual care                                                                |                                                   | X                                                   | X                                                              |                                  |                              |
| Usual care                                                                          |                                                   | X                                                   | X                                                              |                                  |                              |
| Assessment of trial characteristics:                                                |                                                   |                                                     |                                                                |                                  |                              |
| Funding source                                                                      |                                                   |                                                     |                                                                |                                  | X                            |
| Study centres (single centre or multicentre)                                        |                                                   |                                                     |                                                                |                                  | X                            |
| Sample size                                                                         |                                                   |                                                     |                                                                |                                  | X                            |
| Study design (e.g. parallel arm, crossover)                                         |                                                   |                                                     |                                                                |                                  | X                            |
| Hypothesis (e.g. superiority, non-inferiority)                                      |                                                   |                                                     |                                                                |                                  | X                            |
| Medical field                                                                       |                                                   |                                                     |                                                                |                                  | X                            |
| Intervention tested                                                                 |                                                   |                                                     |                                                                |                                  | X                            |
| Number of trial arms                                                                |                                                   |                                                     |                                                                |                                  | X                            |
| Number of peer-reviewers                                                            |                                                   |                                                     |                                                                |                                  | X                            |
| Journal which published the manuscript                                              |                                                   |                                                     |                                                                |                                  | X                            |
| Number of journals requesting CONSORT adherence (submission of checklist mandatory) |                                                   |                                                     |                                                                |                                  | X                            |
| Assessment of outcomes:                                                             |                                                   |                                                     |                                                                |                                  |                              |
| Time from assigning an academic editor until the first decision                     |                                                   |                                                     |                                                                | X                                |                              |
| Proportion of articles directly rejected after the first round of peer-review       |                                                   |                                                     |                                                                | X                                |                              |
| Proportion of articles published                                                    |                                                   |                                                     |                                                                |                                  | X                            |
| Adherence to CONSORT items and sub-items                                            |                                                   |                                                     |                                                                |                                  | X                            |

#### 4.6. Sample size

For the sample size calculation we hypothesise in a first scenario (Table 3) that the intervention C-Short will result in a 25% relative increase in adequate reporting compared to the control (meaning that 70% of items will be adequately reported in the intervention group and 56% in the control group). This is based on the rate of reporting of the 10 most important and poorly reported items was 0.56 (meaning that a mean of 56% of the 10 most important and poorly reported items were reported) in the control group of a previous study called WebCONSORT (38). The standard deviation (SD) in the same study was 0.23. However, we calculated our sample size to account for a slightly bigger variability in our data (SD = 0.25). To demonstrate a significant difference with a power of 90% and a type 1 error at 5% a total of 136 articles will be required in this scenario (68 per treatment arm; based on a two sided t-test).

The staff from one journal which will most likely be included (i.e. *PLoS One*) pointed out that 3 out of the 10 assessed items (i.e. item “Registration”, “Protocol”, and “Funding”) should always be implemented given their template. Assuming that this journal will recruit a high proportion, and that also other journals might update their templates, we increased the sample size in a second scenario, in which all these 3 items would have an overall adherence of 90% in the control arm (Table 3). This would entail an overall baseline adherence with the 10 CONSORT-short items of 71%. Based on a two sided t-test, a sample size of 166 (83 per treatment arm) will have a power of 80% to find a 15% relative increase (71% adherence in control group; 82% adherence in intervention group; SD = 0.25; a type 1 error at 5%).

Since the final sample size will be based on the number of articles published, rather than on the number of manuscripts randomised, eligible RCTs will be included and randomised until the number of 83 published RCTs is reached in each arm (resulting in no less than 166 articles), to avoid loss of power due to potential imbalance between arms. Recruitment will be stopped as soon as both arms reach the sample size of 83. After recruitment stop we will wait three month so that manuscripts which are still in production can be published. Manuscripts which are published after the three month period will be excluded.

**Table 3:** Assumptions for sample size calculations in two different scenarios.

| Item           | CONSORT item                  | Scenario 1. Adequate reporting as published in WebCONSORT | Scenario 2. Adapted from Scenario 1 |
|----------------|-------------------------------|-----------------------------------------------------------|-------------------------------------|
| 1              | Outcomes (6a)                 | 77% (79 of 103)                                           | 77% (79 of 103)                     |
| 2              | Sample size (7a)              | 83% (85 of 103)                                           | 83% (85 of 103)                     |
| 3              | Sequence generation (8a)      | 76% (78 of 103)                                           | 76% (78 of 103)                     |
| 4              | Allocation concealment (9)    | 55% (57 of 103)                                           | 55% (57 of 103)                     |
| 5              | Blinding (11a)                | 35% (36 of 103)                                           | 35% (36 of 103)                     |
| 6              | Outcomes and estimation (17a) | 44% (45 of 103)                                           | 44% (45 of 103)                     |
| 7              | Harms (19)                    | 71% (73 of 103)                                           | 71% (73 of 103)                     |
| 8              | Registration (23)             | 69% (71 of 103)                                           | 90%                                 |
| 9              | Protocol (24)                 | 19% (20 of 103)                                           | 90%                                 |
| 10             | Funding (25)                  | 34% (35 of 103)                                           | 90%                                 |
| <b>Overall</b> |                               | <b>56%</b>                                                | <b>71%</b>                          |

Abbreviation: CONSORT= CONSolidated Standards for Reporting Trials

#### 4.7 Randomisation and blinding

Articles, which meet the eligibility criteria as a primary report of an RCT, for which the journal decides to send out for external peer review will be randomised into one of the two groups (allocation 1:1). The randomisation list will be created by the study-randomizer system (43) using random block sizes between 2 and 8 and stratification by journal. As soon as the first peer-reviewer accepts the invitation, the manuscript will be included and randomised to one of the two intervention arms. One of the investigators (BS) will log onto the study randomizer-system (43) entering the study identification number (ID; provided from the Journal), the study title, as well as the journal the study was submitted to. Subsequently, all additional peer-reviewers accepting the invitation to review the same manuscript will receive the same intervention (C-short plus usual practice or usual practice only) as the first peer-reviewer.

Authors will be blinded to the intervention allocation. Editors will not be actively informed about the randomisation (possible exception listed under "4.3 Interventions"). To avoid potential bias, peer reviewers and manuscript authors will not be informed of the study hypothesis, design and intervention.

Outcomes will be assessed in duplicate (see assessment of outcomes). At least one outcome assessors will be blinded. Due to restricted resources it might be possible that the investigator conducting the randomisation (BS) will be included in the data-extraction from published manuscripts.

#### 4.7 Data management and confidentiality

1  
2  
3 Outcomes from publications will be assessed and extracted in duplicate. Since this information  
4 is not confidential, we will use Google Forms for data extraction from published RCTs. Data  
5 entered will be validated for completeness.  
6  
7

8  
9 Data from the editorial manager software (e.g. Title of manuscript, first author, randomisation  
10 ID, Journal, date when manuscript was accepted by and academic editor, date when the final  
11 decision was made, final decision, number of peer-reviewers who peer reviewed the  
12 manuscript, the peer review) will be extracted, anonymised and entered in a password  
13 protected database which is saved on a server from the University of Oxford. Data will be  
14 managed and curated according to University of Oxford regulations, which includes regular  
15 back-up (on a daily basis) of the virtual drives where the data are stored.  
16  
17  
18  
19

20  
21 The raw data extracted from the included manuscripts can be made openly accessible in an  
22 anonymised way (i.e. giving the included RCT a number instead of identifying them).  
23 Derived/aggregated data, including anonymised information generated from the journals'  
24 editorial manager software, will be stored and made available to the research community when  
25 the project ends (see also "8. Publication policy and access to data"). Where appropriate, the  
26 researcher who has access to the editorial manager software (BS) and anyone else who will  
27 see the identifiable data will sign a confidentially agreement with the participating journals,  
28 confirming that they will not share identifiable data with any other party. Journals such as the  
29 BMJ series state in their Company Privacy Statement that research programmes for quality  
30 improvement might be in place. Furthermore, peer reviewers for all BMJ journals receive the  
31 following statement in their invitation letter "*We are constantly trying to find ways of improving  
32 the peer review system and have an ongoing programme of research. If you do not wish your  
33 review entered into a study please let us know by emailing [...] as soon as possible.*"  
34  
35  
36  
37  
38  
39  
40  
41  
42  
43

#### 44 4.8 Statistical methods

##### 45 4.8.1 Populations of analysis

46 The main population for analysis will be all manuscripts randomised and accepted for  
47 publication in the participating journals. Differently from RCTs conducted with patients, where  
48 drop outs need to be carefully considered (e.g. multiple imputation of missing data), we are  
49 only interested in the reporting adherence of RCTs that are published. All outcomes will be  
50 calculated based on the main population for analysis. The secondary outcome "Time to the  
51 first decision", will additionally be calculated considering all randomised manuscripts (including  
52 the ones which were not published).  
53  
54  
55  
56  
57  
58  
59  
60

#### 4.8.2 Data analysis

All quantitative variables will be described using means and standard deviations, or median and interquartile ranges in case severe departures from a normal distribution are identified. Data distribution will be inspected visually (i.e. by histograms) instead of performing formal statistical tests for normality. Categorical variables will be described using frequencies and percentages. For the primary and secondary outcomes, we will estimate the difference between means between the two groups and report them with respective 95% confidence intervals.

#### 4.8.3 Analysis of primary endpoint

The primary outcome will be the difference of the mean proportion of adequately reported items of the 10 most important and poorly reported CONSORT items. If the data on the primary outcome is normally distributed then the two groups (i.e. C-short plus usual practice vs. usual practice) will be compared using an unpaired Student's t-test to compare the unadjusted mean proportion of adequate reporting. If the data is not normally distributed, comparisons will be performed using a non-parametric equivalent test (i.e. Wilcoxon-Mann-Whitney test for testing whether the population medians of the two groups are the same).

For the analyses of the primary outcomes a p-value of 0.05 (5% significance level) will be used to indicate statistical significance and treatment effect (mean difference) reported with 95% confidence intervals (or median and respective interquartile ranges, in case of asymmetric distribution). Exact p-values will be presented up to three decimal places. We anticipate there will be no missing data in this study, neither at the individual C-short items, nor at the manuscript level. This is due to the study design, which will include only the randomised manuscripts that are accepted for publication.

#### 4.8.4 Analysis of secondary endpoints

To investigate the effect of the intervention on the secondary outcomes, mean differences with respective 95% confidence intervals will also be reported for these outcomes. If normality is not observed for any of the continuous secondary outcomes, the same strategy adopted for the primary outcome (use of a non-parametric equivalent to the Student's t-test) will be used.

A p-value of 0.05 will indicate statistical significance for the observed treatment effect on the secondary outcomes. Exact p-values will be presented up to three decimal places. Similarly to the primary outcome, we anticipate there will be no missing data for any of the secondary



1  
2  
3 outcomes, as we will have access to the Editorial Management system of the included  
4 journals, where all relevant information is automatically reported.  
5  
6

#### 7 4.8.5 Pre-specified subgroup analysis

#### 8

9 No formal subgroup comparative analysis is planned for the primary or secondary outcomes.  
10 However, the effect of the intervention on the primary outcome within subgroups, will be  
11 presented using forest plots to visually examine whether it differs according to some variables,  
12 such as: (1) Journals that actively implement the CONSORT Statement (defined as requiring  
13 authors to submit a completed CONSORT checklist alongside their manuscript) vs. journals  
14 that are not actively implementing the CONSORT Statement; (2) sample size ( $n < 100$  vs.  $n \geq$   
15  $100$ ); and (3) impact factor ( $<5$ ,  $5.1-10$ ;  $>10$ ) as there is evidence that higher impact factor as  
16 well as higher sample size are associated with higher adherence to reporting guidelines (44).  
17 These analyses will be exploratory, with the aim of supporting new hypothesis generation,  
18 rather than conclusive.  
19  
20  
21  
22  
23  
24  
25  
26

## 27 **5 Legal and general logistics**

### 28 5.1. Organisation of study

### 29

### 30

### 31

#### 32 5.1.1 Coordinating centre

#### 33

34 The coordinating centre's, will be the Centre for Statistics in Medicine at the University of  
35 Oxford under the responsibilities of Dr Sally Hopewell and Dr Benjamin Speich.  
36

37 The coordinating centre's will ensure the following missions:

- 38 • Training of the staff
- 39 • Implementation of quality control
- 40 • Logical controls of data
- 41 • Follow-up on requests for correction/validation
- 42 • Statistical analysis
- 43 • Archiving of data
- 44
- 45
- 46
- 47
- 48
- 49

#### 50 5.1.2 Scientific committee

#### 51

52 The scientific committee is composed of:

- 53 • Prof Isabelle Boutron: Centre D'Épidémiologie Clinique Hôtel-Dieu, Paris Descartes  
54 University, France
- 55 • Prof Matthias Briel, University of Basel, Switzerland
- 56 • Associate Prof Sally Hopewell: Centre for Statistics in Medicine, University of Oxford,  
57 UK
- 58
- 59
- 60



- Prof David Moher: Centre for Journalology, Clinical Epidemiology Program, Ottawa Hospital Research Institute, Canada
- Prof Philippe Ravaud: Centre d'Épidémiologie Clinique Hôtel-Dieu, Paris Descartes University, France
- Dr Benjamin Speich, Centre for Statistics in Medicine, University of Oxford, UK
- Dr. Michael M Schlusser, Centre for Statistics in Medicine, University of Oxford, UK
- Dr Sara Schroter, The BMJ, London, UK

The scientific committee is in charge of:

- Participating in the elaboration of the protocol
- Defining and validating the additional short explanation for each CONSORT item.
- Following the evolution of the committed study
- Publishing the results of this study

## 5.2. Regulatory aspects

Ethical approval for this study will be sought from the Central University Research Ethics Committee (CUREC) of the University of Oxford. Any amendments in the conduct of the study, collection of outcomes or analysis will be reported to the CUREC. The tested intervention has the goal to improve the quality of published journals (i.e. the adherence to CONSORT) and could also be implemented as usual practice without testing at the journal level. In agreement with another study, testing a similar intervention (45), we think that it is ethical to conduct this study without obtaining written consent. The main reason for this procedure are the following:

- Informing the authors and peer-reviewers would make it impossible to measure the effect of our intervention. In short, informing peer-reviewers and authors would create an artificial context which would not be comparable any more to the “real world context”. Authors and peer-reviewers would most likely be much more aware of CONSORT if they received information about the study. Furthermore, being aware to participate in a study could strongly influence the natural behaviour of peer-reviewers (e.g. putting more effort into reviewing a manuscript than under “real world conditions”) but also of authors.
- The intervention does not pose any risk of harms for authors and peer-reviewers.
- The intervention is not a medical intervention but rather tries to improve the research quality and journal processes.
- Several journal series (e.g. BMJ series) have Company Privacy Statements in place which clearly mention that research programmes might be in place for quality improvement.

- The intervention could be part of the routine at any Journal without previous assessment of its efficacy.
- No data which identifies participating manuscripts will be published.

## 6 Publication policy and access to data

The results from this study will be published in a peer-reviewed journal irrespective of the study results. Authorship to publications will be granted according to the rules of the International Committee of Medical Journal Editors (ICMJE). We plan to publish the full anonymised dataset as a supplementary file together with the main publication.

For peer review only

## References

1. Duley L, Antman K, Arena J, Avezum A, Blumenthal M, Bosch J, et al. Specific barriers to the conduct of randomized trials. *Clin Trials*. 2008;5(1):40-8.
2. Collins R, MacMahon S. Reliable assessment of the effects of treatment on mortality and major morbidity, I: clinical trials. *Lancet*. 2001;357(9253):373-80.
3. Chalmers I. Unbiased, relevant, and reliable assessments in health care: important progress during the past century, but plenty of scope for doing better. *BMJ*. 1998;317(7167):1167-8.
4. Collier R. Rapidly rising clinical trial costs worry researchers. *CMAJ*. 2009;180(3):277-8.
5. Eisenstein EL. Commentary on Sertkaya et al. and Larson et al. *Clin Trials*. 2016;13(2):137-9.
6. Sertkaya A, Wong HH, Jessup A, Beleche T. Key cost drivers of pharmaceutical clinical trials in the United States. *Clin Trials*. 2016;13(2):117-26.
7. Glasziou P, Altman DG, Bossuyt P, Boutron I, Clarke M, Julious S, et al. Reducing waste from incomplete or unusable reports of biomedical research. *Lancet*. 2014;383(9913):267-76.
8. Chan AW, Song F, Vickers A, Jefferson T, Dickersin K, Gotzsche PC, et al. Increasing value and reducing waste: addressing inaccessible research. *Lancet*. 2014;383(9913):257-66.
9. Chan AW, Tetzlaff JM, Altman DG, Dickersin K, Moher D. SPIRIT 2013: new guidance for content of clinical trial protocols. *Lancet*. 2013;381(9861):91-2.
10. Chan AW, Tetzlaff JM, Altman DG, Laupacis A, Gotzsche PC, Krleza-Jeric K, et al. SPIRIT 2013 statement: defining standard protocol items for clinical trials. *Ann Intern Med*. 2013;158(3):200-7.
11. Chan AW, Tetzlaff JM, Gotzsche PC, Altman DG, Mann H, Berlin JA, et al. SPIRIT 2013 explanation and elaboration: guidance for protocols of clinical trials. *BMJ*. 2013;346:e7586.
12. Lund H, Brunnhuber K, Juhl C, Robinson K, Leenaars M, Dorch BF, et al. Towards evidence based research. *BMJ*. 2016;355:i5440.
13. Kasenda B, von Elm E, You J, Blumle A, Tomonaga Y, Saccilotto R, et al. Prevalence, characteristics, and publication of discontinued randomized trials. *JAMA*. 2014;311(10):1045-51.
14. Alturki R, Schandelmaier S, Olu KK, von Niederhausern B, Agarwal A, Frei R, et al. Premature trial discontinuation often not accurately reflected in registries: comparison of registry records with publications. *J Clin Epidemiol*. 2017;81:56-63.
15. Altman DG, Simera I, Hoey J, Moher D, Schulz K. EQUATOR: reporting guidelines for health research. *Lancet*. 2008;371(9619):1149-50.
16. Simera I. EQUATOR Network collates resources for good research. *BMJ*. 2008;337:a2471.
17. Simera I, Altman DG. Writing a research article that is "fit for purpose": EQUATOR Network and reporting guidelines. *Evid Based Med*. 2009;14(5):132-4.
18. Simera I, Altman DG, Moher D, Schulz KF, Hoey J. Guidelines for reporting health research: the EQUATOR network's survey of guideline authors. *PLoS Med*. 2008;5(6):e139.
19. Simera I, Moher D, Hirst A, Hoey J, Schulz KF, Altman DG. Transparent and accurate reporting increases reliability, utility, and impact of your research: reporting guidelines and the EQUATOR Network. *BMC Med*. 2010;8:24.
20. Simera I, Moher D, Hoey J, Schulz KF, Altman DG. The EQUATOR Network and reporting guidelines: Helping to achieve high standards in reporting health research studies. *Maturitas*. 2009;63(1):4-6.
21. Moher D, Hopewell S, Schulz KF, Montori V, Gotzsche PC, Devereaux PJ, et al. CONSORT 2010 explanation and elaboration: updated guidelines for reporting parallel group randomised trials. *BMJ*. 2010;340:c869.

22. Schulz KF, Altman DG, Moher D, Group C. CONSORT 2010 statement: updated guidelines for reporting parallel group randomised trials. *BMJ*. 2010;340:c332.
23. Schulz KF, Altman DG, Moher D, Group C. CONSORT 2010 Statement: updated guidelines for reporting parallel group randomised trials. *BMC Med*. 2010;8:18.
24. CONSORT Transparent Reporting of Trials. Endorsers. Journals and Organizations. <http://www.consort-statement.org/about-consort/endorsers> [accessed: 27 February 2019]
25. Chan AW, Hrobjartsson A, Haahr MT, Gotzsche PC, Altman DG. Empirical evidence for selective reporting of outcomes in randomized trials: comparison of protocols to published articles. *JAMA*. 2004;291(20):2457-65.
26. Chalmers I, Glasziou P. Avoidable waste in the production and reporting of research evidence. *Lancet*. 2009;374(9683):86-9.
27. Ioannidis JP, Lau J. Completeness of safety reporting in randomized trials: an evaluation of 7 medical areas. *JAMA*. 2001;285(4):437-43.
28. Glasziou P, Meats E, Heneghan C, Shepperd S. What is missing from descriptions of treatment in trials and reviews? *BMJ*. 2008;336(7659):1472-4.
29. Boutron I, Dutton S, Ravaud P, Altman DG. Reporting and interpretation of randomized controlled trials with statistically nonsignificant results for primary outcomes. *JAMA*. 2010;303(20):2058-64.
30. Hopewell S, Dutton S, Yu LM, Chan AW, Altman DG. The quality of reports of randomised trials in 2000 and 2006: comparative study of articles indexed in PubMed. *BMJ*. 2010;340:c723.
31. Turner L, Shamseer L, Altman DG, Schulz KF, Moher D. Does use of the CONSORT Statement impact the completeness of reporting of randomised controlled trials published in medical journals? A Cochrane review. *Syst Rev*. 2012;1:60.
32. Oduyayo A, Emdin CA, Hsiao AJ, Shakir M, Copsey B, Dutton S, et al. Association between trial registration and positive study findings: cross sectional study (Epidemiological Study of Randomized Trials-ESORT). *BMJ*. 2017;356:j917.
33. Chan AW, Krleza-Jeric K, Schmid I, Altman DG. Outcome reporting bias in randomized trials funded by the Canadian Institutes of Health Research. *CMAJ*. 2004;171(7):735-40.
34. Glass KC. Toward a duty to report clinical trials accurately: the clinical alert and beyond. *J Law Med Ethics*. 1994;22(4):327-38.
35. Shamseer L, Hopewell S, Altman DG, Moher D, Schulz KF. Update on the endorsement of CONSORT by high impact factor journals: a survey of journal "Instructions to Authors" in 2014. *Trials*. 2016;17(1):301.
36. Hopewell S, Altman DG, Moher D, Schulz KF. Endorsement of the CONSORT Statement by high impact factor medical journals: a survey of journal editors and journal 'Instructions to Authors'. *Trials*. 2008;9:20.
37. Hopewell S, Ravaud P, Baron G, Boutron I. Effect of editors' implementation of CONSORT guidelines on the reporting of abstracts in high impact medical journals: interrupted time series analysis. *BMJ*. 2012;344:e4178.
38. Hopewell S, Boutron I, Altman DG, Barbour G, Moher D, Montori V, et al. Impact of a web-based tool (WebCONSORT) to improve the reporting of randomised trials: results of a randomised controlled trial. *BMC Med*. 2016;14(1):199.
39. Blanco D, Kirkham JJ, Altman DG, Moher D, Boutron I, Cobo E. Interventions to improve adherence to reporting guidelines in health research: a scoping review protocol. *BMJ Open*. 2017;7(11):e017551.
40. Hopewell S, Collins GS, Boutron I, Yu LM, Cook J, Shanyinde M, et al. Impact of peer review on reports of randomised trials published in open peer review journals: retrospective before and after study. *BMJ*. 2014;349:g4145.
41. Cobo E, Selva-O'Callaghan A, Ribera JM, Cardellach F, Dominguez R, Vilardell M. Statistical reviewers improve reporting in biomedical articles: a randomized trial. *PLoS One*. 2007;2(3):e332.

- 1  
2  
3 42. Barnes C, Boutron I, Giraudeau B, Porcher R, Altman DG, Ravaud P. Impact of an  
4 online writing aid tool for writing a randomized trial report: the COBWEB (Consort-based  
5 WEB tool) randomized controlled trial. BMC Med. 2015;13:221.  
6 43. Study Randomizer. <https://studyrandomizer.com/> [accessed: 23. January 2019].  
7 44. Jin Y, Sanger N, Shams I, Luo C, Shahid H, Li G, et al. Does the medical literature  
8 remain inadequately described despite having reporting guidelines for 21 years? - A  
9 systematic review of reviews: an update. Journal of multidisciplinary healthcare.  
10 2018;11:495-510.  
11 45. Hair K, Macleod MR, Sena ES. A randomised controlled trial of an Intervention to  
12 Improve Compliance with the ARRIVE guidelines (IICARus). bioRxiv. 2018.  
13  
14  
15  
16  
17  
18  
19  
20  
21  
22  
23  
24  
25  
26  
27  
28  
29  
30  
31  
32  
33  
34  
35  
36  
37  
38  
39  
40  
41  
42  
43  
44  
45  
46  
47  
48  
49  
50  
51  
52  
53  
54  
55  
56  
57  
58  
59  
60

For peer review only

## Appendix

Appendix 1: Example of the email which will be sent out in the intervention arm (C-Short). The exact wording might be slightly adapted according to the journal preferences.

Dear *\*Title, Name\**,

We thank you for accepting to peer-review a manuscript for *\*journal name\**. As we are trying to improve the reporting for randomised controlled trials according to the CONSORT guidelines, we would like to ask if you could check whether the following most important and poorly reported items are adequately implemented as indicated in the *table below/attached table*.

| Item | Section                         | CONSORT item                                                                                                                                                                            | Short explanation                                                                                                                                                                                                                                                                                                                       |
|------|---------------------------------|-----------------------------------------------------------------------------------------------------------------------------------------------------------------------------------------|-----------------------------------------------------------------------------------------------------------------------------------------------------------------------------------------------------------------------------------------------------------------------------------------------------------------------------------------|
| 1    | Outcomes (6a)                   | Completely defined pre-specified primary outcome measure, including how and when they were assessed                                                                                     | Is it clear (1) what the primary outcome is (usually the one used in the sample size calculation), (2) how it was measured (if relevant; e.g. which score used), (3) at what time point, and (4) what the analysis metric was (e.g. change from baseline, final value)?                                                                 |
| 2    | Sample size (7a)                | How sample size was determined                                                                                                                                                          | Is there a clear description of how the sample size was determined, including (1) the estimated outcomes in each group; (2) the $\alpha$ (type I) error level; (3) the statistical power (or the $\beta$ (type II) error level); and (4) for continuous outcomes, the standard deviation of the measurements?                           |
| 3    | Sequence generation (8a)        | Method used to generate random allocation sequence                                                                                                                                      | Does the description make it clear if the "assigned intervention is determined by a chance process and cannot be predicted"?                                                                                                                                                                                                            |
| 4    | Allocation concealment (9)      | Mechanism used to implement random allocation sequence (such as sequentially numbered containers), describing any steps taken to conceal the sequence until interventions were assigned | Is it clear how the care provider enrolling participants was made ignorant of the next assignment in the sequence (different from blinding)? Possible methods can rely on centralised or "third-party" assignment (i.e., use of a central telephone randomisation system, automated assignment system, sealed containers).              |
| 5    | Blinding (11a)                  | If done, who was blinded after assignment to interventions (for example, participants, care providers, those assessing outcomes)                                                        | Is it clear if (1) healthcare providers, (2) patients, and (3) outcome assessors are blinded to the intervention? General terms such as "double-blind" without further specifications should be avoided.                                                                                                                                |
| 6    | Outcomes and estimation (17a/b) | For the primary outcome, results for each group, and the estimated effect size and its precision (such as 95% confidence intervals)                                                     | Is the estimated effect size and its precision (such as standard deviation or 95% confidence intervals) for each treatment arm reported? When the primary outcome is binary, both the relative effect (risk ratio, relative risk) or odds ratio and the absolute effect (risk difference) should be reported with confidence intervals. |
| 7    | Harms (19)                      | All-important harms or unintended effects in each group                                                                                                                                 | Is the number of affected persons in each group, the severity grade (if relevant) and the absolute risk (e.g. frequency of incidence) reported? Are the number of serious, life threatening events and deaths reported? If no adverse event occurred this should be clearly stated.                                                     |
| 8    | Registration (23)               | Registration number and name of trial registry                                                                                                                                          | Is the registry and the registration number reported? If the trial was not registered, it should be explained why.                                                                                                                                                                                                                      |
| 9    | Protocol (24)                   | Where trial protocol can be accessed                                                                                                                                                    | Is it stated where the trial protocol can be assessed (e.g. published, supplementary file, repository, directly from author, confidential and therefore not available)?                                                                                                                                                                 |
| 10   | Funding (25)                    | Sources of funding and other support (such as supply of drugs) and role of funders                                                                                                      | Are (1) the funding sources, and (2) the role of funder(s) described?                                                                                                                                                                                                                                                                   |

Your efforts are highly appreciated.

Kind regards,

*\*journal name\**-Team



**Appendix 3: WHO Trial Registration Data Set (Version 1.3.1)**

Statement was filled out on the 01. October 2019.

**1. Primary Registry and Trial Identifying Number**

This trial was denied registration on ClinicalTrials.gov as the study is not a clinical study that assesses a health outcome in human subjects. Instead we registered the trial on the Open Science Framework (<https://osf.io/c4hn8>).

**2. Date of Registration in Primary Registry**

21. June 2019

**3. Secondary Identifying Numbers**

Not applicable

**4. Source(s) of Monetary or Material Support**

No specific funding was acquired for this study. Benjamin Speich is supported by an Advanced Postdoc.Mobility grant from the Swiss National Science Foundation (P300PB\_177933). David Moher is supported by a University Research Chair, Ottawa. Michael M Schlüssel is funded by Cancer Research UK. The funders had no role in designing the study and will also have no role in conducting the study, or analysing and reporting study results.

**5. Primary Sponsor**

|                                              |                                                                                                                                                                                                                                                                                                                           |
|----------------------------------------------|---------------------------------------------------------------------------------------------------------------------------------------------------------------------------------------------------------------------------------------------------------------------------------------------------------------------------|
| Sponsor:                                     | University of Oxford                                                                                                                                                                                                                                                                                                      |
| Principal Investigator/Sponsor Investigator: | Benjamin Speich, PhD<br>Postdoctoral Researcher<br>Centre for Statistics in Medicine (CSM)<br>Nuffield Department of Orthopaedics, Rheumatology and<br>Musculoskeletal Sciences (NDORMS)<br>University of Oxford<br>Windmill Road<br>Oxford OX3 7LD<br>Tel: +44 1865 737904<br><br>Email: benjamin.speich@ndorms.ox.ac.uk |

**6. Secondary Sponsor(s)**

Not applicable

1  
2  
3 **7. Contact for Public Queries**

4 Dr. Benjamin Speich

5  
6 Tel: +44 1865 737904

7  
8 Email: benjamin.speich@ndorms.ox.ac.uk

9  
10  
11 **8. Contact for Scientific Queries**

12  
13 Sponsor: University of Oxford  
14  
15 Principal Investigator/Sponsor Benjamin Speich, PhD  
16 Investigator: Postdoctoral Researcher  
17 Centre for Statistics in Medicine (CSM)  
18 Nuffield Department of Orthopaedics, Rheumatology and  
19 Musculoskeletal Sciences (NDORMS)  
20 University of Oxford  
21 Windmill Road  
22 Oxford OX3 7LD  
23 Tel: +44 1865 737904  
24  
25 Email: benjamin.speich@ndorms.ox.ac.uk

26  
27  
28  
29  
30 **9. Public Title**

31  
32 Impact of checklists to improve the reporting of randomised controlled trials published in  
33 biomedical journals

34  
35 **10. Scientific Title**

36  
37 Impact of a short version of the CONSORT checklist for peer reviewers to improve the  
38 reporting of randomised controlled trials published in biomedical journals: a randomised  
39 controlled trial

40 Running title: CONSORT for Peer Review (CONSORT-PR)

41  
42  
43 Study identifier: CONSORT-PR

44  
45  
46  
47 **11. Countries of Recruitment**

48 Multinational (Centres are Biomedical journals)

49  
50 **12. Health Condition(s) or Problem(s) Studied**

51 Reporting in published randomised controlled trials

52  
53  
54  
55  
56 **13. Intervention(s)**

57  
58 Control group: Usual practice



1  
2  
3 After accepting to review a manuscript, peer reviewers will receive the automated, journal  
4 specific standard email with general information as per each journal's usual practice (e.g.  
5 where to access the manuscript, date the peer review report is due).  
6  
7  
8  
9

#### 10 Intervention group: C-short plus usual practice

11 After accepting to review a manuscript, peer reviewers will receive the automated, journal  
12 specific standard email with general information (identical to control group). In addition, peer  
13 reviewers will receive an additional email from the editorial office that includes a short  
14 version of the CONSORT checklist (C-short) together with a brief explanation of the items  
15 either as a table within the email or as an attachment. Peer reviewers will be asked to check  
16 whether the items in the C-short checklist are addressed in the manuscript and to request  
17 authors to include these items if they are not adequately reported.  
18  
19  
20  
21  
22

#### 23 **14. Key Inclusion and Exclusion Criteria**

24  
25 The population will be defined on two levels: included journals and included manuscripts.  
26

##### 27 Inclusion criteria for journals:

28  
29 Included journals must: i) endorse the CONSORT Statement by mentioning it in the journals'  
30 Instruction to Authors; ii) have published primary results of at least five RCTs in 2017  
31 (identified using a PubMed search).  
32

##### 33 Inclusion criteria for manuscripts

34  
35 • All new manuscript submissions reporting the primary results of RCTs, which the  
36 journal editor has decided to send out for external peer review. Since the 10 chosen  
37 CONSORT checklist items (C-short) are applicable to different study designs, we will include  
38 all manuscripts reporting the primary results of RCTs regardless of study design (e.g. parallel  
39 group trial, cluster trial, superiority trial, non-inferiority/equivalence trials).  
40  
41

##### 42 Exclusion criteria for manuscripts

- 43  
44 • Manuscripts clearly presenting secondary trial results, additional time points, economic  
45 analyses, or any other analyses.  
46  
47 • Manuscripts which are clearly labelled as a pilot or feasibility study or animal studies.  
48  
49 • Manuscripts not sent for peer review.  
50  
51  
52  
53  
54

#### 55 **15. Study Type**

56  
57 This study is a multicentre RCT with submitted manuscripts as the unit of randomisation  
58 (allocation ratio 1:1).  
59  
60

1  
2  
3 **16. Date of First Enrollment**  
4

5 22. July 2019  
6  
7  
8

9 **17. Sample Size**

10 166 Since the final sample size will be based on the number of articles published, rather than  
11 on the number of manuscripts randomised, eligible manuscripts will be randomised until 83  
12 articles are published in each arm (resulting in no less than 166 articles), to avoid loss of power  
13 due to potential imbalance between arms.  
14

15  
16 **18. Recruitment Status**  
17

18 Recruiting  
19

20 **19. Primary Outcome(s)**

- 21
- 22 • The primary outcome of this study will be the difference in the mean proportion of  
23 adequately reported C-short items in published articles between the two groups.  
24

25 **20. Key Secondary Outcomes**  
26

- 27 • Mean proportion of adequately reported C-short items in published articles  
28 considering each item separately.
- 29 • Difference in mean proportion of adequately reported C-short items in published  
30 articles considering each sub-item (see “Assessment of outcomes”) as a separate item.
- 31 • Time from assigning an editor to the first decision (as communicated to the author  
32 after the first round of peer-review).
- 33 • Proportion of manuscripts rejected after the first round of peer review.
- 34 • Proportion of manuscripts that will be published in the journal under study.  
35  
36  
37  
38  
39  
40  
41  
42  
43

44 **21. Ethics Review**

45 Ethical approval has been obtained from the Medical Sciences Interdivisional Research  
46 Ethics Committee of the University of Oxford (R62779/RE001).  
47  
48

49 **22. Completion date**

50 We expect that recruitment will be finished in summer 2021.  
51

52 **23. Summary Results**

53 Not applicable  
54

55 **24. IPD sharing statement**  
56

57 We plan to make the anonymised dataset, including the data from the published articles,  
58 available as a supplementary file of the main publication.  
59  
60

1 **Impact of a short form of the CONSORT checklist for peer reviewers to improve the reporting of randomised controlled trials published**  
 2 **in biomedical journals: study protocol for a randomised controlled trial**  
 3  
 4  
 5  
 6

7 Benjamin Speich<sup>1,2,\*</sup>, Sara Schroter<sup>3</sup>, Matthias Briel<sup>2,4</sup>, David Moher<sup>5</sup>, Michael M Schlusser<sup>1</sup>, Philippe Ravaud<sup>6,7</sup>, Isabelle Boutron<sup>6,7</sup>, Sally Hopewell<sup>1</sup>  
 8  
 9  
 10  
 11  
 12  
 13  
 14  
 15  
 16  
 17

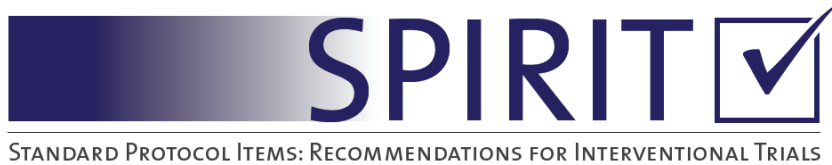

18  
 19  
 20 SPIRIT 2013 Checklist: Recommended  
 21 and related documents\*

items to address in a clinical trial protocol

| Section/item                      | Item No | Description                                                                                                  | Addressed on page number |
|-----------------------------------|---------|--------------------------------------------------------------------------------------------------------------|--------------------------|
| <b>Administrative information</b> |         |                                                                                                              |                          |
| Title                             | 1       | Descriptive title identifying the study design, population, interventions, and, if applicable, trial acronym | 1_____                   |
| Trial registration                | 2a      | Trial identifier and registry name. If not yet registered, name of intended registry                         | 3_____                   |
|                                   | 2b      | All items from the World Health Organization Trial Registration Data Set                                     | Appendix 3               |
| Protocol version                  | 3       | Date and version identifier                                                                                  | Appendix 1               |
| Funding                           | 4       | Sources and types of financial, material, and other support                                                  | 24_____                  |
| Roles and responsibilities        | 5a      | Names, affiliations, and roles of protocol contributors                                                      | 1 and 24-25__            |
|                                   | 5b      | Name and contact information for the trial sponsor                                                           | 1 and Appendix 1_        |

|    |                                                           |     |                                                                                                                 |                  |
|----|-----------------------------------------------------------|-----|-----------------------------------------------------------------------------------------------------------------|------------------|
| 1  |                                                           | 5c  | Role of study sponsor and funders, if any, in study design; collection, management, analysis, and               | 24-25_____       |
| 2  |                                                           |     | interpretation of data; writing of the report; and the decision to submit the report for publication, including |                  |
| 3  |                                                           |     | whether they will have ultimate authority over any of these activities                                          |                  |
| 4  |                                                           |     |                                                                                                                 |                  |
| 5  |                                                           | 5d  | Composition, roles, and responsibilities of the coordinating centre, steering committee, endpoint               | 24-25_____       |
| 6  |                                                           |     | adjudication committee, data management team, and other individuals or groups overseeing the trial, if          |                  |
| 7  |                                                           |     | applicable (see Item 21a for data monitoring committee)                                                         |                  |
| 8  |                                                           |     |                                                                                                                 |                  |
| 9  |                                                           |     |                                                                                                                 |                  |
| 10 |                                                           |     |                                                                                                                 |                  |
| 11 | <b>Introduction</b>                                       |     |                                                                                                                 |                  |
| 12 |                                                           |     |                                                                                                                 |                  |
| 13 | Background and                                            | 6a  | Description of research question and justification for undertaking the trial, including summary of relevant     | 5-7_____         |
| 14 | rationale                                                 |     | studies (published and unpublished) examining benefits and harms for each intervention                          |                  |
| 15 |                                                           | 6b  | Explanation for choice of comparators                                                                           | 5-7 (comparator, |
| 16 |                                                           |     |                                                                                                                 | usual            |
| 17 |                                                           |     |                                                                                                                 | practice)_____   |
| 18 |                                                           |     |                                                                                                                 |                  |
| 19 |                                                           |     |                                                                                                                 |                  |
| 20 |                                                           |     |                                                                                                                 |                  |
| 21 | Objectives                                                | 7   | Specific objectives or hypotheses                                                                               | 7                |
| 22 |                                                           |     |                                                                                                                 |                  |
| 23 | Trial design                                              | 8   | Description of trial design including type of trial (eg, parallel group, crossover, factorial, single group),   | 7_____           |
| 24 |                                                           |     | allocation ratio, and framework (eg, superiority, equivalence, noninferiority, exploratory)                     |                  |
| 25 |                                                           |     |                                                                                                                 |                  |
| 26 |                                                           |     |                                                                                                                 |                  |
| 27 | <b>Methods: Participants, interventions, and outcomes</b> |     |                                                                                                                 |                  |
| 28 |                                                           |     |                                                                                                                 |                  |
| 29 | Study setting                                             | 9   | Description of study settings (eg, community clinic, academic hospital) and list of countries where data will   | 7-9_____         |
| 30 |                                                           |     | be collected. Reference to where list of study sites can be obtained                                            |                  |
| 31 |                                                           |     |                                                                                                                 |                  |
| 32 | Eligibility criteria                                      | 10  | Inclusion and exclusion criteria for participants. If applicable, eligibility criteria for study centres and    | 7-9_             |
| 33 |                                                           |     | individuals who will perform the interventions (eg, surgeons, psychotherapists)                                 |                  |
| 34 |                                                           |     |                                                                                                                 |                  |
| 35 | Interventions                                             | 11a | Interventions for each group with sufficient detail to allow replication, including how and when they will be   | 9-10, Table 1,   |
| 36 |                                                           |     | administered                                                                                                    | Appendix_____    |
| 37 |                                                           | 11b | Criteria for discontinuing or modifying allocated interventions for a given trial participant (eg, drug dose    | NA (one time     |
| 38 |                                                           |     | change in response to harms, participant request, or improving/worsening disease)                               | intervention)    |
| 39 |                                                           |     |                                                                                                                 |                  |
| 40 |                                                           |     |                                                                                                                 |                  |
| 41 |                                                           |     |                                                                                                                 |                  |
| 42 |                                                           |     |                                                                                                                 |                  |
| 43 |                                                           |     |                                                                                                                 |                  |
| 44 |                                                           |     |                                                                                                                 |                  |
| 45 |                                                           |     |                                                                                                                 |                  |
| 46 |                                                           |     |                                                                                                                 |                  |

|    |                      |     |                                                                                                                                                                                                                                                                                                                                                                                |                                 |
|----|----------------------|-----|--------------------------------------------------------------------------------------------------------------------------------------------------------------------------------------------------------------------------------------------------------------------------------------------------------------------------------------------------------------------------------|---------------------------------|
| 1  |                      | 11c | Strategies to improve adherence to intervention protocols, and any procedures for monitoring adherence (eg, drug tablet return, laboratory tests)                                                                                                                                                                                                                              | NA (one time intervention)      |
| 2  |                      |     |                                                                                                                                                                                                                                                                                                                                                                                |                                 |
| 3  |                      |     |                                                                                                                                                                                                                                                                                                                                                                                |                                 |
| 4  |                      | 11d | Relevant concomitant care and interventions that are permitted or prohibited during the trial                                                                                                                                                                                                                                                                                  | NA_____                         |
| 5  |                      |     |                                                                                                                                                                                                                                                                                                                                                                                |                                 |
| 6  | Outcomes             | 12  | Primary, secondary, and other outcomes, including the specific measurement variable (eg, systolic blood pressure), analysis metric (eg, change from baseline, final value, time to event), method of aggregation (eg, median, proportion), and time point for each outcome. Explanation of the clinical relevance of chosen efficacy and harm outcomes is strongly recommended | 10-12_____                      |
| 7  |                      |     |                                                                                                                                                                                                                                                                                                                                                                                |                                 |
| 8  |                      |     |                                                                                                                                                                                                                                                                                                                                                                                |                                 |
| 9  |                      |     |                                                                                                                                                                                                                                                                                                                                                                                |                                 |
| 10 |                      |     |                                                                                                                                                                                                                                                                                                                                                                                |                                 |
| 11 | Participant timeline | 13  | Time schedule of enrolment, interventions (including any run-ins and washouts), assessments, and visits for participants. A schematic diagram is highly recommended (see Figure)                                                                                                                                                                                               | Figure 1 and Table Table 2_____ |
| 12 |                      |     |                                                                                                                                                                                                                                                                                                                                                                                |                                 |
| 13 |                      |     |                                                                                                                                                                                                                                                                                                                                                                                |                                 |
| 14 | Sample size          | 14  | Estimated number of participants needed to achieve study objectives and how it was determined, including clinical and statistical assumptions supporting any sample size calculations                                                                                                                                                                                          | 13-14_____                      |
| 15 |                      |     |                                                                                                                                                                                                                                                                                                                                                                                |                                 |
| 16 |                      |     |                                                                                                                                                                                                                                                                                                                                                                                |                                 |
| 17 |                      |     |                                                                                                                                                                                                                                                                                                                                                                                |                                 |
| 18 | Recruitment          | 15  | Strategies for achieving adequate participant enrolment to reach target sample size                                                                                                                                                                                                                                                                                            | 7-8, 13-14____                  |
| 19 |                      |     |                                                                                                                                                                                                                                                                                                                                                                                |                                 |

**Methods: Assignment of interventions (for controlled trials)**

Allocation:

|    |                                  |     |                                                                                                                                                                                                                                                                                                                                                          |         |
|----|----------------------------------|-----|----------------------------------------------------------------------------------------------------------------------------------------------------------------------------------------------------------------------------------------------------------------------------------------------------------------------------------------------------------|---------|
| 24 | Sequence generation              | 16a | Method of generating the allocation sequence (eg, computer-generated random numbers), and list of any factors for stratification. To reduce predictability of a random sequence, details of any planned restriction (eg, blocking) should be provided in a separate document that is unavailable to those who enrol participants or assign interventions | 14_____ |
| 25 |                                  |     |                                                                                                                                                                                                                                                                                                                                                          |         |
| 26 |                                  |     |                                                                                                                                                                                                                                                                                                                                                          |         |
| 27 |                                  |     |                                                                                                                                                                                                                                                                                                                                                          |         |
| 28 |                                  |     |                                                                                                                                                                                                                                                                                                                                                          |         |
| 29 |                                  |     |                                                                                                                                                                                                                                                                                                                                                          |         |
| 30 | Allocation concealment mechanism | 16b | Mechanism of implementing the allocation sequence (eg, central telephone; sequentially numbered, opaque, sealed envelopes), describing any steps to conceal the sequence until interventions are assigned                                                                                                                                                | 14_____ |
| 31 |                                  |     |                                                                                                                                                                                                                                                                                                                                                          |         |
| 32 |                                  |     |                                                                                                                                                                                                                                                                                                                                                          |         |
| 33 |                                  |     |                                                                                                                                                                                                                                                                                                                                                          |         |
| 34 | Implementation                   | 16c | Who will generate the allocation sequence, who will enrol participants, and who will assign participants to interventions                                                                                                                                                                                                                                | 14_____ |
| 35 |                                  |     |                                                                                                                                                                                                                                                                                                                                                          |         |
| 36 |                                  |     |                                                                                                                                                                                                                                                                                                                                                          |         |
| 37 |                                  |     |                                                                                                                                                                                                                                                                                                                                                          |         |
| 38 | Blinding (masking)               | 17a | Who will be blinded after assignment to interventions (eg, trial participants, care providers, outcome assessors, data analysts), and how                                                                                                                                                                                                                | 14_____ |
| 39 |                                  |     |                                                                                                                                                                                                                                                                                                                                                          |         |
| 40 |                                  |     |                                                                                                                                                                                                                                                                                                                                                          |         |
| 41 |                                  |     |                                                                                                                                                                                                                                                                                                                                                          |         |
| 42 |                                  |     |                                                                                                                                                                                                                                                                                                                                                          |         |

1 17b If blinded, circumstances under which unblinding is permissible, and procedure for revealing a participant's NA\_\_\_\_\_

2 allocated intervention during the trial

3

4

5 **Methods: Data collection, management, and analysis**

6 Data collection 18a Plans for assessment and collection of outcome, baseline, and other trial data, including any related 11-12\_\_

7 methods processes to promote data quality (eg, duplicate measurements, training of assessors) and a description of

8 study instruments (eg, questionnaires, laboratory tests) along with their reliability and validity, if known.

9 Reference to where data collection forms can be found, if not in the protocol

10

11

12 18b Plans to promote participant retention and complete follow-up, including list of any outcome data to be 15 (no missing

13 collected for participants who discontinue or deviate from intervention protocols data expected)\_\_\_

14

15 Data management 19 Plans for data entry, coding, security, and storage, including any related processes to promote data quality 16-17\_\_

16 (eg, double data entry; range checks for data values). Reference to where details of data management

17 procedures can be found, if not in the protocol

18

19

20 Statistical methods 20a Statistical methods for analysing primary and secondary outcomes. Reference to where other details of the 14-16\_\_\_\_\_

21 statistical analysis plan can be found, if not in the protocol

22

23 20b Methods for any additional analyses (eg, subgroup and adjusted analyses) 16\_\_\_\_\_

24

25 20c Definition of analysis population relating to protocol non-adherence (eg, as randomised analysis), and any 15 (no missing

26 statistical methods to handle missing data (eg, multiple imputation) data expected)\_\_\_

27

28

29 **Methods: Monitoring**

30

31 Data monitoring 21a Composition of data monitoring committee (DMC); summary of its role and reporting structure; statement of 24-25\_\_\_\_\_

32 whether it is independent from the sponsor and competing interests; and reference to where further details

33 about its charter can be found, if not in the protocol. Alternatively, an explanation of why a DMC is not

34 needed

35

36

37 21b Description of any interim analyses and stopping guidelines, including who will have access to these interim 15\_\_\_\_\_

38 results and make the final decision to terminate the trial

39

40 Harms 22 Plans for collecting, assessing, reporting, and managing solicited and spontaneously reported adverse NA\_\_

41 events and other unintended effects of trial interventions or trial conduct

42

43

44

45

46

|    |                                 |     |                                                                                                                                                                                                                                                                                     |                 |
|----|---------------------------------|-----|-------------------------------------------------------------------------------------------------------------------------------------------------------------------------------------------------------------------------------------------------------------------------------------|-----------------|
| 1  | Auditing                        | 23  | Frequency and procedures for auditing trial conduct, if any, and whether the process will be independent from investigators and the sponsor                                                                                                                                         | 24-25_____      |
| 2  |                                 |     |                                                                                                                                                                                                                                                                                     |                 |
| 3  |                                 |     |                                                                                                                                                                                                                                                                                     |                 |
| 4  | <b>Ethics and dissemination</b> |     |                                                                                                                                                                                                                                                                                     |                 |
| 5  |                                 |     |                                                                                                                                                                                                                                                                                     |                 |
| 6  | Research ethics approval        | 24  | Plans for seeking research ethics committee/institutional review board (REC/IRB) approval                                                                                                                                                                                           | 20_____         |
| 7  |                                 |     |                                                                                                                                                                                                                                                                                     |                 |
| 8  |                                 |     |                                                                                                                                                                                                                                                                                     |                 |
| 9  | Protocol amendments             | 25  | Plans for communicating important protocol modifications (eg, changes to eligibility criteria, outcomes, analyses) to relevant parties (eg, investigators, REC/IRBs, trial participants, trial registries, journals, regulators)                                                    | 20_             |
| 10 |                                 |     |                                                                                                                                                                                                                                                                                     |                 |
| 11 |                                 |     |                                                                                                                                                                                                                                                                                     |                 |
| 12 |                                 |     |                                                                                                                                                                                                                                                                                     |                 |
| 13 |                                 |     |                                                                                                                                                                                                                                                                                     |                 |
| 14 | Consent or assent               | 26a | Who will obtain informed consent or assent from potential trial participants or authorised surrogates, and how (see Item 32)                                                                                                                                                        | Appendix 2_____ |
| 15 |                                 |     |                                                                                                                                                                                                                                                                                     |                 |
| 16 |                                 |     |                                                                                                                                                                                                                                                                                     |                 |
| 17 |                                 | 26b | Additional consent provisions for collection and use of participant data and biological specimens in ancillary studies, if applicable                                                                                                                                               | NA_____         |
| 18 |                                 |     |                                                                                                                                                                                                                                                                                     |                 |
| 19 |                                 |     |                                                                                                                                                                                                                                                                                     |                 |
| 20 | Confidentiality                 | 27  | How personal information about potential and enrolled participants will be collected, shared, and maintained in order to protect confidentiality before, during, and after the trial                                                                                                | 17_             |
| 21 |                                 |     |                                                                                                                                                                                                                                                                                     |                 |
| 22 |                                 |     |                                                                                                                                                                                                                                                                                     |                 |
| 23 | Declaration of interests        | 28  | Financial and other competing interests for principal investigators for the overall trial and each study site                                                                                                                                                                       | 24_____         |
| 24 |                                 |     |                                                                                                                                                                                                                                                                                     |                 |
| 25 |                                 |     |                                                                                                                                                                                                                                                                                     |                 |
| 26 |                                 |     |                                                                                                                                                                                                                                                                                     |                 |
| 27 | Access to data                  | 29  | Statement of who will have access to the final trial dataset, and disclosure of contractual agreements that limit such access for investigators                                                                                                                                     | 20_             |
| 28 |                                 |     |                                                                                                                                                                                                                                                                                     |                 |
| 29 |                                 |     |                                                                                                                                                                                                                                                                                     |                 |
| 30 | Ancillary and post-trial care   | 30  | Provisions, if any, for ancillary and post-trial care, and for compensation to those who suffer harm from trial participation                                                                                                                                                       | NA__            |
| 31 |                                 |     |                                                                                                                                                                                                                                                                                     |                 |
| 32 |                                 |     |                                                                                                                                                                                                                                                                                     |                 |
| 33 | Dissemination policy            | 31a | Plans for investigators and sponsor to communicate trial results to participants, healthcare professionals, the public, and other relevant groups (eg, via publication, reporting in results databases, or other data sharing arrangements), including any publication restrictions | 20_____         |
| 34 |                                 |     |                                                                                                                                                                                                                                                                                     |                 |
| 35 |                                 |     |                                                                                                                                                                                                                                                                                     |                 |
| 36 |                                 |     |                                                                                                                                                                                                                                                                                     |                 |
| 37 |                                 |     |                                                                                                                                                                                                                                                                                     |                 |
| 38 |                                 | 31b | Authorship eligibility guidelines and any intended use of professional writers                                                                                                                                                                                                      | 20_____         |
| 39 |                                 |     |                                                                                                                                                                                                                                                                                     |                 |
| 40 |                                 |     |                                                                                                                                                                                                                                                                                     |                 |
| 41 |                                 |     |                                                                                                                                                                                                                                                                                     |                 |
| 42 |                                 |     |                                                                                                                                                                                                                                                                                     |                 |
| 43 |                                 |     |                                                                                                                                                                                                                                                                                     |                 |
| 44 |                                 |     |                                                                                                                                                                                                                                                                                     |                 |
| 45 |                                 |     |                                                                                                                                                                                                                                                                                     |                 |
| 46 |                                 |     |                                                                                                                                                                                                                                                                                     |                 |

|   |     |                                                                                                                 |                      |
|---|-----|-----------------------------------------------------------------------------------------------------------------|----------------------|
| 1 | 31c | Plans, if any, for granting public access to the full protocol, participant-level dataset, and statistical code | Intend to publish in |
| 2 |     |                                                                                                                 | BMJ open             |
| 3 |     |                                                                                                                 | (protocol), dataset: |
| 4 |     |                                                                                                                 | page 20              |
| 5 |     |                                                                                                                 |                      |
| 6 |     |                                                                                                                 |                      |

## Appendices

|    |    |                                                                                                           |                |
|----|----|-----------------------------------------------------------------------------------------------------------|----------------|
| 7  |    |                                                                                                           |                |
| 8  |    |                                                                                                           |                |
| 9  | 32 | Model consent form and other related documentation given to participants and authorised surrogates        | Appendix 2 (no |
| 10 |    | materials                                                                                                 | consent)_      |
| 11 |    |                                                                                                           |                |
| 12 | 33 | Plans for collection, laboratory evaluation, and storage of biological specimens for genetic or molecular | NA_____        |
| 13 |    | specimens                                                                                                 |                |
| 14 |    | analysis in the current trial and for future use in ancillary studies, if applicable                      |                |

---

\*It is strongly recommended that this checklist be read in conjunction with the SPIRIT 2013 Explanation & Elaboration for important clarification on the items. Amendments to the protocol should be tracked and dated. The SPIRIT checklist is copyrighted by the SPIRIT Group under the Creative Commons [“Attribution-NonCommercial-NoDerivs 3.0 Unported”](#) license.
